# Supplementary material for: Evolutionary Genomics Suggests That CheV Is an Additional Adaptor for Accommodating Specific Chemoreceptors within the Chemotaxis Signaling Complex
Source: PubMed Central journal article supplement (PMC4742279; doi:10.1371/journal.pcbi.1004723), 2016-02-04
Supplement: pcbi.1004723.s001.pdf [file pcbi.1004723.s001.pdf]

**S1 Table. Number of chemotaxis genes in *Enterobacteriales* genomes.** Genomes comprising a non-redundant set for comparative analysis (43 in total) are shown in bold.

| Genus                     | Species             | Strain                                                            | Chemotaxis proteins (number of genes) |          |          |          |          |          |          |          |          |
|---------------------------|---------------------|-------------------------------------------------------------------|---------------------------------------|----------|----------|----------|----------|----------|----------|----------|----------|
|                           |                     |                                                                   | MCP                                   | CheA     | CheB     | CheCX    | CheD     | CheR     | CheV     | CheZ     | CheW     |
| aphid                     | secondary           | symbionts secondary endosymbiont of <i>Ctenarytaina eucalypti</i> | 0                                     | 0        | 0        | 0        | 0        | 0        | 0        | 0        | 0        |
| aphid                     | secondary           | symbionts secondary endosymbiont of <i>Heteropsylla cubana</i>    | 0                                     | 0        | 0        | 0        | 0        | 0        | 0        | 0        | 0        |
| Buchnera                  | aphidicola          | ( <i>Cinara tujaefilina</i> )                                     | 0                                     | 0        | 0        | 0        | 0        | 0        | 0        | 0        | 0        |
| Buchnera                  | aphidicola          | BCc                                                               | 0                                     | 0        | 0        | 0        | 0        | 0        | 0        | 0        | 0        |
| Buchnera                  | aphidicola          | str. 5A ( <i>Acyrtosiphon pisum</i> )                             | 0                                     | 0        | 0        | 0        | 0        | 0        | 0        | 0        | 0        |
| Buchnera                  | aphidicola          | str. Ak ( <i>Acyrtosiphon kondoi</i> )                            | 0                                     | 0        | 0        | 0        | 0        | 0        | 0        | 0        | 0        |
| Buchnera                  | aphidicola          | str. APS ( <i>Acyrtosiphon pisum</i> )                            | 0                                     | 0        | 0        | 0        | 0        | 0        | 0        | 0        | 0        |
| Buchnera                  | aphidicola          | str. Bp ( <i>Baizongia pistaciae</i> )                            | 0                                     | 0        | 0        | 0        | 0        | 0        | 0        | 0        | 0        |
| Buchnera                  | aphidicola          | str. JF98 ( <i>Acyrtosiphon pisum</i> )                           | 0                                     | 0        | 0        | 0        | 0        | 0        | 0        | 0        | 0        |
| Buchnera                  | aphidicola          | str. JF99 ( <i>Acyrtosiphon pisum</i> )                           | 0                                     | 0        | 0        | 0        | 0        | 0        | 0        | 0        | 0        |
| Buchnera                  | aphidicola          | str. LL01 ( <i>Acyrtosiphon pisum</i> )                           | 0                                     | 0        | 0        | 0        | 0        | 0        | 0        | 0        | 0        |
| Buchnera                  | aphidicola          | str. Sg ( <i>Schizaphis graminum</i> )                            | 0                                     | 0        | 0        | 0        | 0        | 0        | 0        | 0        | 0        |
| Buchnera                  | aphidicola          | str. TLW03 ( <i>Acyrtosiphon pisum</i> )                          | 0                                     | 0        | 0        | 0        | 0        | 0        | 0        | 0        | 0        |
| Buchnera                  | aphidicola          | str. Tuc7 ( <i>Acyrtosiphon pisum</i> )                           | 0                                     | 0        | 0        | 0        | 0        | 0        | 0        | 0        | 0        |
| Buchnera                  | aphidicola          | str. Ua ( <i>Uroleucon ambrosiae</i> )                            | 0                                     | 0        | 0        | 0        | 0        | 0        | 0        | 0        | 0        |
| Candidatus                | Blochmannia         | chromaiodes str. 640                                              | 0                                     | 0        | 0        | 0        | 0        | 0        | 0        | 0        | 0        |
| Candidatus                | Blochmannia         | floridanus                                                        | 0                                     | 0        | 0        | 0        | 0        | 0        | 0        | 0        | 0        |
| Candidatus                | Blochmannia         | pennsylvanicus str. BPEN                                          | 0                                     | 0        | 0        | 0        | 0        | 0        | 0        | 0        | 0        |
| Candidatus                | Blochmannia         | vafer str. BVAf                                                   | 0                                     | 0        | 0        | 0        | 0        | 0        | 0        | 0        | 0        |
| Candidatus                | Hamiltonella        | defensa 5AT ( <i>Acyrtosiphon pisum</i> )                         | 0                                     | 0        | 0        | 0        | 0        | 0        | 0        | 0        | 0        |
| Candidatus                | Moranella           | endobia PCIT                                                      | 0                                     | 0        | 0        | 0        | 0        | 0        | 0        | 0        | 0        |
| Candidatus                | Moranella           | endobia PCVAL                                                     | 0                                     | 0        | 0        | 0        | 0        | 0        | 0        | 0        | 0        |
| Candidatus                | Riesia              | pediculicola USDA                                                 | 0                                     | 0        | 0        | 0        | 0        | 0        | 0        | 0        | 0        |
| <b>Citrobacter</b>        | <b>koseri</b>       | <b>ATCC BAA-895</b>                                               | <b>14</b>                             | <b>1</b> | <b>1</b> | <b>0</b> | <b>0</b> | <b>1</b> | <b>1</b> | <b>1</b> | <b>1</b> |
| <b>Citrobacter</b>        | <b>rodentium</b>    | <b>ICC168</b>                                                     | <b>7</b>                              | <b>1</b> | <b>1</b> | <b>0</b> | <b>0</b> | <b>1</b> | <b>1</b> | <b>1</b> | <b>1</b> |
| <b>Cronobacter</b>        | <b>sakazakii</b>    | <b>ATCC BAA-894</b>                                               | <b>26</b>                             | <b>1</b> | <b>1</b> | <b>0</b> | <b>0</b> | <b>1</b> | <b>1</b> | <b>1</b> | <b>1</b> |
| Cronobacter               | sakazakii           | ES15                                                              | 23                                    | 1        | 1        | 0        | 0        | 1        | 1        | 1        | 1        |
| Cronobacter               | sakazakii           | SP291                                                             | 26                                    | 1        | 1        | 0        | 0        | 1        | 1        | 1        | 1        |
| <b>Cronobacter</b>        | <b>turicensis</b>   | <b>z3032</b>                                                      | <b>28</b>                             | <b>1</b> | <b>1</b> | <b>0</b> | <b>0</b> | <b>1</b> | <b>1</b> | <b>1</b> | <b>1</b> |
| <b>Dickeya</b>            | <b>dadantii</b>     | <b>3937</b>                                                       | <b>47</b>                             | <b>1</b> | <b>1</b> | <b>0</b> | <b>0</b> | <b>1</b> | <b>1</b> | <b>1</b> | <b>1</b> |
| Dickeya                   | dadantii            | Ech586                                                            | 48                                    | 1        | 1        | 0        | 0        | 1        | 1        | 1        | 1        |
| Dickeya                   | dadantii            | Ech703                                                            | 42                                    | 1        | 1        | 0        | 0        | 1        | 1        | 1        | 1        |
| <b>Dickeya</b>            | <b>zeae</b>         | <b>Ech1591</b>                                                    | <b>42</b>                             | <b>1</b> | <b>1</b> | <b>0</b> | <b>0</b> | <b>1</b> | <b>1</b> | <b>1</b> | <b>1</b> |
| <b>Edwardsiella</b>       | <b>ictaluri</b>     | <b>93-146</b>                                                     | <b>9</b>                              | <b>1</b> | <b>1</b> | <b>0</b> | <b>0</b> | <b>1</b> | <b>0</b> | <b>1</b> | <b>1</b> |
| Edwardsiella              | tarda               | C07-087                                                           | 8                                     | 1        | 1        | 0        | 0        | 1        | 0        | 1        | 1        |
| Edwardsiella              | tarda               | EIB202                                                            | 8                                     | 1        | 1        | 0        | 0        | 1        | 0        | 1        | 1        |
| <b>Edwardsiella</b>       | <b>tarda</b>        | <b>FL6-60</b>                                                     | <b>8</b>                              | <b>1</b> | <b>1</b> | <b>0</b> | <b>0</b> | <b>1</b> | <b>0</b> | <b>1</b> | <b>1</b> |
| Enterobacter              | aerogenes           | EA1509E                                                           | 2                                     | 1        | 1        | 0        | 0        | 1        | 0        | 1        | 1        |
| <b>Enterobacter</b>       | <b>aerogenes</b>    | <b>KCTC 2190</b>                                                  | <b>2</b>                              | <b>1</b> | <b>1</b> | <b>0</b> | <b>0</b> | <b>1</b> | <b>0</b> | <b>1</b> | <b>1</b> |
| <b>Enterobacter</b>       | <b>asburiae</b>     | <b>LF7a</b>                                                       | <b>20</b>                             | <b>1</b> | <b>1</b> | <b>0</b> | <b>0</b> | <b>1</b> | <b>1</b> | <b>1</b> | <b>1</b> |
| <b>Enterobacter</b>       | <b>cloacae</b>      | <b>EcWSU1</b>                                                     | <b>17</b>                             | <b>1</b> | <b>1</b> | <b>0</b> | <b>0</b> | <b>1</b> | <b>1</b> | <b>1</b> | <b>1</b> |
| Enterobacter              | cloacae             | SCF1                                                              | 14                                    | 1        | 1        | 0        | 0        | 1        | 1        | 1        | 1        |
| Enterobacter              | cloacae             | subsp. cloacae ATCC 13047                                         | 16                                    | 2        | 2        | 0        | 0        | 2        | 1        | 2        | 2        |
| Enterobacter              | cloacae             | subsp. cloacae ENHKU01                                            | 16                                    | 1        | 1        | 0        | 0        | 1        | 1        | 1        | 1        |
| Enterobacter              | cloacae             | subsp. cloacae NCTC 9394                                          | 9                                     | 2        | 1        | 0        | 0        | 2        | 1        | 2        | 2        |
| Enterobacter              | cloacae             | subsp. dissolvens SDM                                             | 16                                    | 2        | 2        | 0        | 0        | 2        | 1        | 2        | 2        |
| <b>Enterobacter</b>       | <b>sp.</b>          | <b>638</b>                                                        | <b>18</b>                             | <b>1</b> | <b>1</b> | <b>0</b> | <b>0</b> | <b>1</b> | <b>1</b> | <b>1</b> | <b>1</b> |
| <b>Enterobacteriaceae</b> | <b>bacterium</b>    | <b>strain FGI 57</b>                                              | <b>6</b>                              | <b>1</b> | <b>1</b> | <b>0</b> | <b>0</b> | <b>1</b> | <b>0</b> | <b>1</b> | <b>1</b> |
| Erwinia                   | amylovora           | ATCC 49946                                                        | 11                                    | 2        | 2        | 0        | 0        | 2        | 1        | 2        | 2        |
| Erwinia                   | amylovora           | CFBP1430                                                          | 11                                    | 2        | 2        | 0        | 0        | 2        | 1        | 2        | 2        |
| <b>Erwinia</b>            | <b>billingiae</b>   | <b>Eb661</b>                                                      | <b>29</b>                             | <b>1</b> | <b>1</b> | <b>0</b> | <b>0</b> | <b>1</b> | <b>1</b> | <b>1</b> | <b>1</b> |
| Erwinia                   | pyrifoliae          | DSM 12163                                                         | 13                                    | 2        | 2        | 0        | 0        | 2        | 1        | 2        | 2        |
| Erwinia                   | pyrifoliae          | Ep1/96                                                            | 13                                    | 2        | 2        | 0        | 0        | 2        | 1        | 2        | 2        |
| Erwinia                   | sp.                 | Ejp617                                                            | 13                                    | 2        | 2        | 0        | 0        | 2        | 1        | 2        | 2        |
| <b>Erwinia</b>            | <b>tasmaniensis</b> | <b>Et1/99</b>                                                     | <b>13</b>                             | <b>1</b> | <b>1</b> | <b>0</b> | <b>0</b> | <b>1</b> | <b>1</b> | <b>1</b> | <b>1</b> |
| Escherichia               | blatae              | DSM 4481                                                          | 0                                     | 0        | 0        | 0        | 0        | 0        | 0        | 0        | 0        |
| Escherichia               | coli                | 42                                                                | 5                                     | 1        | 1        | 0        | 0        | 1        | 0        | 1        | 1        |
| Escherichia               | coli                | 536                                                               | 3                                     | 1        | 1        | 0        | 0        | 1        | 0        | 1        | 1        |
| Escherichia               | coli                | 55989                                                             | 5                                     | 1        | 1        | 0        | 0        | 1        | 0        | 1        | 1        |
| Escherichia               | coli                | ABU 83972                                                         | 4                                     | 1        | 1        | 0        | 0        | 1        | 0        | 1        | 1        |
| Escherichia               | coli                | APEC O1                                                           | 4                                     | 1        | 1        | 0        | 0        | 1        | 0        | 1        | 1        |
| Escherichia               | coli                | APEC O78                                                          | 5                                     | 1        | 1        | 0        | 0        | 1        | 0        | 1        | 1        |
| Escherichia               | coli                | ATCC 8739                                                         | 5                                     | 1        | 1        | 0        | 0        | 1        | 0        | 1        | 1        |
| Escherichia               | coli                | B str. REL606                                                     | 5                                     | 1        | 1        | 0        | 0        | 1        | 0        | 1        | 1        |
| Escherichia               | coli                | BL21(DE3)                                                         | 5                                     | 1        | 1        | 0        | 0        | 1        | 0        | 1        | 1        |
| Escherichia               | coli                | BL21(DE3)                                                         | 5                                     | 1        | 1        | 0        | 0        | 1        | 0        | 1        | 1        |
| Escherichia               | coli                | 'BL21-Gold(DE3)pLysS AG'                                          | 5                                     | 1        | 1        | 0        | 0        | 1        | 0        | 1        | 1        |
| Escherichia               | coli                | BW2952                                                            | 5                                     | 1        | 1        | 0        | 0        | 1        | 0        | 1        | 1        |
| Escherichia               | coli                | CFT073                                                            | 4                                     | 1        | 1        | 0        | 0        | 1        | 0        | 1        | 1        |
| Escherichia               | coli                | DH1                                                               | 5                                     | 1        | 1        | 0        | 0        | 1        | 0        | 1        | 1        |

|                       |                     |                                                  |           |          |          |          |          |          |          |          |          |
|-----------------------|---------------------|--------------------------------------------------|-----------|----------|----------|----------|----------|----------|----------|----------|----------|
| Escherichia           | coli                | DH1                                              | 5         | 1        | 1        | 0        | 0        | 1        | 0        | 1        | 1        |
| Escherichia           | coli                | E24377A                                          | 5         | 1        | 1        | 0        | 0        | 1        | 0        | 1        | 1        |
| Escherichia           | coli                | ED1a                                             | 3         | 1        | 1        | 0        | 0        | 1        | 0        | 1        | 1        |
| Escherichia           | coli                | ETEC H10407                                      | 5         | 1        | 1        | 0        | 0        | 1        | 0        | 1        | 1        |
| Escherichia           | coli                | HS                                               | 5         | 1        | 1        | 0        | 0        | 1        | 0        | 1        | 1        |
| Escherichia           | coli                | IA11                                             | 5         | 1        | 1        | 0        | 0        | 1        | 0        | 1        | 1        |
| Escherichia           | coli                | IAI39                                            | 3         | 1        | 1        | 0        | 0        | 1        | 0        | 1        | 1        |
| Escherichia           | coli                | IHE3034                                          | 4         | 1        | 1        | 0        | 0        | 1        | 0        | 1        | 1        |
| Escherichia           | coli                | KO11FL                                           | 5         | 1        | 1        | 0        | 0        | 1        | 0        | 1        | 1        |
| Escherichia           | coli                | KO11FL                                           | 5         | 1        | 1        | 0        | 0        | 1        | 0        | 1        | 1        |
| Escherichia           | coli                | LF82                                             | 3         | 1        | 1        | 0        | 0        | 1        | 0        | 1        | 1        |
| Escherichia           | coli                | NA114                                            | 4         | 1        | 1        | 0        | 0        | 1        | 0        | 1        | 1        |
| Escherichia           | coli                | O103:H2 str. 12009                               | 4         | 1        | 1        | 0        | 0        | 1        | 0        | 1        | 1        |
| Escherichia           | coli                | O104:H4 str. 2009EL-2050                         | 5         | 1        | 1        | 0        | 0        | 1        | 0        | 1        | 1        |
| Escherichia           | coli                | O104:H4 str. 2009EL-2071                         | 5         | 1        | 1        | 0        | 0        | 1        | 0        | 1        | 1        |
| Escherichia           | coli                | O104:H4 str. 2011C-3493                          | 5         | 1        | 1        | 0        | 0        | 1        | 0        | 1        | 1        |
| Escherichia           | coli                | O111:H- str. 11128                               | 5         | 1        | 1        | 0        | 0        | 1        | 0        | 1        | 1        |
| Escherichia           | coli                | O127:H6 str. E2348/69                            | 3         | 1        | 1        | 0        | 0        | 1        | 0        | 1        | 1        |
| Escherichia           | coli                | O157:H7 str. EC4115                              | 5         | 1        | 1        | 0        | 0        | 1        | 0        | 1        | 1        |
| Escherichia           | coli                | O157:H7 str. EDL933                              | 5         | 1        | 1        | 0        | 0        | 1        | 0        | 1        | 1        |
| Escherichia           | coli                | O157:H7 str. Sakai                               | 5         | 1        | 1        | 0        | 0        | 1        | 0        | 1        | 1        |
| Escherichia           | coli                | O157:H7 str. TW14359                             | 5         | 1        | 1        | 0        | 0        | 1        | 0        | 1        | 1        |
| Escherichia           | coli                | O26:H11 str. 11368                               | 5         | 1        | 1        | 0        | 0        | 1        | 0        | 1        | 1        |
| Escherichia           | coli                | O55:H7 str. CB9615                               | 5         | 1        | 1        | 0        | 0        | 1        | 0        | 1        | 1        |
| Escherichia           | coli                | O55:H7 str. RM12579                              | 4         | 1        | 1        | 0        | 0        | 1        | 0        | 1        | 1        |
| Escherichia           | coli                | O7:K1 str. CE10                                  | 4         | 1        | 1        | 0        | 0        | 1        | 0        | 1        | 1        |
| Escherichia           | coli                | O83:H1 str. NRG 857C                             | 4         | 1        | 1        | 0        | 0        | 1        | 0        | 1        | 1        |
| Escherichia           | coli                | P12b                                             | 4         | 1        | 1        | 0        | 0        | 1        | 0        | 1        | 1        |
| Escherichia           | coli                | S88                                              | 3         | 1        | 1        | 0        | 0        | 1        | 0        | 1        | 1        |
| Escherichia           | coli                | SE11                                             | 5         | 1        | 1        | 0        | 0        | 1        | 0        | 1        | 1        |
| Escherichia           | coli                | SE15                                             | 4         | 1        | 1        | 0        | 0        | 1        | 0        | 1        | 1        |
| Escherichia           | coli                | SMS-3-5                                          | 5         | 1        | 1        | 0        | 0        | 1        | 0        | 1        | 1        |
| Escherichia           | coli                | str. 'clone D i14'                               | 4         | 1        | 1        | 0        | 0        | 1        | 0        | 1        | 1        |
| Escherichia           | coli                | str. 'clone D i2'                                | 4         | 1        | 1        | 0        | 0        | 1        | 0        | 1        | 1        |
| Escherichia           | coli                | str. K-12 substr. DH10B                          | 4         | 0        | 1        | 0        | 0        | 1        | 0        | 1        | 1        |
| Escherichia           | coli                | str. K-12 substr. MDS42                          | 2         | 0        | 0        | 0        | 0        | 0        | 0        | 0        | 0        |
| Escherichia           | coli                | str. K-12 substr. MG1655                         | 5         | 1        | 1        | 0        | 0        | 1        | 0        | 1        | 1        |
| <b>Escherichia</b>    | <b>coli</b>         | <b>str. K-12 substr. W3110</b>                   | <b>5</b>  | <b>1</b> | <b>1</b> | <b>0</b> | <b>0</b> | <b>1</b> | <b>0</b> | <b>1</b> | <b>1</b> |
| Escherichia           | coli                | UM146                                            | 4         | 1        | 1        | 0        | 0        | 1        | 0        | 1        | 1        |
| Escherichia           | coli                | UMN026                                           | 5         | 1        | 1        | 0        | 0        | 1        | 0        | 1        | 1        |
| Escherichia           | coli                | UMNK88                                           | 5         | 1        | 1        | 0        | 0        | 1        | 0        | 1        | 1        |
| Escherichia           | coli                | UTI89                                            | 4         | 1        | 1        | 0        | 0        | 1        | 0        | 1        | 1        |
| Escherichia           | coli                | W                                                | 5         | 1        | 1        | 0        | 0        | 1        | 0        | 1        | 1        |
| Escherichia           | coli                | W                                                | 5         | 1        | 1        | 0        | 0        | 1        | 0        | 1        | 1        |
| Escherichia           | coli                | Xuzhou21                                         | 5         | 1        | 1        | 0        | 0        | 1        | 0        | 1        | 1        |
| <b>Escherichia</b>    | <b>fergusonii</b>   | <b>ATCC 35469</b>                                | <b>3</b>  | <b>1</b> | <b>1</b> | <b>0</b> | <b>0</b> | <b>1</b> | <b>1</b> | <b>1</b> | <b>1</b> |
| Klebsiella            | oxytoca             | E718                                             | 0         | 0        | 0        | 0        | 0        | 0        | 0        | 0        | 0        |
| Klebsiella            | oxytoca             | KCTC 1686                                        | 0         | 0        | 0        | 0        | 0        | 0        | 0        | 0        | 0        |
| Klebsiella            | pneumoniae          | 342                                              | 0         | 0        | 0        | 0        | 0        | 0        | 0        | 0        | 0        |
| Klebsiella            | pneumoniae          | KCTC 2242                                        | 0         | 0        | 0        | 0        | 0        | 0        | 0        | 0        | 0        |
| Klebsiella            | pneumoniae          | subsp. pneumoniae 1084                           | 0         | 0        | 0        | 0        | 0        | 0        | 0        | 0        | 0        |
| Klebsiella            | pneumoniae          | subsp. pneumoniae HS11286                        | 2         | 0        | 0        | 0        | 0        | 0        | 0        | 0        | 0        |
| Klebsiella            | pneumoniae          | subsp. pneumoniae MGH 78578                      | 0         | 0        | 0        | 0        | 0        | 0        | 0        | 0        | 0        |
| Klebsiella            | pneumoniae          | subsp. pneumoniae NTUH-K2044                     | 0         | 0        | 0        | 0        | 0        | 0        | 0        | 0        | 0        |
| Klebsiella            | varicola            | At-22                                            | 0         | 0        | 0        | 0        | 0        | 0        | 0        | 0        | 0        |
| <b>Morganella</b>     | <b>morganii</b>     | <b>subsp. morganii KT</b>                        | <b>9</b>  | <b>1</b> | <b>1</b> | <b>0</b> | <b>0</b> | <b>1</b> | <b>0</b> | <b>1</b> | <b>1</b> |
| <b>Pantoea</b>        | <b>ananatis</b>     | <b>AJ13355</b>                                   | <b>42</b> | <b>1</b> | <b>1</b> | <b>0</b> | <b>0</b> | <b>1</b> | <b>1</b> | <b>1</b> | <b>1</b> |
| Pantoea               | ananatis            | LMG 20103                                        | 42        | 1        | 1        | 0        | 0        | 1        | 1        | 1        | 1        |
| Pantoea               | ananatis            | LMG 5342                                         | 45        | 1        | 1        | 0        | 0        | 1        | 1        | 1        | 1        |
| Pantoea               | ananatis            | PA13                                             | 42        | 1        | 1        | 0        | 0        | 1        | 1        | 1        | 1        |
| <b>Pantoea</b>        | <b>sp.</b>          | <b>At-9b</b>                                     | <b>20</b> | <b>1</b> | <b>1</b> | <b>0</b> | <b>0</b> | <b>1</b> | <b>1</b> | <b>1</b> | <b>1</b> |
| <b>Pantoea</b>        | <b>vagans</b>       | <b>C9-1</b>                                      | <b>29</b> | <b>1</b> | <b>1</b> | <b>0</b> | <b>0</b> | <b>1</b> | <b>1</b> | <b>2</b> | <b>1</b> |
| <b>Pectobacterium</b> | <b>atrosepticum</b> | <b>SCRI1043</b>                                  | <b>36</b> | <b>1</b> | <b>1</b> | <b>0</b> | <b>0</b> | <b>1</b> | <b>1</b> | <b>1</b> | <b>1</b> |
| <b>Pectobacterium</b> | <b>carotovorum</b>  | <b>subsp. carotovorum PC1</b>                    | <b>37</b> | <b>1</b> | <b>1</b> | <b>0</b> | <b>0</b> | <b>1</b> | <b>1</b> | <b>1</b> | <b>1</b> |
| Pectobacterium        | carotovorum         | subsp. carotovorum PCC21                         | 37        | 1        | 1        | 0        | 0        | 1        | 1        | 1        | 1        |
| <b>Pectobacterium</b> | <b>sp.</b>          | <b>SCC3193</b>                                   | <b>38</b> | <b>1</b> | <b>1</b> | <b>0</b> | <b>0</b> | <b>1</b> | <b>1</b> | <b>1</b> | <b>1</b> |
| Pectobacterium        | wasabiae            | WPP163                                           | 38        | 1        | 1        | 0        | 0        | 1        | 1        | 1        | 1        |
| <b>Photobacterium</b> | <b>asymbiotica</b>  |                                                  | <b>2</b>  | <b>1</b> | <b>1</b> | <b>0</b> | <b>0</b> | <b>1</b> | <b>0</b> | <b>1</b> | <b>1</b> |
| <b>Photobacterium</b> | <b>luminescens</b>  | <b>subsp. laumondii TTO1</b>                     | <b>2</b>  | <b>1</b> | <b>1</b> | <b>0</b> | <b>0</b> | <b>1</b> | <b>0</b> | <b>1</b> | <b>1</b> |
| <b>Proteus</b>        | <b>mirabilis</b>    | <b>HI4320</b>                                    | <b>9</b>  | <b>1</b> | <b>1</b> | <b>0</b> | <b>0</b> | <b>1</b> | <b>0</b> | <b>1</b> | <b>1</b> |
| <b>Providencia</b>    | <b>stuartii</b>     | <b>MRSN 2154</b>                                 | <b>5</b>  | <b>1</b> | <b>1</b> | <b>0</b> | <b>0</b> | <b>1</b> | <b>0</b> | <b>2</b> | <b>1</b> |
| Rahnella              | aquatilis           | CIP 78.65 = ATCC 33071                           | 17        | 1        | 1        | 0        | 0        | 1        | 1        | 1        | 1        |
| <b>Rahnella</b>       | <b>aquatilis</b>    | <b>HX2</b>                                       | <b>20</b> | <b>1</b> | <b>1</b> | <b>0</b> | <b>0</b> | <b>1</b> | <b>1</b> | <b>1</b> | <b>1</b> |
| <b>Rahnella</b>       | <b>sp.</b>          | <b>Y9602</b>                                     | <b>20</b> | <b>1</b> | <b>1</b> | <b>0</b> | <b>0</b> | <b>1</b> | <b>1</b> | <b>1</b> | <b>1</b> |
| Raoultella            | ornithinolytica     | B6                                               | 0         | 0        | 0        | 0        | 0        | 0        | 0        | 0        | 0        |
| <b>Salmonella</b>     | <b>bongori</b>      | <b>NCTC 12419</b>                                | <b>9</b>  | <b>1</b> | <b>1</b> | <b>0</b> | <b>0</b> | <b>1</b> | <b>1</b> | <b>1</b> | <b>1</b> |
| Salmonella            | enterica            | subsp. arizonae serovar 62:z4,z23:- str. RSK2980 | 8         | 1        | 1        | 0        | 0        | 1        | 1        | 1        | 1        |
| Salmonella            | enterica            | subsp. enterica serovar Agona str. SL483         | 8         | 1        | 1        | 0        | 0        | 1        | 1        | 1        | 1        |

|                    |                           |                                                            |           |          |          |          |          |          |          |          |          |
|--------------------|---------------------------|------------------------------------------------------------|-----------|----------|----------|----------|----------|----------|----------|----------|----------|
| Salmonella         | enterica                  | subsp. enterica serovar Choleraesuis str. SC-B67           | 9         | 1        | 1        | 0        | 0        | 1        | 1        | 1        | 1        |
| Salmonella         | enterica                  | subsp. enterica serovar Dublin str. CT_02021853            | 9         | 1        | 1        | 0        | 0        | 1        | 1        | 1        | 1        |
| Salmonella         | enterica                  | subsp. enterica serovar Enteritidis str. P125109           | 9         | 1        | 1        | 0        | 0        | 1        | 1        | 1        | 1        |
| Salmonella         | enterica                  | subsp. enterica serovar Gallinarum str. 287/91             | 8         | 1        | 1        | 0        | 0        | 1        | 1        | 1        | 1        |
| Salmonella         | enterica                  | subsp. enterica serovar Gallinarum/pullorum                | 9         | 1        | 1        | 0        | 0        | 1        | 1        | 1        | 1        |
| Salmonella         | enterica                  | subsp. enterica serovar Heidelberg str. B182               | 9         | 1        | 1        | 0        | 0        | 1        | 1        | 1        | 1        |
| Salmonella         | enterica                  | subsp. enterica serovar Heidelberg str. SL476              | 9         | 1        | 1        | 0        | 0        | 1        | 1        | 1        | 1        |
| Salmonella         | enterica                  | subsp. enterica serovar Javiana str. CFSAN001992           | 9         | 1        | 1        | 0        | 0        | 1        | 1        | 1        | 1        |
| Salmonella         | enterica                  | subsp. enterica serovar Newport str. SL254                 | 9         | 1        | 1        | 0        | 0        | 1        | 1        | 1        | 1        |
| Salmonella         | enterica                  | subsp. enterica serovar Paratyphi A str. AKU_12601         | 6         | 1        | 1        | 0        | 0        | 1        | 1        | 1        | 1        |
| Salmonella         | enterica                  | subsp. enterica serovar Paratyphi A str. ATCC 9150         | 6         | 1        | 1        | 0        | 0        | 1        | 1        | 1        | 1        |
| Salmonella         | enterica                  | subsp. enterica serovar Paratyphi B str. SPB7              | 9         | 1        | 1        | 0        | 0        | 1        | 1        | 1        | 1        |
| Salmonella         | enterica                  | subsp. enterica serovar Paratyphi C strain RKS4594         | 8         | 1        | 1        | 0        | 0        | 1        | 1        | 1        | 1        |
| Salmonella         | enterica                  | subsp. enterica serovar Schwarzengrund str. CVM19633       | 9         | 1        | 1        | 0        | 0        | 1        | 1        | 1        | 1        |
| <b>Salmonella</b>  | <b>enterica</b>           | <b>subsp. enterica serovar Typhi str. CT18</b>             | <b>6</b>  | <b>1</b> | <b>1</b> | <b>0</b> | <b>0</b> | <b>1</b> | <b>1</b> | <b>1</b> | <b>1</b> |
| Salmonella         | enterica                  | subsp. enterica serovar Typhi str. P-stx-12                | 7         | 1        | 1        | 0        | 0        | 1        | 1        | 1        | 1        |
| Salmonella         | enterica                  | subsp. enterica serovar Typhi str. Ty2                     | 6         | 1        | 1        | 0        | 0        | 1        | 1        | 1        | 1        |
| Salmonella         | enterica                  | subsp. enterica serovar Typhimurium str. 14028S            | 9         | 1        | 1        | 0        | 0        | 1        | 1        | 1        | 1        |
| Salmonella         | enterica                  | subsp. enterica serovar Typhimurium str. 798               | 9         | 1        | 1        | 0        | 0        | 1        | 1        | 1        | 1        |
| Salmonella         | enterica                  | subsp. enterica serovar Typhimurium str. D23580            | 9         | 1        | 1        | 0        | 0        | 1        | 1        | 1        | 1        |
| <b>Salmonella</b>  | <b>enterica</b>           | <b>subsp. enterica serovar Typhimurium str. LT2</b>        | <b>9</b>  | <b>1</b> | <b>1</b> | <b>0</b> | <b>0</b> | <b>1</b> | <b>1</b> | <b>1</b> | <b>1</b> |
| Salmonella         | enterica                  | subsp. enterica serovar Typhimurium str. SL1344            | 9         | 1        | 1        | 0        | 0        | 1        | 1        | 1        | 1        |
| Salmonella         | enterica                  | subsp. enterica serovar Typhimurium str. ST4/74            | 9         | 1        | 1        | 0        | 0        | 1        | 1        | 1        | 1        |
| Salmonella         | enterica                  | subsp. enterica serovar Typhimurium str. T000240           | 9         | 1        | 1        | 0        | 0        | 1        | 1        | 1        | 1        |
| Salmonella         | enterica                  | subsp. enterica serovar Typhimurium str. U288              | 9         | 1        | 1        | 0        | 0        | 1        | 1        | 1        | 1        |
| Salmonella         | enterica                  | subsp. enterica serovar Typhimurium str. UK-1              | 9         | 1        | 1        | 0        | 0        | 1        | 1        | 1        | 1        |
| <b>Serratia</b>    | <b>marcescens</b>         | <b>FGI94</b>                                               | <b>6</b>  | <b>1</b> | <b>1</b> | <b>0</b> | <b>0</b> | <b>1</b> | <b>0</b> | <b>1</b> | <b>1</b> |
| Serratia           | marcescens                | WW4                                                        | 7         | 1        | 1        | 0        | 0        | 1        | 0        | 1        | 1        |
| <b>Serratia</b>    | <b>plymuthica</b>         | <b>AS9</b>                                                 | <b>4</b>  | <b>1</b> | <b>1</b> | <b>0</b> | <b>0</b> | <b>1</b> | <b>0</b> | <b>1</b> | <b>1</b> |
| <b>Serratia</b>    | <b>proteamaculans</b>     | <b>568</b>                                                 | <b>6</b>  | <b>1</b> | <b>1</b> | <b>0</b> | <b>0</b> | <b>1</b> | <b>0</b> | <b>1</b> | <b>1</b> |
| <b>Serratia</b>    | <b>sp.</b>                | <b>AS12</b>                                                | <b>4</b>  | <b>1</b> | <b>1</b> | <b>0</b> | <b>0</b> | <b>1</b> | <b>0</b> | <b>1</b> | <b>1</b> |
| <b>Serratia</b>    | <b>sp.</b>                | <b>AS13</b>                                                | <b>4</b>  | <b>1</b> | <b>1</b> | <b>0</b> | <b>0</b> | <b>1</b> | <b>0</b> | <b>1</b> | <b>1</b> |
| Serratia           | symbiotica                | str. 'Cinara cedri'                                        | 0         | 0        | 0        | 0        | 0        | 0        | 0        | 0        | 0        |
| Shigella           | boydii                    | CDC 3083-94                                                | 4         | 1        | 1        | 0        | 0        | 1        | 0        | 1        | 1        |
| Shigella           | boydii                    | Sb227                                                      | 2         | 0        | 1        | 0        | 0        | 1        | 0        | 1        | 0        |
| Shigella           | dysenteriae               | Sd197                                                      | 2         | 0        | 0        | 0        | 0        | 0        | 0        | 0        | 0        |
| Shigella           | flexneri                  | 2002017                                                    | 4         | 1        | 1        | 0        | 0        | 1        | 0        | 1        | 1        |
| Shigella           | flexneri                  | 2a str. 2457T                                              | 4         | 1        | 1        | 0        | 0        | 1        | 0        | 1        | 1        |
| Shigella           | flexneri                  | 2a str. 301                                                | 4         | 1        | 1        | 0        | 0        | 1        | 0        | 1        | 1        |
| Shigella           | flexneri                  | 5 str. 8401                                                | 4         | 1        | 1        | 0        | 0        | 1        | 0        | 1        | 1        |
| Shigella           | sonnei                    | Ss046                                                      | 4         | 1        | 1        | 0        | 0        | 1        | 0        | 1        | 1        |
| Sodalis            | glossiniidius             | str. 'morsitans'                                           | 0         | 0        | 1        | 0        | 0        | 0        | 0        | 1        | 1        |
| Wigglesworthia     | glossinidia               | endosymbiont of Glossina brevipalpis                       | 0         | 0        | 0        | 0        | 0        | 0        | 0        | 0        | 0        |
| Wigglesworthia     | glossinidia               | endosymbiont of Glossina morsitans morsitans (Yale colony) | 0         | 0        | 0        | 0        | 0        | 0        | 0        | 0        | 0        |
| <b>Xenorhabdus</b> | <b>bovienii</b>           | <b>SS-2004</b>                                             | <b>2</b>  | <b>1</b> | <b>1</b> | <b>0</b> | <b>0</b> | <b>1</b> | <b>0</b> | <b>1</b> | <b>1</b> |
| <b>Xenorhabdus</b> | <b>nematophila</b>        | <b>ATCC 19061</b>                                          | <b>2</b>  | <b>1</b> | <b>1</b> | <b>0</b> | <b>0</b> | <b>1</b> | <b>0</b> | <b>1</b> | <b>1</b> |
| <b>Yersinia</b>    | <b>enterocolitica</b>     | <b>subsp. enterocolitica 8081</b>                          | <b>12</b> | <b>1</b> | <b>1</b> | <b>0</b> | <b>0</b> | <b>1</b> | <b>1</b> | <b>1</b> | <b>1</b> |
| Yersinia           | enterocolitica            | subsp. palearctica 105.5R(r)                               | 11        | 1        | 1        | 0        | 0        | 1        | 1        | 1        | 1        |
| Yersinia           | enterocolitica            | subsp. palearctica Y11                                     | 11        | 1        | 1        | 0        | 0        | 1        | 1        | 1        | 1        |
| Yersinia           | pestis                    | A1122                                                      | 8         | 1        | 1        | 0        | 0        | 1        | 0        | 1        | 1        |
| Yersinia           | pestis                    | Angola                                                     | 7         | 1        | 1        | 0        | 0        | 1        | 0        | 1        | 1        |
| Yersinia           | pestis                    | Antiqua                                                    | 9         | 1        | 1        | 0        | 0        | 1        | 0        | 1        | 1        |
| Yersinia           | pestis                    | biovar Medievalis str. Harbin 35                           | 7         | 1        | 1        | 0        | 0        | 1        | 0        | 1        | 1        |
| Yersinia           | pestis                    | biovar Microtus str. 91001                                 | 7         | 1        | 1        | 0        | 0        | 1        | 0        | 1        | 1        |
| Yersinia           | pestis                    | CO92                                                       | 6         | 1        | 1        | 0        | 0        | 1        | 0        | 1        | 1        |
| Yersinia           | pestis                    | D106004                                                    | 9         | 1        | 1        | 0        | 0        | 1        | 0        | 1        | 1        |
| Yersinia           | pestis                    | D182038                                                    | 9         | 1        | 1        | 0        | 0        | 1        | 0        | 1        | 1        |
| Yersinia           | pestis                    | KIM10+                                                     | 7         | 1        | 1        | 0        | 0        | 1        | 0        | 1        | 1        |
| Yersinia           | pestis                    | Nepal516                                                   | 9         | 1        | 1        | 0        | 0        | 1        | 0        | 1        | 1        |
| Yersinia           | pestis                    | Pestoides F                                                | 9         | 1        | 1        | 0        | 0        | 1        | 0        | 1        | 1        |
| <b>Yersinia</b>    | <b>pestis</b>             | <b>Z176003</b>                                             | <b>9</b>  | <b>1</b> | <b>1</b> | <b>0</b> | <b>0</b> | <b>1</b> | <b>0</b> | <b>1</b> | <b>1</b> |
| Yersinia           | pseudotuberculosis        | IP 31758                                                   | 8         | 1        | 1        | 0        | 0        | 1        | 0        | 1        | 1        |
| <b>Yersinia</b>    | <b>pseudotuberculosis</b> | <b>IP 32953</b>                                            | <b>8</b>  | <b>1</b> | <b>1</b> | <b>0</b> | <b>0</b> | <b>1</b> | <b>0</b> | <b>1</b> | <b>1</b> |
| Yersinia           | pseudotuberculosis        | PB1/+                                                      | 8         | 1        | 1        | 0        | 0        | 1        | 0        | 1        | 1        |
| Yersinia           | pseudotuberculosis        | YP111                                                      | 7         | 1        | 1        | 0        | 0        | 1        | 0        | 1        | 1        |
