# Supplementary material for: Evolutionary Genomics Suggests That CheV Is an Additional Adaptor for Accommodating Specific Chemoreceptors within the Chemotaxis Signaling Complex
Source: PubMed Central journal article supplement (PMC4742279; doi:10.1371/journal.pcbi.1004723), 2016-02-04
Supplement: pcbi.1004723.s005.pdf [file pcbi.1004723.s005.pdf]

**S3 Fig. Multiple sequence alignment of CheA-P2 sequences from the non-redundant *Enterobacteriales* genome set.** Each sequence tag contains the first two letters of the genus, the first three letters of the species and the organism id in the MIST database, followed by the locus and accession number. The tag also includes the chemotaxis class for CheA (e.g. F7) and shows the presence (1CheV) or absence (0CheV) of *cheV* genes in a corresponding genome.

```

Ye.ent.378-YE2577-YP_001006780.1-F7-1CheV-1
Sa.ent.404-STY2130-NP_456487.1-F7-1CheV-1
Sa.ent.407-STM1921-NP_460878.1-F7-1CheV-1
Ph.asy.1114-PAU_02687-YP_003041521.1-F7-0CheV-1
Ye.pse.585-YPTB2405-YP_070919.1-F7-0CheV-1
Ye.pes.133-YPZ3_2033-YP_003568205.1-F7-0CheV-1
Es.col.1836-Y75_p1864-YP_490150.1-F7-0CheV-1
Pe.atr.485-ECA1689-YP_049790.1-F7-1CheV-1
Pectob.2320-W5S_1766-YP_006282729.1-F7-1CheV-1
Pe.car.1139-PC1_2611-YP_003018177.1-F7-1CheV-1
Sa.bon.1474-SBG_1757-YP_004730611.1-F7-1CheV-1
Ra.aqu.1678-Q7S_08670-YP_005401541.1-F7-1CheV-1
Rahnel.1320-Rahaq_1774-YP_004212519.1-F7-1CheV-1
Di.zea.1140-Dd1591_1540-YP_003003873.1-F7-1CheV-1
Ci.kos.578-CKO_01061-YP_001452640.1-F7-1CheV-1
Ci.rod.62-ROD_19411-YP_003365498.1-F7-1CheV-1
Di.dad.235-Dda3937_02781-YP_003883642.1-F7-1CheV-1
Xe.bov.105-XBJ1_1921-YP_003467825.1-F7-0CheV-1
Ed.tar.1771-ETAF_1247-YP_005698853.1-F7-0CheV-1
Ph.lum.1262-plu1851-NP_929124.1-F7-0CheV-1
Ed.ict.1187-NT01EI_1458-YP_002932879.2-F7-0CheV-1
En.aer.1436-EAE_15525-YP_004593295.1-F7-0CheV-1
Se.pro.864-Spro_2985-YP_001479214.1-F7-0CheV-1
Er.tas.1011-ETA_14620-YP_001907401.1-F7-1CheV-1
En.asb.1498-Entas_2599-YP_004829113.1-F7-1CheV-1
Se.ply.1407-SerAS9_3075-YP_004506455.1-F7-0CheV-1
Serrat.1408-SerAS12_3076-YP_004501502.1-F7-0CheV-1
Serrat.1901-SerAS13_3078-YP_006025917.1-F7-0CheV-1
Xe.nem.162-XNC1_1623-YP_003711884.1-F7-0CheV-1
En.638.865-Ent638_2466-YP_001177186.1-F7-1CheV-1
En.clo.1544-EcWSU1_02820-YP_004952673.1-F7-1CheV-1
Cr.sak.579-ESA_01341-YP_001437437.1-F7-1CheV-1
Es.fer.1173-EFER_1133-YP_002382295.1-F7-1CheV-1
Se.mar.2260-D781_2761-YP_007345197.1-F7-0CheV-1
Cr.tur.6-CTU_25850-YP_003210948.1-F7-1CheV-1
Er.bil.197-EbC_25380-YP_003741916.1-F7-1CheV-1
Pr.mir.1265-PMI1668-YP_002151399.1-F7-0CheV-1
En.bac.2261-D782_1745-YP_007339926.1-F7-0CheV-1
Pa.ana.1905-PAJ_1543-YP_005934419.1-F7-1CheV-1
Pa.vag.184-Pvag_1727-YP_003931364.1-F7-1CheV-1
Pantoe.297-Pat9b_1602-YP_004115475.1-F7-1CheV-1
Pr.stu.1965-S70_18125-YP_006218122.1-F7-0CheV-1
Mo.mor.2189-MU9_1760-YP_007505179.1-F7-0CheV-1
RIRLSGLKQEIPMLLEELGNLGEVQDPHQGADSLAETLITSVSEDDISAVLCFVLEPEQISF-
RIVLSRLKANEVDLLEELGNLATLTDVVKGADSLSATLDGSAEEDDIVAVLCFVIEADQIAFE
RIVLSRLKANEVDLLEELGNLATLTDVVKGADSLSATLDGSAEEDDIVAVLCFVIEADQIAFE
RVHLSGLKEREVSLMLEELGNLGEVYDAEQTRDSVEASLVTSATEDDITAVLCFVIEPEQITF-
RIRLSGLKAPESIMLMLEELGNLGEVQDPHQGADSLAETLITSVSEEDISAVLCFVLEPEQISF-
RIRLSGLKAPESIMLMLEELGNLGEVQDPHQGADSLAETLITSVSEEDISAVLCFVLEPEQISF-
-IILSRLKAGEVDLLEELGHLTTLTDVVKGADSLAAILPGDIAEDDITAVLCFVIEADQITFE
RIALTGLKSQEIPOMLLEELGNLGTVKDPHQDTDSVEVTLVTSSEDDISAVLCFVLEPEQISFK
RIALTGLKSQEIPOMLLEELGNLGTVKDPHQDTDSVEVTLVTSSEDDISAVLCFVLEPEQISFK
RIALTGLKSQEIPOMLLEELGNLGTVKDPHQDTDSVEVTLVTSSEDDISAVLCFVLEPEQISFK
RIVLSRLKANEVDLLEELGNLATLTDVVKGADSLSATLDGSAEEDIVAVLCFVIEADQIAFE
RVRLSGLKTQEIPOMLLEELGNLGEIKDPVQTDSDSVEATLVTTVSEDDI IAVLCFVLEPEQISFT
RVRLSGLKTQEIPOMLLEELGNLGEIKDPVQTDSDSVEATLVTTVSEDDI IAVLCFVLEPEQISFT
RIALTNLKESDIPQLEELGNLGTVKDTPVQTSSEVLTLDTSASEDDISAVLCFVLEPEQISFK
RVVLSRLKANEVDLLEELGNLATLTDVVKGEDSLSATLDGTAEDDITAVLCFVIEADQIAFE
RIVLSRLKANEVDLLEELGNLATLTDVVKGSDSLAATLDGDI AEDDITAVLCFVIEADQIAFE
RIALTNLKESDIPQLEELGNLGTVKDTAQTSTSVLTLTDSASEDDISAVLCFVLEPEQINFK
RVHLSGLKEREVSLMKDELGHLDVYDVEQTDASLEASLITSAATEDDITAVMCFVIEPEQITF-
-ISLTGLKAAEIPMLLEELGNLGTVQQHQESDSDALDVVLETTVSEDDITAVLCFVLEPEQIHFT
RVHLSGLKEREVSLMLEELGNLGEVYDAEQTRDSVEASLVTSATEDDITAVLCFVIEPEQITF-
-VSLTGLKPAEIPMLLEELGNLGTVQQHQESDSDSLEVLDTTTSASEDDITAVLCFVLEPEQIHFT
RVSLTGLKANEIPMLLEELGNLGEVHDPPQTDNSLEVTLTTSASEDDICAVLCFVLEPEQISFT
RICLSGLKSSEVPLMLEELGNLGEVKNPQQTENSLEVTLLTSASEDDISAVLCFVLEPEQISF-
RIQLTGLKVNVDLMLLEELANLGTVAASVVKGENSLAETLDSVVGKDDIVAVLCFVIDESQIHFF-
RVVLSRLKEREVNLLEELGNLAKLSNVVKGKDSLAAETLEDGISQDDIVAVLCFVIEADQIDFE
RVCLSGLPNEIPMLLEELGNLGEVKNPQQTESLEVTLLTSASEDDISAVLCFVLEPEQISF-
RVCLSGLPNEIPMLLEELGNLGEVKNPQQTESLEVTLLTSASEDDISAVLCFVLEPEQISF-
RIVLSRLKEREVSLMLEELGNLAKLSNVVKGKDSLAAETLEDGISQDDIVAVLCFVIEADQIAFE
RIKLGKLGNEIELLQEEELGNLGAISQIEKGADHLIATLETSASADDITAVLCFVIEGDIQIEF-
RIVLSRLKSKVDLLEELRNLATLSEVVKGEDSLAETLEGDIAQDDIVAVLCFVIEEDQIHFE
HISLTDLPNEIPMLLEELGNLGEVKNPQQSDSLSVTLTTSVSAEDISAVLCFVLEPEQIAF-
RIKLGKLGKGTETELLQEEELGNLGAISQIEKGEDYLVATLETSASADDITAVLCFVIEGDIQIEF-
RLALVDLKPNEIPMLLEELGNLGTSDVVKGETSVEVTLTDSVTDQDDIVAVLCFVIEEAQIQF-
--ILSDLKETDIDLMLDELKHLGEVSQVEKQHGLEAVLKTATQEDISAVLCFVIEPEQISF-
-ITLSRLKPGPEMLQEEELRNLATLSDVTLGVDSLSATLEGDVGNDIVAVLCFVIEADQISF-
--QLVDLKEKIDILMLLEELGNLGTSDVVKGKSNLECHIT-GVGKDDIVAVLCFVIDESQIRF-
RVQLIDLKREKVDLLEELGNLGTSLDVKGANLEATID-GVGKDDIVAVLCFVIEEAQIRF-
--TSLQKANEVDLLEELALFGTLYDTEKTADSLKAWLGTNTVDDICGVLCFVVDDESQIT--
---LSQLKRESEVALLADELSLFGTVYKTEQGTDTLEKVLGNTATDDISGVLCFVVDSDSQIA--

```
