# Supplementary material for: Evolutionary Genomics Suggests That CheV Is an Additional Adaptor for Accommodating Specific Chemoreceptors within the Chemotaxis Signaling Complex
Source: PubMed Central journal article supplement (PMC4742279; doi:10.1371/journal.pcbi.1004723), 2016-02-04

**S4 Fig. Conservation patterns in the CheA-P2 domains in organisms with CheV and without CheV.** Sequence logos were generated from the multiple sequence alignment shown in S3 Fig.

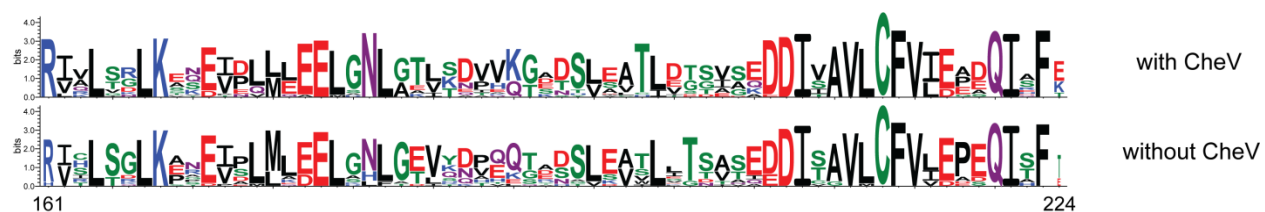

Supplement: pcbi.1004723.s006.pdf [file pcbi.1004723.s006.pdf]
