# Supplementary material for: Evolutionary Genomics Suggests That CheV Is an Additional Adaptor for Accommodating Specific Chemoreceptors within the Chemotaxis Signaling Complex
Source: PubMed Central journal article supplement (PMC4742279; doi:10.1371/journal.pcbi.1004723), 2016-02-04
Supplement: pcbi.1004723.s011.pdf [file pcbi.1004723.s011.pdf]

### S9 Fig. Multiple sequence alignment of chemoreceptors from COG1, COG2 and COG6.

Each sequence tag contains the first two letters of the genus, the first three letters of the species and the organism id in the MIST database, followed by the locus and accession number. The tag also includes the heptad class (e.g. 36H) and the COG to which a given sequence belongs.

```
Pr.mir.1265-PMI1666-YP_002151397.1--36H-COG1/1-568 -----
Di.dad.235-Dda3937_02779-YP_003883640.1--36H-COG1/1-566 -----
Di.zea.1140-Dd1591_1542-YP_003003875.1--36H-COG1/1-566 -----
Pe.atr.485-ECA1691-YP_049792.1--36H-COG1/1-561 -----
Se.pro.864-Spro_2983-YP_001479212.1--36H-COG1/1-556 -----
Ph.asy.1114-PAU_02685-YP_003041519.1--36H-COG1/1-564 -----
Pr.stu.1965-S70_18135-YP_006218124.1--36H-COG1/1-561 -----
Mo.mor.2189-MU9_1762-YP_007505181.1--36H-COG1/1-561 -----
Pe.car.1139-PC1_2609-YP_003018175.1--36H-COG1/1-561 -----
Xe.nem.162-XNC1_1620-YP_003711881.1--36H-COG1/1-567 -----
Pectob.2320-W5S_1768-YP_006282731.1--36H-COG1/1-561 -----
Pa.vag.184-Pvag_1723-YP_003931360.1--36H-COG1/1-558 -----
Ye.pes.133-YPZ3_2024-YP_003568196.1--36H-COG1/1-557 -----
Ye.pse.585-YPTB2401-YP_070915.1--36H-COG1/1-557 -----
Ye.ent.378-YE2575-YP_001006778.1--36H-COG1/1-557 -----
Pa.ana.1905-PAJ_1540-YP_005934416.1--36H-COG1/1-563 -----
Ph.lum.1262-plu1853-NP_929126.1--36H-COG1/1-564 -----
Serrat.1901-SerAS13_3075-YP_006025914.1--36H-COG1/1-555 -----
Sa.ent.404-STY2128-NP_456485.1--36H-COG1/1-553 -----
Ra.aqu.1678-Q7S_08960-YP_005401597.1--36H-COG1/1-564 -----
Se.mar.2260-D781_2759-YP_007345195.1--36H-COG1/1-555 -----
Rahnel.1320-Rahaq_1830-YP_004212575.1--36H-COG1/1-564 -----
Se.ply.1407-SerAS9_3072-YP_004506452.1--36H-COG1/1-555 -----
Ed.ict.1187-NT01EI_1461-YP_002932882.2--36H-COG1/1-555 -----
En.aer.1436-EAE_15535-YP_004593297.1--36H-COG1/1-556 -----
Xe.bov.105-XBJ1_1923-YP_003467827.1--36H-COG1/1-567 -----
Serrat.1408-SerAS12_3073-YP_004501499.1--36H-COG1/1-555 -----
Er.bil.197-EbC_25350-YP_003741913.1--36H-COG1/1-559 -----
Er.tas.1011-ETA_14650-YP_001907404.1--36H-COG1/1-554 -----
Sa.ent.407-STM4533-NP_463392.1--36H-COG1/1-553 -----
Es.col.1836-Y75_p4240-YP_492486.1--36H-COG1/1-551 -----
En.bac.2261-D782_3913-YP_007342002.1--36H-COG1/1-553 -----
Ci.kos.578-CRO_03442-YP_001454958.1--36H-COG1/1-554 -----
Cr.sak.579-ESA_03402-YP_001439456.1--36H-COG1/1-555 -----
Pantoe.297-Pat9b_1606-YP_004115479.1--36H-COG1/1-558 -----
Cr.tur.6-CTU_05670-YP_003208930.1--36H-COG1/1-555 -----
Sa.bon.1474-SBG_3944-YP_004732724.1--36H-COG1/1-553 -----
En.asb.1498-Entas_0547-YP_004827084.1--36H-COG1/1-554 -----
Ci.rod.62-ROD_48461-YP_003368233.1--36H-COG1/1-554 -----
Ed.tar.1771-ETAF_1249-YP_005698855.1--36H-COG1/1-529 -----
En.638.865-Ent638_0513-YP_001175251.1--36H-COG1/1-586 -----
Ed.ict.1187-NT01EI_1462-YP_002932883.1--36H-COG1/1-532 -----
Ye.ent.378-YE2573-YP_001006777.1--36H-COG1/1-545 -----
Ed.tar.1771-ETAF_1250-YP_005698856.1--36H-COG1/1-530 -----
Mo.mor.2189-MU9_1763-YP_007505182.1--36H-COG1/1-524 -----
En.aer.1436-EAE_15540-YP_004593298.1--36H-COG1/1-536 -----
En.638.865-Ent638_2456-YP_001177176.1--36H-COG1/1-533 -----
Se.pro.864-Spro_2982-YP_001479211.1--36H-COG1/1-541 -----
Es.col.1836-Y75_p1861-YP_490147.1--36H-COG1/1-533 -----
Serrat.1901-SerAS13_3074-YP_006025913.1--36H-COG1/1-541 -----
Ye.pes.133-YPZ3_2023-YP_003568195.1--36H-COG1/1-536 -----
Serrat.1408-SerAS12_3072-YP_004501498.1--36H-COG1/1-541 -----
Se.mar.2260-D781_2758-YP_007345194.1--36H-COG1/1-534 -----
Ye.pse.585-YPTB2400-YP_070914.1--36H-COG1/1-536 -----
Se.ply.1407-SerAS9_3071-YP_004506451.1--36H-COG1/1-541 -----
Pr.stu.1965-S70_18140-YP_006218125.1--36H-COG1/1-521 -----
En.bac.2261-D782_1749-YP_007339930.1--36H-COG1/1-533 -----
En.asb.1498-Entas_2590-YP_004829104.1--36H-COG1/1-533 -----
En.asb.1498-Entas_3672-YP_004830170.1--36H-COG1/1-545 -----
Ci.kos.578-CRO_01067-YP_001452646.1--36H-COG1/1-537 -----
En.clo.1544-EcWSU1_02810-YP_004952663.1--36H-COG1/1-538 -----
Sa.ent.407-STM3152-NP_462067.1--36H-COG1/1-547 -----
Pe.atr.485-ECA1332-YP_049438.1--36H-COG1/1-555 -----
Pe.car.1139-PC1_1208-YP_003016792.1--36H-COG1/1-555 -----
En.638.865-Ent638_3407-YP_001178118.1--36H-COG1/1-545 -----
Pa.vag.184-Pvag_1413-YP_003931052.1--36H-COG1/1-554 -----
Ph.asy.1114-PAU_02684-YP_003041518.1--36H-COG1/1-544 -----
Pa.ana.1905-PAJ_1316-YP_005934192.1--36H-COG1/1-556 -----
Ci.kos.578-CRO_04394-YP_001455885.1--36H-COG1/1-561 -----
Sa.bon.1474-SBG_2750-YP_004731563.1--36H-COG1/1-547 -----
Ra.aqu.1678-Q7S_16025-YP_005402985.1--36H-COG1/1-554 -----
Rahnel.1320-Rahaq_3177-YP_004213898.1--36H-COG1/1-554 -----
Pectob.2320-W5S_3114-YP_006284066.1--36H-COG1/1-555 -----
-----MNE-----
-----MTC-----SHANH--QHDFLKVFITQAENSVICLMER-----
-----M-----MG-----MG-----
-----MSP-----DGESLKYGKEIL-----
```

Ye.ent.378-YE2971-YP\_001007160.1--36H-COG1/1-552 -----  
 Er.bil.197-Ebc\_20190-YP\_003741400.1--36H-COG1/1-556 -----  
 Ph.lum.1262-plu1854-NP\_929127.1--36H-COG1/1-544 -----  
 Er.bil.197-Ebc\_25340-YP\_003741912.1--36H-COG1/1-528 -----  
 Di.zea.1140-Dd1591\_2937-YP\_003005238.1--36H-COG1/1-564 -----  
 Er.tas.1011-ETA\_14670-YP\_001907406.1--36H-COG1/1-518 -----  
 Sa.ent.404-STY4234-NP\_458344.1--36H-COG1/1-547 -----  
 Sa.ent.407-STM3577-NP\_462478.1--36H-COG1/1-547 -----  
 Sa.bon.1474-SBG\_3170-YP\_004731982.1--36H-COG1/1-547 -----  
 En.asb.1498-Entas\_2591-YP\_004829105.1--36H-COG1/1-555 -----  
 En.638.865-Ent638\_1858-YP\_001176586.1--36H-COG1/1-552 -----  
 Ci.rod.62-ROD\_19331-YP\_003365490.1--36H-COG1/1-553 -----  
 Di.dad.235-Dda3937\_01559-YP\_003882087.1--36H-COG1/1-566 -----MEST  
 Er.bil.197-Ebc\_37780-YP\_003743156.1--36H-COG1/1-553 -----  
 Pantoe.297-Pat9b\_2001-YP\_004115872.1--36H-COG1/1-558 -----  
 En.clo.1544-EcwsU1\_01962-YP\_004951821.1--36H-COG1/1-553 -----  
 En.asb.1498-Entas\_1879-YP\_004828403.1--36H-COG1/1-554 -----  
 En.bac.2261-D782\_1748-YP\_007339929.1--36H-COG1/1-547 -----  
 Es.col.1836-y75\_p1862-YP\_490148.1--36H-COG1/1-553 -----  
 Cr.tur.6-CTU\_33010-YP\_003211664.1--36H-COG1/1-555 -----  
 Cr.tur.6-CTU\_25780-YP\_003210941.1--36H-COG1/1-536 -----  
 En.clo.1544-EcwsU1\_00403-YP\_004950264.1--36H-COG1/1-549 -----  
 En.638.865-Ent638\_2457-YP\_001177177.1--36H-COG1/1-555 -----  
 Sa.bon.1474-SBG\_1755-YP\_004730609.1--36H-COG1/1-553 -----  
 Pr.mir.1265-PMI1665-YP\_002151396.1--36H-COG1/1-548 -----  
 Cr.sak.579-ESA\_01348-YP\_001437444.1--36H-COG1/1-556 -----  
 Cr.sak.579-ESA\_00560-YP\_001436686.1--36H-COG1/1-555 -----  
 Sa.ent.407-STM1919-NP\_460876.1--36H-COG1/1-553 -----  
 Ci.kos.578-CKO\_01066-YP\_001452645.1--36H-COG1/1-552 -----  
 En.asb.1498-Entas\_0424-YP\_004826963.1--36H-COG1/1-549 -----  
 Pantoe.297-Pat9b\_1273-YP\_004115150.1--36H-COG1/1-553 -----  
 Ed.tar.1771-ETAF\_2264-YP\_005699859.1--36H-COG1/1-555 -----  
 Pa.ana.1905-PAJ\_3534-YP\_005936409.1--36H-COG1/1-553 -----  
 Pa.vag.184-Pvag\_1203-YP\_003930842.1--36H-COG1/1-552 -----  
 Pantoe.297-Pat9b\_1605-YP\_004115478.1--36H-COG1/1-556 -----  
 Cr.sak.579-ESA\_00210-YP\_001436348.1--36H-COG1/1-557 -----  
 Er.tas.1011-ETA\_pET460340-YP\_001905943.1--36H-COG1/1-543 -----  
 Cr.tur.6-CTU\_36610-YP\_003212024.1--36H-COG1/1-557 -----  
 Pe.car.1139-PC1\_1159-YP\_003016743.1--36H-COG1/1-556 -----  
 Er.tas.1011-ETA\_14640-YP\_001907403.1--36H-COG1/1-554 -----  
 Pa.vag.184-Pvag\_1725-YP\_003931362.1--36H-COG1/1-556 -----  
 Ed.ict.1187-NT01EI\_3742-YP\_002935104.1--36H-COG1/1-525 -----  
 En.638.865-Ent638\_0380-YP\_001175119.1--36H-COG1/1-549 -----  
 Er.bil.197-Ebc\_25360-YP\_003741914.1--36H-COG1/1-556 -----  
 Er.tas.1011-ETA\_16910-YP\_001907630.1--36H-COG1/1-543 -----  
 Es.fer.1173-EFER\_3055-YP\_002384154.1--36H-COG1/1-603 -----MYHKQPRQSVTSLKQTQADSKIRLLNVPKHKVFSSQADNQSICLVER  
 Xe.nem.162-XNC1\_1619-YP\_003711880.1--36H-COG1/1-520 -----  
 En.clo.1544-EcwsU1\_02811-YP\_004952664.1--36H-COG1/1-559 -----MRR  
 Di.dad.235-Dda3937\_03500-YP\_003882750.1--36H-COG1/1-553 -----  
 Xe.bov.105-XBJ1\_1924-YP\_003467828.1--36H-COG1/1-523 -----  
 Rahnel.1320-Rahaq\_1831-YP\_004212576.1--36H-COG1/1-556 -----  
 Ra.aqu.1678-Q7S\_08965-YP\_005401598.1--36H-COG1/1-556 -----  
 Cr.sak.579-ESA\_01126-YP\_001437230.1--36H-COG1/1-514 -----  
 Pe.atr.485-ECA2712-YP\_050803.1--36H-COG1/1-560 -----  
 En.clo.1544-EcwsU1\_00560-YP\_004950421.1--36H-COG1/1-597 -----MNWG-----TGISQRAKSKNHFKDDFRKVFPPQAEANPVICLMES  
 Di.dad.235-Dda3937\_03498-YP\_003882752.1--36H-COG1/1-561 -----  
 Cr.tur.6-CTU\_27880-YP\_003211151.1--36H-COG1/1-514 -----  
 Pe.car.1139-PC1\_1669-YP\_003017246.1--36H-COG1/1-560 -----  
 Ra.aqu.1678-Q7S\_14450-YP\_005402672.1--36H-COG1/1-551 -----  
 Ci.kos.578-CKO\_03622-YP\_001455137.1--36H-COG1/1-517 -----  
 Di.zea.1140-Dd1591\_2408-YP\_003004728.1--36H-COG1/1-557 -----  
 Di.zea.1140-Dd1591\_2406-YP\_003004726.1--36H-COG1/1-559 -----  
 Ed.ict.1187-NT01EI\_2801-YP\_002934203.1--36H-COG1/1-554 -----  
 Pe.car.1139-PC1\_1384-YP\_003016966.1--36H-COG1/1-559 -----  
 Rahnel.1320-Rahaq\_2866-YP\_004213595.1--36H-COG1/1-551 -----  
 Pe.atr.485-ECA1281-YP\_049387.1--36H-COG1/1-556 -----  
 Pectob.2320-W5S\_1886-YP\_006282848.1--36H-COG1/1-549 -----  
 Pectob.2320-W5S\_1696-YP\_006282659.1--36H-COG1/1-559 -----  
 Di.zea.1140-Dd1591\_2407-YP\_003004727.1--36H-COG1/1-555 -----  
 Pe.atr.485-ECA1509-YP\_049611.1--36H-COG1/1-559 -----  
 Pa.vag.184-Pvag\_1724-YP\_003931361.1--36H-COG1/1-520 -----  
 Pa.ana.1905-PAJ\_1541-YP\_005934417.1--36H-COG1/1-520 -----  
 Mo.mor.2189-MU9\_1596-YP\_007505015.1--36H-COG1/1-519 -----  
 Pr.mir.1265-PMI2808-YP\_002152509.1--36H-COG1/1-563 -----  
 Di.zea.1140-Dd1591\_0395-YP\_003002764.1--36H-COG1/1-556 -----  
 En.clo.1544-EcwsU1\_03786-YP\_004953635.1--36H-COG1/1-515 -----  
 Pectob.2320-W5S\_3170-YP\_006284116.1--36H-COG1/1-556 -----  
 Di.dad.235-Dda3937\_02184-YP\_003884754.1--36H-COG1/1-556 -----  
 Ci.rod.62-ROD\_32641-YP\_003366748.1--36H-COG1/1-517 -----  
 Di.dad.235-Dda3937\_03499-YP\_003882751.1--36H-COG1/1-561 -----MI-----NCPPEPV  
 Di.dad.235-Dda3937\_00105-YP\_003883346.1--36H-COG1/1-561 -----  
 Pantoe.297-Pat9b\_1604-YP\_004115477.1--36H-COG1/1-555 -----  
 Er.tas.1011-ETA\_14660-YP\_001907405.1--36H-COG1/1-560 -----  
 Pr.mir.1265-PMI2809-YP\_002152510.1--36H-COG1/1-575 -----  
 Ed.tar.1771-ETAF\_3053-YP\_005700648.1--36H-COG1/1-516 -----  
 Se.pro.864-Spro\_1415-YP\_001477647.1--36H-COG1/1-546 -----  
 Di.zea.1140-Dd1591\_1804-YP\_003004134.1--36H-COG1/1-562 -----  
 Di.dad.235-Dda3937\_03501-YP\_003882749.1--36H-COG1/1-575 -----MTMINS-----RAMHAENDSEPV

|                                                          |                                |
|----------------------------------------------------------|--------------------------------|
| Pantoe.297-Pat9b_0851-YP_004114731.1--36H-COG2/1-524     | -----                          |
| Pa.vag.184-Pvag_0291-YP_003929953.1--36H-COG2/1-525      | -----                          |
| En.clo.1544-EcWSU1_03886-YP_004953735.1--36H-COG2/1-519  | -----                          |
| Cr.tur.6-CTU_04790-YP_003208842.1--36H-COG2/1-515        | -----                          |
| Cl.kos.578-CRO_04484-YP_001455975.1--36H-COG2/1-521      | -----                          |
| Cr.sak.579-ESA_03488-YP_001439539.1--36H-COG2/1-515      | -----                          |
| Ci.rod.62-ROD_48071-YP_003368199.1--36H-COG2/1-521       | -----                          |
| Sa.bon.1474-SBG_2851-YP_004731664.1--36H-COG2/1-521      | -----                          |
| Sa.ent.407-STM3216-NP_462130.1--36H-COG2/1-521           | -----                          |
| En.asb.1498-Entas_3753-YP_004830248.1--36H-COG2/1-519    | -----                          |
| Mo.mor.2189-MU9_3389-YP_007506806.1--36H-COG2/1-521      | -----                          |
| Sa.ent.404-STY3394-NP_457606.1--36H-COG2/1-522           | -----                          |
| En.638.865-Ent638_3526-YP_001178235.1--36H-COG2/1-519    | -----                          |
| Pe.atr.485-ECA1774-YP_049874.1--36H-COG2/1-554           | -----                          |
| En.638.865-Ent638_2119-YP_001176845.1--36H-COG2/1-549    | -----                          |
| Pectob.2320-W5S_2813-YP_006283770.1--36H-COG2/1-554      | -----                          |
| Di.zea.1140-Dd1591_0695-YP_003003055.1--36H-COG2/1-561   | -----                          |
| Pa.vag.184-Pvag_pPag30079-YP_003729820.1--36H-COG2/1-546 | -----                          |
| Er.bil.197-EbC_38940-YP_003743272.1--36H-COG2/1-526      | -----                          |
| Ra.aqu.1678-Q7S_24891-YP_005419232.1--36H-COG2/1-554     | -----M-----                    |
| En.asb.1498-Entas_2287-YP_004828805.1--36H-COG2/1-513    | -----M-----FSI                 |
| Rahnel.1320-Rahaq_4869-YP_004215574.1--36H-COG2/1-554    | -----M-----                    |
| Di.dad.235-Dda3937_00027-YP_003883574.1--36H-COG2/1-554  | -----                          |
| Pr.stu.1965-S70_05790-YP_006215722.1--36H-COG2/1-520     | -----                          |
| En.638.865-Ent638_2100-YP_001176826.1--36H-COG2/1-512    | -----MSF                       |
| Pe.car.1139-PC1_2526-YP_003018093.1--36H-COG2/1-554      | -----                          |
| Mo.mor.2189-MU9_702-YP_007504121.1--36H-COG2/1-525       | -----                          |
| Pe.car.1139-PC1_3443-YP_003018995.1--36H-COG2/1-511      | -----MLR-----                  |
| Pa.ana.1905-PAJ_0915-YP_005933791.1--36H-COG2/1-559      | -----MLTPTP-----               |
| Pectob.2320-W5S_3736-YP_006284671.1--36H-COG2/1-510      | -----MLR-----                  |
| Pe.atr.485-ECA0183-YP_048310.1--36H-COG2/1-553           | -----                          |
| Rahnel.1320-Rahaq_3107-YP_004213828.1--36H-COG2/1-503    | -----MNV-----LSGI              |
| Pe.car.1139-PC1_4071-YP_003019622.1--36H-COG2/1-553      | -----                          |
| Di.dad.235-Dda3937_03462-YP_003884507.1--36H-COG2/1-563  | -----                          |
| Ra.aqu.1678-Q7S_15665-YP_005402913.1--36H-COG2/1-503     | -----MNV-----LSGI              |
| Pectob.2320-W5S_4505-YP_006285423.1--36H-COG2/1-555      | -----                          |
| Pe.atr.485-ECA3642-YP_051730.1--36H-COG2/1-551           | -----                          |
| Pe.car.1139-PC1_1417-YP_003016999.1--36H-COG2/1-554      | -----                          |
| En.asb.1498-Entas_4509-YP_004821569.1--36H-COG2/1-559    | -----MDFL-----LQKWNC           |
| Pa.ana.1905-PAJ_3064-YP_005935940.1--36H-COG2/1-544      | -----                          |
| Pectob.2320-W5S_1733-YP_006282696.1--36H-COG2/1-535      | -----                          |
| Pe.atr.485-ECA4334-YP_052421.1--36H-COG2/1-556           | -----                          |
| Di.zea.1140-Dd1591_1602-YP_003003935.1--36H-COG2/1-554   | -----                          |
| Pectob.2320-W5S_4506-YP_006285424.1--36H-COG2/1-540      | -----                          |
| Di.zea.1140-Dd1591_1453-YP_003003794.1--36H-COG2/1-532   | -----                          |
| Pectob.2320-W5S_0106-YP_006281117.1--36H-COG2/1-556      | -----                          |
| Di.zea.1140-Dd1591_0769-YP_003003127.1--36H-COG2/1-505   | -----MLH-----                  |
| Ra.aqu.1678-Q7S_18035-YP_005403387.1--36H-COG2/1-535     | -----                          |
| Rahnel.1320-Rahaq_3579-YP_004214298.1--36H-COG2/1-535    | -----                          |
| Pe.car.1139-PC1_4072-YP_003019623.1--36H-COG2/1-540      | -----                          |
| Pe.car.1139-PC1_3464-YP_003019016.1--36H-COG2/1-551      | -----                          |
| Pe.car.1139-PC1_0111-YP_003015709.1--36H-COG2/1-556      | -----                          |
| Pe.atr.485-ECA0182-YP_048309.1--36H-COG2/1-542           | -----                          |
| Pectob.2320-W5S_3753-YP_006284688.1--36H-COG2/1-551      | -----                          |
| Pa.ana.1905-PAJ_2666-YP_005935542.1--36H-COG2/1-514      | -----                          |
| Ci.rod.62-ROD_16161-YP_003365194.1--36H-COG6/1-557       | -----MD-----NTSMQAPAK          |
| En.asb.1498-Entas_2095-YP_004828614.1--36H-COG6/1-563    | -----MD-----NTSMQAQHK          |
| En.638.865-Ent638_1961-YP_001176688.1--36H-COG6/1-563    | -----MD-----NTKMRSPQT          |
| Cr.sak.579-ESA_01710-YP_001437800.1--36H-COG6/1-565      | -----MN-----KTTTRDAGA          |
| Cr.tur.6-CTU_22440-YP_003210607.1--36H-COG6/1-565        | -----MK-----KTTTRDSGA          |
| Cl.kos.578-CRO_01456-YP_001453025.1--36H-COG6/1-562      | -----MD-----NTSTMQAPHK         |
| Rahnel.1320-Rahaq_1930-YP_004212674.1--36H-COG6/1-566    | -----MD-----MDTPTQLTTR         |
| Pantoe.297-Pat9b_2403-YP_004116261.1--36H-COG6/1-564     | -----MK-----TASIDEQNK          |
| Er.bil.197-EbC_26700-YP_003742048.1--36H-COG6/1-567      | -----MK-----SSHLNABQNG         |
| Pectob.2320-W5S_1760-YP_006282723.1--36H-COG6/1-570      | -----MK-----ITSRSEQHIK         |
| Pa.ana.1905-PAJ_1621-YP_005934497.1--36H-COG6/1-568      | -----MN-----TTLVNEGHSK         |
| En.clo.1544-EcWSU1_02120-YP_004951978.1--36H-COG6/1-576  | MFLRILPTRESTVMD-----NTLTMQAQRT |
| Ra.aqu.1678-Q7S_09815-YP_005401764.1--36H-COG6/1-566     | -----MD-----MDTPTQLTTR         |
| Ye.pse.585-YPTB2412-YP_070925.1--36H-COG6/1-579          | -----MK-----IAPENKDKT          |
| Ye.ent.378-YE2588-YP_001006789.1--36H-COG6/1-579         | -----MK-----MKRGSCHKPLDIK      |
| Di.dad.235-Dda3937_02787-YP_003883649.1--36H-COG6/1-572  | -----MK-----MMSKSEQQK          |
| Pa.vag.184-Pvag_1800-YP_003931435.1--36H-COG6/1-568      | -----MN-----TALDNDGQKS         |
| En.bac.2261-D782_2307-YP_007340470.1--36H-COG6/1-558     | -----MD-----KTKTQHQTQK         |
| Pe.atr.485-ECA1683-YP_049784.1--36H-COG6/1-573           | -----MDMK-----ITSRSEQHAE       |
| Pe.car.1139-PC1_2617-YP_003018183.1--36H-COG6/1-573      | -----MDMK-----ITSRSEQHAE       |
| Di.zea.1140-Dd1591_1535-YP_003003868.1--36H-COG6/1-574   | -----MK-----MMSKSEQQK          |
| Di.col.1140-Dd1591_3580-YP_003005868.1--36H-COG6/1-572   | -----MH-----TTALPSSSG          |
| Es.col.1836-Y75_p1397-YP_489687.1--36H-COG6/1-546        | -----MN-----TTPSQR             |
| Pe.atr.485-ECA3902-YP_051990.1--36H-COG6/1-575           | M-M-----VKMR-----MQSMSVQKEK    |
| Sa.bon.1474-SBG_1454-YP_004730321.1--36H-COG6/1-537      | -----MG-----NTLSIQASHK         |
| Sa.ent.407-STM1626-NP_460585.1--36H-COG6/1-541           | -----MG-----NTFSMQASHK         |
| Pe.car.1139-PC1_3679-YP_003019230.1--36H-COG6/1-567      | -----M-----MSIQKEK             |
| Pectob.2320-W5S_4020-YP_006284955.1--36H-COG6/1-575      | -----M-----VKMT-----MQSMSVQKEK |
| Di.zea.1140-Dd1591_0523-YP_003002884.1--36H-COG6/1-568   | -----M-----MAEQKGN             |
| Di.dad.235-Dda3937_02665-YP_003881279.1--36H-COG6/1-572  | -----MN-----TTAQSPSSPG         |





Pectob.2320-W5S\_2813-YP\_006283770.1--36H-COG2/1-554 -MGL-SNWRIGYRLGAGFSLVLMMLLIIGSVAISKLSDFHQKMDDIVSQNYPLTVKSNL  
Di.zea.1140-Dd1591\_0695-YP\_003003055.1--36H-COG2/1-561 -MRL-SDWRIYRGLGAGFAVLAVMLVFGVGLMSIAKLSGPHDDARIDVQKIYPTVDANAL  
Pa.vag.184-Pvag\_pPag30079-YP\_003729820.1--36H-COG2/1-546 ---M-NNRIGRTRLGAAFAFILLLLVIVAVFTGFSRIQSLGETADTLGASRYQKASAAATNL  
Er.bill.197-Ebc\_38940-YP\_003743272.1--36H-COG2/1-526 MASV-KNMKVGVRLLGAAFSVLVLLLIIVSVTAVVKTINTINDAVSSIVSDRYIKVRLAFDV  
Ra.aqu.1678-Q7S\_24891-YP\_005419232.1--36H-COG2/1-554 FKLI-NMVRGARGLGAFAFSLVLLLVIVSGIATIKSSINTSIEQIISDRYKVRVLAFDV  
En.asb.1498-Entas\_2287-YP\_004828805.1--36H-COG2/1-513 SLRL-RNIKMSRKLGAAGFGLVLLLVAVSTAMSVLRKFEIRDVYQQT-----NLIYNIN  
Rahnel.1320-Rahaq\_4869-YP\_004215574.1--36H-COG2/1-554 FKLI-NMVRGARGLGAFAFSLVLLLVIVSGIATIKSSINTSIEQIISDRYKVRVLAFDV  
Di.dad.235-Dda3937\_00027-YP\_003883574.1--36H-COG2/1-554 -MSF-SNFKIGYRLAIGFSFLIIMLLIAGAVALSNSLDFPNRMDYTVSELYPLTARGNQL  
Pr.stu.1965-S70\_05790-YP\_006215722.1--36H-COG2/1-520 -MSL-KDIKIGVRLTAFAFFIFLSSALSLISLNKANNQIDIIYKDYPMTVANQL  
En.638.865-Ent638\_2100-YP\_001176826.1--36H-COG2/1-512 SQRL-RNIKMSRKLGAAGFGLVLLLVAVSTAMSVLRKFEIRDVYQQT-----NLIYNIN  
Pe.car.1139-PC1\_2526-YP\_003018093.1--36H-COG2/1-554 -MSL-SNWRIGYRLGAGFSLVLMMLLVIGSVAISKLSDFHEKMDIEVSNYPLTVKSNL  
Mo.mor.2189-MU9\_702-YP\_007504121.1--36H-COG2/1-525 -MNL-KNTTIRVRLSVTFGLVIALALVSGMAMNLYKDKEMFTNYVNGTYALQVQAYEV  
Pe.car.1139-PC1\_3443-YP\_003018995.1--36H-COG2/1-511 WMSF-QNLSVTRKLLVGFGLLLIMGVLLSMVGFYGLHNSDQSLKRISR-----LGAMY  
Pa.ana.1905-PAJ\_0915-YP\_005933791.1--36H-COG2/1-559 GINM-NNRIGRTRLGITFGFMALVFMVLLIIVKINALGNANDDISGSLYTKASTSLSI  
Pectob.2320-W5S\_3736-YP\_006284671.1--36H-COG2/1-510 WMSF-QNLSVTRKLLVGFGLLLIMGVLLSMVGFYGLYNSDQSLKRISR-----LGATY  
Pe.atr.485-ECA0183-YP\_048310.1--36H-COG2/1-553 -MNL-ANWRIGYRLGAGFALLIVMLFVVSIFSLSKLSGFPQDSARSIVKDVYPTVDANNL  
Rahnel.1320-Rahaq\_3107-YP\_004213828.1--36H-COG2/1-503 AGRV-RHASIASKLGAAGFALLVLLGSPFIAVSGVYHLTSINQRAEKASLLKTVNDLLSDA-  
Pe.car.1139-PC1\_4071-YP\_003019622.1--36H-COG2/1-553 -MSL-ANWRIGYRLGAGFALLIILMLFVVSIFSLSKLSGFPQDSARSIVKDVYPTVDANNL  
Di.dad.235-Dda3937\_03462-YP\_003884507.1--36H-COG2/1-563 -MRL-SDWRIYRGLGAGFAVLAVMLVVGVLISITRSLSSPHDSARIDVQKIYPTVDANL  
Ra.aqu.1678-Q7S\_15665-YP\_005402913.1--36H-COG2/1-503 AGRV-RHASIASKLGAAGFALLVLLGSPFIAVSGVYHLTSINQRAEKASLLKTVNDLLSDA-  
Pectob.2320-W5S\_4505-YP\_006285423.1--36H-COG2/1-555 -MNL-ANWRIGYRLGAGFALLIILMLFAVVSIFSLSKLSGFPQDARGIVKDVYPTMDANNL  
Pe.atr.485-ECA3642-YP\_051730.1--36H-COG2/1-551 ---M-KNYKIGTRLAGGFGLLIALSLAMLTSGIYQLNQSSTQMMQEPPLRKRERLASDW  
Pe.car.1139-PC1\_1417-YP\_003019999.1--36H-COG2/1-554 MDFE-KNLSVTRKLLVGFGLLLIILFLVLSVGVYFMKDIETVDEITDRMPKVDMLRDI  
En.asb.1498-Entas\_4509-YP\_004821569.1--36H-COG2/1-559 IMNV-FNWKIGTRLAGGFGLLIALSLAMLTSGIYQLNQSSTQMMQEPPLRKRERLASDW  
Pa.ana.1905-PAJ\_3064-YP\_005933940.1--36H-COG2/1-544 ---M-NNRIGRTRLVAAFGFMGLVIFMVLIIGITKTRSLADANAEIAGGLYKAKESAML  
Pectob.2320-W5S\_1733-YP\_006282696.1--36H-COG2/1-535 -----MLIILTLILSAVGYFMKNIAGVVDGIDEDRMPKVDMLRDI  
Di.zea.1140-Dd1591\_1602-YP\_003003935.1--36H-COG2/1-554 MNLI-KNSSLGKMLGTGFTLVIAIGFLVAIFGRIQLDKLGENIQVLSQVRIANLLMMQEF  
Pectob.2320-W5S\_4506-YP\_006285424.1--36H-COG2/1-540 -MNL-SNLKIGYRLAIGFSFLVLMMLFISGAVALSNSLDFPNRMDYTVSELYPLTARGNQL  
Di.zea.1140-Dd1591\_1453-YP\_003003794.1--36H-COG2/1-532 -MNL-ANWRIGYRLGGGFAVLILMLFAVSLFSLSKLSGFPQDARGIVKDVYPTVDANL  
Pectob.2320-W5S\_0106-YP\_006281117.1--36H-COG2/1-556 -----MKISTRLWSTGMLSLGILMGAIGLFTAEBKANQSLKTVYEDRVTVLAQLEKL  
Di.zea.1140-Dd1591\_0769-YP\_003003127.1--36H-COG2/1-505 MNLI-KNSSLGKMLGTGFTLVIAIGFLVAIFGRIQLDKLGENIQVLSQVRIANLLMMQEF  
Ra.aqu.1678-Q7S\_18035-YP\_005403387.1--36H-COG2/1-535 HLSL-KNLPVTRKLLVGFGLLLIIGITLISLVGFSGLHNSDQSLKRISR-----LGSYI  
Rahnel.1320-Rahaq\_3579-YP\_004214298.1--36H-COG2/1-535 -MSF-KHTTVTRTQLTLGFGVLLVIVLAVVLLSINALSQANNRFRKTHVQQVSAREAAVNLI  
Pe.car.1139-PC1\_4072-YP\_003019623.1--36H-COG2/1-540 -MSF-KHTTVTRTQLTLGFGVLLVIVLAVVLLSINALSQANNRFRKTHVQQVSAREAAVNLI  
Pe.car.1139-PC1\_3464-YP\_003019016.1--36H-COG2/1-551 -MNL-ANWRIGYRLGGGFAVLILMLFVVSIFSLSKLSGFPQDARGIVKDVYPTVDANL  
Pe.car.1139-PC1\_0111-YP\_003015709.1--36H-COG2/1-556 ---M-KNYKIGTRLAGGFGLLIALSLAMLTSGIYQLNQSSTQMMQEPPLRKRERLASDW  
Pe.atr.485-ECA0182-YP\_048309.1--36H-COG2/1-542 MNLI-KNSSLGKMLGTGFTLVIAIGFLVAIFGRIQLDKLGENIQVLSQVRIANLLMMQEF  
Pectob.2320-W5S\_3753-YP\_006284688.1--36H-COG2/1-551 -MNL-ANWRIGYRLGGGFAVLILMLFVVSIFSLSKLSGFPQDARGIVKDVYPTVDANL  
Pa.ana.1905-PAJ\_2666-YP\_005933542.1--36H-COG2/1-514 ---M-KNYKIGTRLAGGFGLLIALSLAMLTSGIYQLNQSSTQMMQEPPLRKRERLASDW  
Ci.rod.62-ROD\_16161-YP\_003365194.1--36H-COG6/1-557 LGFL-HHIRLVPLFSSILGGIILLFALSAGLAGYFLLQADRDQVDTDEIQVRMGLSNSS  
En.asb.1498-Entas\_2095-YP\_004828614.1--36H-COG6/1-563 LSFL-HHIRLVPLFSSILGGIILLFALSAGLAGYFLLQADRDQVDTDEIQVRMGLSNSS  
En.638.865-Ent638\_1961-YP\_001176688.1--36H-COG6/1-563 LSFL-HHIRLVPLFSSILGGIILLFALSAGLAGYFLLQADRDQVDTDEIQVRMGLSNSS  
Cr.sak.579-ESA\_01710-YP\_001437800.1--36H-COG6/1-565 LSFW-HHIRLVPLFSSILGGIILLFALSAGLAGYFLLQADRDQVDTDEIQVRMGLSNSS  
Cr.tur.6-CTU\_22440-YP\_003210607.1--36H-COG6/1-565 LSFW-HHIRLVPLFSSILGGIILLFALSAGLAGYFLLQADRDQVDTDEIQVRMGLSNSS  
Ci.kos.578-CRO\_01456-YP\_001453025.1--36H-COG6/1-562 LGFL-HHIRLVPLFSSILGGIILLFALSAGLAGYFLLQADRDQVDTDEIQVRMGLSNSS  
Rahnel.1320-Rahaq\_1930-YP\_004212674.1--36H-COG6/1-566 TSFI-SNIRLVTLISLILTLGILFLFAVSIIGTSGFFLQKQNSAALANATQELQIRLALSNS  
Pantoe.297-Pat9b\_2403-YP\_004116261.1--36H-COG6/1-564 LSFI-SNIRLVTLISLILTLGILFLFAVSIIGTSGFFLQKQNSAALANATQELQIRLALSNS  
Er.bill.197-Ebc\_26700-YP\_003742048.1--36H-COG6/1-567 ISFI-SNIRLVTLISLILTLGILFLFAVSIIGTSGFFLQKQNSAALANATQELQIRLALSNS  
Pectob.2320-W5S\_1760-YP\_006282723.1--36H-COG6/1-570 AGVL-SNIRLVPLFSSILGGIILLFALSAGLAGYFLLQADRDQVDTDEIQVRMGLSNSS  
Pa.ana.1905-PAJ\_1621-YP\_005934497.1--36H-COG6/1-568 LSLW-QNIRLVPLFSSILGGIILLFALSAGLAGYFLLQADRDQVDTDEIQVRMGLSNSS  
En.clo.1544-EcWSU1\_02120-YP\_004951978.1--36H-COG6/1-576 LSFL-HHIRLVPLFSSILGGIILLFALSAGLAGYFLLQADRDQVDTDEIQVRMGLSNSS  
Ra.aqu.1678-Q7S\_09815-YP\_005401764.1--36H-COG6/1-566 TSFI-SNIRLVTLISLILTLGILFLFAVSIIGTSGFFLQKQNSAALANATQELQIRLALSNS  
Ye.pse.585-YPTB2412-YP\_070925.1--36H-COG6/1-579 VSFI-SNIRLVTLISLILTLGILFLFAVSIIGTSGFFLQKQNSAALANATQELQIRLALSNS  
Ye.ent.378-YE2588-YP\_001006789.1--36H-COG6/1-579 VFFV-NMRLVTLFIIILGILLLFAAAIGTSGYFLKQNSQSLAQAQTEIDIRGLSNSS  
Di.dad.235-Dda3937\_02787-YP\_003883649.1--36H-COG6/1-572 TGIL-GNLGLVPLFVILGGIILLFALSAGLAGYFLLQADRDQVDTDEIQVRMGLSNSS  
Pa.vag.184-Pvag\_1800-YP\_003931435.1--36H-COG6/1-568 AGI-W-QNIRLVPLFSSILGGIILLFALSAGLAGYFLLQADRDQVDTDEIQVRMGLSNSS  
En.bac.2261-D782\_2307-YP\_007340470.1--36H-COG6/1-558 LSFL-HHIRLVPLFSSILGGIILLFALSAGLAGYFLLQADRDQVDTDEIQVRMGLSNSS  
Pe.atr.485-ECA1683-YP\_049784.1--36H-COG6/1-573 VGML-SNIRLVPLFIIILGGIILLFALSAGLAGYFLLQADRDQVDTDEIQVRMGLSNSS  
Pe.car.1139-PC1\_2617-YP\_003018183.1--36H-COG6/1-573 AGML-SNIRLVPLFVILGGIILLFALSAGLAGYFLLQADRDQVDTDEIQVRMGLSNSS  
Di.zea.1140-Dd1591\_1535-YP\_003003868.1--36H-COG6/1-574 TGIL-GNLGLVPLFVILGGIILLFALSAGLAGYFLLQADRDQVDTDEIQVRMGLSNSS  
Di.zea.1140-Dd1591\_3580-YP\_003005868.1--36H-COG6/1-572 VSWS-HHWRLMPMFSSIIGVILILFALAIIGFSVHFLMRNSNSLNDVTAETQVRLGVSNS  
Es.col.1836-Y75\_p1397-YP\_489687.1--36H-COG6/1-546 LGFL-HHIRLVPLFACILGGIILLFALSAGLAGYFLLQADRDQVDTDEIIRGLANS  
Pe.atr.485-ECA3902-YP\_051990.1--36H-COG6/1-575 LSYI-NNIRLVSLFITLFSIILILFALSIGTASYFLKQNSDLKANELSDIRAGISSSL  
Sa.bon.1474-SBG\_1454-YP\_004730321.1--36H-COG6/1-537 RGFL-HHIRLVPLFSSILGGIILLFALSAGLAGYFLLQADRDQVDTDEIQVRMGLSNSS  
Sa.ent.407-STM1626-NP\_460585.1--36H-COG6/1-541 LGFL-HHIRLVPLFSSILGGIILLFALSAGLAGYFLLQADRDQVDTDEIQVRMGLSNSS  
Pe.car.1139-PC1\_3679-YP\_003019230.1--36H-COG6/1-567 LSYI-NNIRLVSLFITLFSIILILFALSIGTASYFLKQNSDLKANELSDIRAGISSSL  
Pectob.2320-W5S\_4020-YP\_006284955.1--36H-COG6/1-575 LSYI-NNIRLVSLFITLFSIILILFALSIGTASYFLKQNSDLKANELSDIRAGISSSL  
Di.zea.1140-Dd1591\_0523-YP\_003002884.1--36H-COG6/1-568 ISSI-HNIRLVTLFITLTIILALFALSIGTASYFLKQNSDLKANELSDIRAGISSNS  
Di.dad.235-Dda3937\_02665-YP\_003881279.1--36H-COG6/1-572 VFSW-HHWRLMPMFSSIIGVILILFALAIIGFSVHFLMRNSNSLNDVTAETQVRLGVSNS



En.clo.1544-ECWSU1\_01962-YP\_004951821.1--36H-COG1/1-553  
En.asb.1498-Entas\_1879-YP\_004828403.1--36H-COG1/1-554  
En.bac.2261-D782\_1748-YP\_007339929.1--36H-COG1/1-547  
Es.col.1836-y75\_p1862-YP\_490148.1--36H-COG1/1-553  
Cr.tur.6-CTU\_33010-YP\_003211664.1--36H-COG1/1-555  
Cr.tur.6-CTU\_25780-YP\_003210941.1--36H-COG1/1-536  
En.clo.1544-ECWSU1\_00403-YP\_004950264.1--36H-COG1/1-549  
En.638.865-Ent638\_2457-YP\_001177177.1--36H-COG1/1-555  
Sa.bon.1474-SBG\_1755-YP\_004730609.1--36H-COG1/1-553  
Pr.mir.1265-PMI1665-YP\_002151396.1--36H-COG1/1-548  
Cr.sak.579-ESA\_01348-YP\_001437444.1--36H-COG1/1-556  
Cr.sak.579-ESA\_00560-YP\_001436686.1--36H-COG1/1-555  
Sa.ent.407-STM1919-NP\_460876.1--36H-COG1/1-553  
Ci.kos.578-CKO\_01066-YP\_001452645.1--36H-COG1/1-552  
En.asb.1498-Entas\_0424-YP\_004826963.1--36H-COG1/1-549  
Pantoe.297-Pat9b\_1273-YP\_004115150.1--36H-COG1/1-553  
Ed.tar.1771-ETAF\_2264-YP\_005699859.1--36H-COG1/1-555  
Pa.ana.1905-PAJ\_3534-YP\_005936409.1--36H-COG1/1-553  
Pa.vag.184-Pvag\_1203-YP\_003930842.1--36H-COG1/1-552  
Pantoe.297-Pat9b\_1605-YP\_004115478.1--36H-COG1/1-556  
Cr.sak.579-ESA\_00210-YP\_001436348.1--36H-COG1/1-557  
Er.tas.1011-ETA\_pET460340-YP\_001905943.1--36H-COG1/1-543  
Cr.tur.6-CTU\_36610-YP\_003212024.1--36H-COG1/1-557  
Pe.car.1139-PC1\_1159-YP\_003016743.1--36H-COG1/1-556  
Er.tas.1011-ETA\_14640-YP\_001907403.1--36H-COG1/1-554  
Pa.vag.184-Pvag\_1725-YP\_003931362.1--36H-COG1/1-556  
Ed.ict.1187-NT01EI\_3742-YP\_002935104.1--36H-COG1/1-525  
En.638.865-Ent638\_0380-YP\_001175119.1--36H-COG1/1-549  
Er.bil.197-Ebc\_25360-YP\_003741914.1--36H-COG1/1-556  
Er.tas.1011-ETA\_16910-YP\_001907630.1--36H-COG1/1-543  
Es.fer.1173-EFER\_3055-YP\_002384154.1--36H-COG1/1-603  
Xe.nem.162-XNC1\_1619-YP\_003711880.1--36H-COG1/1-520  
En.clo.1544-ECWSU1\_02811-YP\_004952664.1--36H-COG1/1-559  
Di.dad.235-Dda3937\_03500-YP\_003882750.1--36H-COG1/1-553  
Xe.bov.105-XBJ1\_1924-YP\_003467828.1--36H-COG1/1-523  
Rahnel.1320-Rahaq\_1831-YP\_004212576.1--36H-COG1/1-556  
Ra.aqu.1678-Q7S\_08965-YP\_005401598.1--36H-COG1/1-556  
Cr.sak.579-ESA\_01126-YP\_001437230.1--36H-COG1/1-514  
Pe.atr.485-ECA2712-YP\_050803.1--36H-COG1/1-560  
En.clo.1544-ECWSU1\_00560-YP\_004950421.1--36H-COG1/1-597  
Di.dad.235-Dda3937\_03498-YP\_003882752.1--36H-COG1/1-561  
Cr.tur.6-CTU\_27880-YP\_003211151.1--36H-COG1/1-514  
Pe.car.1139-PC1\_1669-YP\_003017246.1--36H-COG1/1-560  
Ra.aqu.1678-Q7S\_14450-YP\_00502672.1--36H-COG1/1-551  
Ci.kos.578-CKO\_03622-YP\_001455137.1--36H-COG1/1-517  
Di.zea.1140-Dd1591\_2408-YP\_003004728.1--36H-COG1/1-557  
Di.zea.1140-Dd1591\_2406-YP\_003004726.1--36H-COG1/1-559  
Ed.ict.1187-NT01EI\_2801-YP\_002934203.1--36H-COG1/1-554  
Pe.car.1139-PC1\_1384-YP\_003016966.1--36H-COG1/1-559  
Rahnel.1320-Rahaq\_2866-YP\_004213595.1--36H-COG1/1-551  
Pe.atr.485-ECA1281-YP\_049387.1--36H-COG1/1-556  
Pectob.2320-W5S\_1886-YP\_006282848.1--36H-COG1/1-549  
Pectob.2320-W5S\_1696-YP\_006282659.1--36H-COG1/1-559  
Di.zea.1140-Dd1591\_2407-YP\_003004727.1--36H-COG1/1-555  
Pe.atr.485-ECA1509-YP\_049611.1--36H-COG1/1-559  
Pa.vag.184-Pvag\_1724-YP\_003931361.1--36H-COG1/1-520  
Pa.ana.1905-PAJ\_1541-YP\_005934417.1--36H-COG1/1-520  
Mo.mor.2189-MU9\_1596-YP\_007505015.1--36H-COG1/1-519  
Pr.mir.1265-PMI2808-YP\_002152509.1--36H-COG1/1-563  
Di.zea.1140-Dd1591\_0395-YP\_003002764.1--36H-COG1/1-556  
En.clo.1544-ECWSU1\_03786-YP\_004953635.1--36H-COG1/1-515  
Pectob.2320-W5S\_3170-YP\_006284116.1--36H-COG1/1-556  
Di.dad.235-Dda3937\_02184-YP\_003884754.1--36H-COG1/1-556  
Ci.rod.62-ROD\_32641-YP\_003366748.1--36H-COG1/1-517  
Di.dad.235-Dda3937\_03499-YP\_003882751.1--36H-COG1/1-561  
Di.dad.235-Dda3937\_00105-YP\_003883346.1--36H-COG1/1-561  
Pantoe.297-Pat9b\_1604-YP\_004115477.1--36H-COG1/1-555  
Er.tas.1011-ETA\_14660-YP\_001907405.1--36H-COG1/1-560  
Pr.mir.1265-PMI2809-YP\_002152510.1--36H-COG1/1-575  
Ed.tar.1771-ETAF\_3053-YP\_005700648.1--36H-COG1/1-516  
Se.pro.864-Spro\_1415-YP\_001477647.1--36H-COG1/1-546  
Di.zea.1140-Dd1591\_1804-YP\_003004134.1--36H-COG1/1-562  
Di.dad.235-Dda3937\_03501-YP\_003882749.1--36H-COG1/1-575  
Pantoe.297-Pat9b\_0851-YP\_004114731.1--36H-COG2/1-524  
Pa.vag.184-Pvag\_0291-YP\_003929953.1--36H-COG2/1-525  
En.clo.1544-ECWSU1\_03886-YP\_004953735.1--36H-COG2/1-519  
Cr.tur.6-CTU\_04790-YP\_003208842.1--36H-COG2/1-515  
Ci.kos.578-CKO\_04484-YP\_001455975.1--36H-COG2/1-521  
Cr.sak.579-ESA\_03488-YP\_001439539.1--36H-COG2/1-515  
Ci.rod.62-ROD\_48071-YP\_003368199.1--36H-COG2/1-521  
Sa.bon.1474-SBG\_2851-YP\_004731664.1--36H-COG2/1-521  
Sa.ent.407-STM3216-NP\_462130.1--36H-COG2/1-521  
En.asb.1498-Entas\_3753-YP\_004830248.1--36H-COG2/1-519  
Mo.mor.2189-MU9\_3389-YP\_007506806.1--36H-COG2/1-521  
Sa.ent.404-STY3394-NP\_457606.1--36H-COG2/1-522  
En.638.865-Ent638\_3526-YP\_001178235.1--36H-COG2/1-519  
Pe.atr.485-ECA1774-YP\_049874.1--36H-COG2/1-554  
En.638.865-Ent638\_2119-YP\_001176845.1--36H-COG2/1-549

NLTIKTRVTVTRVAIRYLKQNR--DPASLAAIN---KLLGTAADSLAKAEAYNKWOK--  
NLTIVKTRVTVTRVAIRYLKQNR--DPASLAAIN---KLLGTASTSLGNAETYSAWQK--  
DMLMQTRINLRSRARSMMMDTS--NLQSSAK-T---DLLKNAKSTLAQAQVHITRFNQ--  
DMLMQTRINLRSRARSMMMDSS--NQQSNAK-V---ELLDSARKTLAQAATHYKFKFS--  
QTLVKTRVTVTRVAIRYLKQNR--DPASLAID---KLLATASSTLAKAEKHPALYK--  
NLLLQTRINLRSRARSMMMDAS--NQQSSAK-T---DLNLTAKVLAEDTHFSAPKYG--  
ISLNQARVTVLNRGMLRLQSSMA--SQINGGQLN---ELVNTAKNLLADAQSHYDKYA--  
DMLMQTRINLRSRARSMMMDPN--NQQSSAK-T---DLLKNARGTLADSAKHVDAFKQ--  
DMLMQTRINLRSRARSMMMDAA--NQQSSAK-T---DLLQNAKTLTQAQAATHYFNKFN--  
VSLVQARNAINRVAIGMKTEQ-----STYIQ-----SIESIALSRLETANTHFONFLTDI  
NLLLQTRINLRSRARSMMMDAN--NQQSSAK-T---DLNLTAKVLAEDTHFNAPKA--  
QTLVKTRVTVTRVAIRYLKQNR--DPASLAAIN---KLLATASSTLGAEKHFALYK--  
DMLMQTRINLRSRARSMMMDAS--NQQSSAK-T---DLLQNAKTLTQAQAATHYFNKFN--  
DMLMQTRINLRSRARSMMMDAS--NQQSSAK-T---DLLKNAKSTLEQAATHYFNKFN--  
ISLNQARVTVLNRGMLRLQSSVA--TQINGGQLN---ELVNTAKNLLADAQSHYDKYA--  
QTLVKTRVTVTRVAIRYLKQNR--DEASLAID---KLLTAAGASLNEAQQHFAQYKS--  
ASITQIREETMKDALALSASHS-----DEGNAR---VSLGNLLQKLSNVDKEMENFYS--  
QTLVKTRVTVTRVAIRYLKQNR--DPASLASHIA---ELVNTAKQSLADKADEYFQAYKT--  
KTLIKTRVTVTRVAIRYLKQNR--DPKSLAAMA---ALLEQAGQSAEKADADPFKAWQA--  
IELNQTRVTVLNRGMLRLQSSMA--AQTNNGQLA---ALIAQTEKQLKADYFQRYN--  
ISLNQARVTVLNRGMLRLQGNMA--NQINGGQLS---QLVDTANKLLAEASHYDKYGG--  
DQYFRVTVTRVTRARATDSRKP-----QDMDAKQSLNMTLALAEFKA--  
ISLNQARVTVLNRGMLRLQGNMA--SQINGGQLN---ELVNTASQQLADAKSHYDKYFK--  
IMMNQTRIAIGSIIQNMMGNMNA---DKEAMQ---ALLQQAQTLQAASESSYKHYLS--  
ITLNQTRVTVLNRGMLRLQSEAA--NAGTSASLT---VLSNRAKQLLNEAQAFAHAYKA--  
MSLNQSRVTVLNRGMLRLQIATSKL---EGKTADIA---GLPESKQVQAADGYYKEFKA--  
QTLVKTRVTVTRVAIRYLKQNR--AGVAQLEIG---LNLNANAASLSDAEGYFKNRYA--  
ISLNQARVTVLNRGMLRLQSSAA--SQINGGQLS---ELVNTAKNLLADAQSHYDKYA--  
IALNQTRVTVLNRGMLRLQSETA--NSINSASLT---AISDQKGLLADADKSYARYQA--  
DQYFRVTVTRVTRARATDSKPK-----QDMDAKQSLNMTLALAEFKA--  
VALLQTRNTLNRAIRYMDQNS--NIGSGATVT---ELMLQASISLQKAEKNLWAEYEA--  
AALLQTRNTLNRAIRYMDQNS--PQTQID---SMALLKSLNNAEERSFARIS--  
DMLMQTRINLRSRARSMMMDPN--NQQSSAK-T---ELKNARATLDAKADHYDAFKK--  
DQYFRVTVTRVTRARATDSKPK-----DADNAQ---KTLSSAASALKNSEALAQPKFS--  
AAMLQTRNTLNRAIRYMDQNS--SQDQID---AMALIKSLNNAEERSFARIS--  
SYLLQTRNTLNRAIRYMDQNS--PQENIT---QLMSDAKASLKAEDDAYAFLA--  
SYLLQTRNTLNRAIRYMDQNS--PQENIT---QLMSDAKASLKAEDDAYAFLA--  
DQYFRVTVTRVTRARATDSKPK-----GTPDA---KLSESAQALDNMSRQLDAFKQ--  
DQYFRVTVTRVTRARATDSKPK-----ETAFAE---KFTSATTAFKNTSDQLAFAK--  
VALLQTRNTLNRAIRYMDQNS--NIGSGATVN---DLMQIAAASLQKAEKNLWAEYEA--  
DQYFRVTVTRVTRARATDSKPK-----DTENAK---KTLSDALIAINNTKGALEKPKA--  
DQYFRVTVTRVTRARATDSKPK-----GTPDA---KLSESAQALDNMSRQLDAFKQ--  
DQYFRVTVTRVTRARATDSKPK-----ETAFAE---KFTSATTAFKNTSDQLAFAK--  
AQYFRVTVTRVTRARATDSKPK-----NNGIYD---IEKATLIELESLLKGLDQPKFN--  
DQYFRVTVTRVTRARATDSKPK-----NEINGGQLN---ELVNTANALLADAQSHYDKYA--  
ISLNQARVTVLNRGMLRLQSSMA--NNEINGGQLN---ELVNTANALLADAQSHYDKYA--  
DQYFRVTVTRVTRARATDSKPK-----DTENAK---KTLSDALIAINNTKGALEKPKA--  
ASITQIREETMKDALALSIAHN---EEGNH---VSLGNLLQKLSNVDKEMENFYS--  
DQYFRVTVTRVTRARATDSKPK-----EPENAK---QTLSDALIAINNTKGALEKPKA--  
AQYFRVTVTRVTRARATDSKPK-----NNGIYD---IEKATLIELESLLKGLDQPKFN--  
IMMNQTRIAIGSIIQNMMGNMNA---DKEAMQ---ALLQQAQSLVAESSEYKHYLS--  
DQYFRVTVTRVTRARATDSKPK-----ETADAE---KFTSATTALKNTSDQLAFAK--  
DQYFRVTVTRVTRARATDSKPK-----EPDNK---QTLSDALIAINNTKGALEKPKA--  
DQYFRVTVTRVTRARATDSKPK-----NKEDAQ---KTLSDALIAINNTKGALEKPKA--  
DQYFRVTVTRVTRARATDSKPK-----EPENAK---QTLSDALIAINNTKGALEKPKA--  
IALNNSRTVTVLNRGMLRLQSSMA--SQMNGGQLD---DLMNKANAQLVEADRFHKIYD--  
MALNNSRTVTVLNRGMLRLQSSMA--SQMNGGQLD---DLMNKANAQLVEADRFHKIYD--  
DQYFRVTVTRVTRARATDSKPK-----EEDP---LKPSEAEAMENGLHDAEMKR--  
AALNTLRDIIAQAQSIYINAPQ---VEDANIT---TFMQTMDARKEAVDTLMEYVE--  
DRYKVKLTMDEALAAED-----NSSRER---ALLNEAAGDVEFLKGLLAQPKV--  
DQYFRVTVTRVTRARATDSKPK-----GT---PDLAQAQALDNMNGKLAEMKA--  
IMMNQTRIAIGSIIQNMMGNMNA---DKEAMQ---ALLQQAQSLVAESSEYKHYLS--  
DRYKVKLTMDEALAAED-----NSDRVL---ALLNDAADVDVFLKGLLAQPKV--  
ISLNQARVTVLNRGMLRLQGNMA--QINGGQLN---ELVNTAKNLLADAQSHYDKYA--  
DQYFRVTVTRVTRARATDSKPK-----DTDNAQ---KTLSDALIAINNTKGALEKPKA--  
IALIQTRNTLNRAIRYMDQNS--NIPSAGKSA---DLIDVANQSLTEADKHPAAYSQ--  
MSLNQSRVTVLNRGMLRLQSSMA--SGETADLT---SLYQSKGQDKAANDQYLFKN--  
IALVQTRNTLNRAIRYMDQNS--GGGTGSSVD---ELVALAKTQLTAEQQAAYRQ--  
AALNKLRDMLNVMFADHLTPD---LAESKIT---DFLSSYPQRKKEVSIITQYFT--  
QTLVKTRVTVTRVAIRYLKQNR--AGVAQAEIG---PLLDAANASLDSAEGYFKNRYA--  
ASVTELEBEVLDKDALMLTTPQ-----QSNDTK---KSLGELRQRLAEVDKLEKPYR--  
IALIQTRNTLNRAIRYMDQNS--NIPSAGKSA---DLIDVANQSLTEADKHPAAYSQ--  
DQYFRVTVTRVTRARATDSKPK-----EMDNAQ---KTLISATDALNKTEALQPKH--  
RDGVNDQIKYLRGIVDIT-----HRPENNV---KRPQQLAEATDRNTSAMKKEIAE--  
RDGVNDQIKYLRGIVDIT-----NRPEMNV---KRYGQLEATQRTNIAAMKKEID--  
IDNFQEFVSTQQLMLLDE-----QGYTA---QSQEQLKASISQGITVILGELNT--  
IDNFQEFVSTQQLMLLDE-----NQRWTO---QSQEQLKASISQGITVILGELNT--  
IDNFQEFVSTQQLMLLDE-----EGRWSQ---ESQKQLDAISQRTIVLLDELSA--  
IDNFQEFVSTQQLMLLDE-----NQRWTO---QSQEQLKASISQGITVILGELNT--  
IDNFQEFVSTQQLMLLDE-----QGRWTE---ESQKQLDAISQGITVILGELNT--  
IDNFQEFVSTQQLMLLDE-----EGRWSQ---SSQKELDEISQRTIVLLDELSA--  
IDNFQEFVSTQQLMLLDE-----EGRWSQ---SSQKELDEISQRTIVLLDELSA--  
IDNFQEFVSTQQLMLLDE-----QGYTA---QSQKELDEISEHITVILGELNT--  
IDNFQEFVSTQQLMLLDE-----KNPQIR---QLAAGASETSKIKITLILDEFNE--  
IDNFQEFVSTQQLMLLDE-----EGRWSQ---SSQKELDEISQRTIVLLDELSA--  
IDNFQEFVSTQQLMLLDE-----QGRYTE---QSQKELDEISEHITVILGELNT--  
IDNFQEFVSTQQLMLLDE-----SESEIN---KQALNKNERSGKISELMEYLNK--  
INLDRNGSNNTIAMATQ-----DPKLR---QILNNTKNDTATSEVQSTLKP--



Pectob.2320-W5S 2813-YP 006283770.1--36H-COG2/1-554  
Di.zea.1140-Dd1591\_0695-YP 003003055.1--36H-COG2/1-561  
Pa.vag.184-Pvag\_pPag30079-YP 003729820.1--36H-COG2/1-546  
Er.bill.197-Ebc 38940-YP 003743272.1--36H-COG2/1-526  
Ra.aqu.1678-Q7S 24891-YP 005419232.1--36H-COG2/1-554  
En.asb.1498-Entas 2287-YP 004828805.1--36H-COG2/1-513  
Rahnel.1320-Rahaq 4869-YP 004215574.1--36H-COG2/1-554  
Di.dad.235-Dda3937\_00027-YP 003883574.1--36H-COG2/1-554  
Pr.stu.1965-S70 05790-YP 006215722.1--36H-COG2/1-520  
En.638.865-Ent638 2100-YP 001176826.1--36H-COG2/1-512  
Pe.car.1139-PC1 2526-YP 003018093.1--36H-COG2/1-554  
Mo.mor.2189-MU9 702-YP 007504121.1--36H-COG2/1-525  
Pe.car.1139-PC1 3443-YP 003018995.1--36H-COG2/1-511  
Pa.ana.1905-PAJ 0915-YP 005933791.1--36H-COG2/1-559  
Pectob.2320-W5S 3736-YP 006284671.1--36H-COG2/1-510  
Pe.atr.485-ECA0183-YP 048310.1--36H-COG2/1-553  
Rahnel.1320-Rahaq 3107-YP 004213828.1--36H-COG2/1-503  
Pe.car.1139-PC1 4071-YP 003019622.1--36H-COG2/1-553  
Di.dad.235-Dda3937\_03462-YP 003884507.1--36H-COG2/1-563  
Ra.aqu.1678-Q7S 15665-YP 005402913.1--36H-COG2/1-503  
Pectob.2320-W5S 4505-YP 006285423.1--36H-COG2/1-555  
Pe.atr.485-ECA3642-YP 051730.1--36H-COG2/1-551  
Pe.car.1139-PC1 1417-YP 003016999.1--36H-COG2/1-554  
En.asb.1498-Entas 4509-YP 004821569.1--36H-COG2/1-559  
Pa.ana.1905-PAJ 3064-YP 005935940.1--36H-COG2/1-544  
Pectob.2320-W5S 1733-YP 006282696.1--36H-COG2/1-535  
Pe.atr.485-ECA4334-YP 052421.1--36H-COG2/1-556  
Di.zea.1140-d1591 1602-YP 003003935.1--36H-COG2/1-554  
Pectob.2320-W5S 4506-YP 006285424.1--36H-COG2/1-540  
Di.zea.1140-d1591 1453-YP 003003794.1--36H-COG2/1-532  
Pectob.2320-W5S 0106-YP 006281117.1--36H-COG2/1-556  
Di.zea.1140-d1591 0769-YP 003003127.1--36H-COG2/1-505  
Ra.aqu.1678-Q7S 18035-YP 005403387.1--36H-COG2/1-535  
Rahnel.1320-Rahaq 3579-YP 004214298.1--36H-COG2/1-535  
Pe.car.1139-PC1 4072-YP 003019623.1--36H-COG2/1-540  
Pe.car.1139-PC1 3464-YP 003019016.1--36H-COG2/1-551  
Pe.car.1139-PC1 0111-YP 003015709.1--36H-COG2/1-556  
Pe.atr.485-ECA0182-YP 048309.1--36H-COG2/1-542  
Pectob.2320-W5S 3753-YP 006284688.1--36H-COG2/1-551  
Pa.ana.1905-PAJ 2666-YP 005935542.1--36H-COG2/1-514  
Ci.rod.62-ROD 16161-YP 003365194.1--36H-COG6/1-557  
En.asb.1498-Entas 2095-YP 004828614.1--36H-COG6/1-563  
En.638.865-Ent638 1961-YP 001176688.1--36H-COG6/1-563  
Cr.sak.579-ESA 01710-YP 001437800.1--36H-COG6/1-565  
Cr.tur.6-CTU 22440-YP 003210607.1--36H-COG6/1-565  
Ci.kos.578-CRO 01456-YP 001453025.1--36H-COG6/1-562  
Rahnel.1320-Rahaq 1930-YP 004212674.1--36H-COG6/1-566  
Pantoe.297-Pat9b 2403-YP 004116261.1--36H-COG6/1-564  
Er.bill.197-Ebc 26700-YP 003742048.1--36H-COG6/1-567  
Pectob.2320-W5S 1760-YP 006282723.1--36H-COG6/1-570  
Pa.ana.1905-PAJ 1621-YP 005934497.1--36H-COG6/1-568  
En.clo.1544-EcWSU1\_02120-YP 004951978.1--36H-COG6/1-576  
Ra.aqu.1678-Q7S 09815-YP 005401764.1--36H-COG6/1-566  
Ye.pse.585-YPTB2412-YP 070925.1--36H-COG6/1-579  
Ye.ent.378-YE2588-YP 001006789.1--36H-COG6/1-579  
Di.dad.235-Dda3937\_02787-YP 003883649.1--36H-COG6/1-572  
Pa.vag.184-Pvag 1800-YP 003931435.1--36H-COG6/1-568  
En.bac.2261-D782 2307-YP 007340470.1--36H-COG6/1-558  
Pe.atr.485-ECA1683-YP 049784.1--36H-COG6/1-573  
Pe.car.1139-PC1 2617-YP 003018183.1--36H-COG6/1-573  
Di.zea.1140-Dd1591 1535-YP 003003868.1--36H-COG6/1-574  
Di.zea.1140-Dd1591 3580-YP 003005868.1--36H-COG6/1-572  
Es.col.1836-Y75 p1397-YP 489687.1--36H-COG6/1-546  
Pe.atr.485-ECA3902-YP 051990.1--36H-COG6/1-575  
Sa.bon.1474-SBG 1454-YP 004730321.1--36H-COG6/1-537  
Sa.ent.407-STM1626-NP 460585.1--36H-COG6/1-541  
Pe.car.1139-PC1 3679-YP 003019230.1--36H-COG6/1-567  
Pectob.2320-W5S 4020-YP 006284955.1--36H-COG6/1-575  
Di.zea.1140-Dd1591\_0523-YP 003002884.1--36H-COG6/1-568  
Di.dad.235-Dda3937\_02665-YP 003881279.1--36H-COG6/1-572

IDELNGYLNNQQLLLLLL-----SESEIN---KQFALNKERSGKISELMEYLNQ--  
IEDVNEAVRISQQLMLVS-----GDDRK---AVSDQPPISKDIITRLMDALVKHA  
RYYSTDLSRLVRNVVLAD-----APDRKA---VFKKDYDRVHDKITATVDQVDA--  
RDGVNDQIKFLRGMVIDT-----TRPQYNV---KRFQQLTDTATDKTNLAVGKIAQ--  
RDGVNDQIKYLRGVIDT-----KNPEQNK---KRYLQLDDTVKKTNLAMDKIAA--  
IEVFOAK---INRLKLYNGDE-----KSQQLLAGVVKHAEELTAEAKK--  
RDGVNDQIKYLRGVIDT-----KNPEQNK---KRYLQLDDTVKKTNLAMDKIAA--  
IDELNALLGQQLLMLD-----SNADIK---RKNEEIKGYSAEITALLADLSK--  
MDNFYSYIGIQELILLDD-----RDSE---RRRNELEKISSNVVRLKELDE--  
IEVFOAK---INRLKLYNGDE-----KSQQLMAKVVKHAEEITAEAKT--  
IDELNGYLNNQQLLLLLL-----SESEIN---KQFALNKERSGKISELMEYLNQ--  
RHATEERAIMLRDMINATDKKD----KTEELN---RFKEEDGKVKSRQTLLDMVNE--  
DKTVVAREGNFGYALER-----KAQYLE---TNVARNEFRQIEGRLLDKLES--  
RYYTSDMSRLARNAILLK-----DVAKRE---KASDYGGERHEVDSALLSLIGK--  
DKTVVAREGNFGYALER-----KAQYLE---KINDAIGNISGEVLSLLEIDT--  
IDNVTSILVAYQRLMLVS-----DSVQIQ---TNVTRVNEFRQIEGRLLDKLER--  
-----KFTRLSYMASKDP-----KFVEENRQALDKLEARQADVEA--  
IDNVNSILVAYQRLMLVS-----DQTQIQ---TNVARNEFRQIEGRLLDKLES--  
IDNVNEGVRVQQLLLVS-----GDDRK---AVSDQPPISKDIITRLMDALEKHA  
-----KFTRLSYMASKDP-----KFVEENRQALDKLEARQADVEA--  
IDNVTSILVAYQRLMLVS-----GEEQIQ---TNVTRVNEFRQIEGRLLDKLES--  
HATLVAG---VQRSMVAARSN-----DSDLVE---LFAAENTRASKESGKRQEPAS--  
QDILNTNVRTLRDIIILLPAD-----NRQEQK---ALRAVIVKTTNSASEIYKNDLG--  
IDGVNKNSTLTYQVAAT-----DDNERK---LIISELDKQATLNHELMQQLKDD--  
SFYAKDMSRLARIAVLQP-----DPAKTE---KALNSYQQVRSQADSLMQLVLDK--  
QDILNTNVRTLRDIIILLPGD-----KVQEQK---ALKAIIVKTTNSAGEIYKTLDS--  
KDNINTNAIAVRNLTMQE-----DDRLVQ---EETRIEEMISRNALLSKIHD--  
IDELNDALLGQQLVLMMLD-----TNADIQ---QKNTKTNKSAVITNLLADLEA--  
IDNVNGHFVAYLQMLVS-----GQEQRQ---GYVDRIMAYRKEISRLLDNLES--  
EWLVRQNRVLIIMDMLLP-----NTLNQK---QSTDELNQNMHIGQVWAEYRA--  
KDNINANAIAVRNVLLE-----DERQMQ---EKKARIEELISRNALLKIIDD--  
DKTVVAREGNFGYALER-----KAQYLE---QHTDAINTISQELTALLQEQIRA--  
LSGVKDDSLNIYGLVLSV-----EAADIE---AGKRQVAAAEKTAALNRLQAIA--  
LSGVKDDSLNIYGLVLSV-----EAADIE---AGKRQVAAAEKTAALNRLQAIA--  
IDNVNGHFVAYLQMLVS-----GQEQRQ---GYVDRIMAYRKEISRLLDNLES--  
HATLVAG---VQRSMVAARSN-----DSDLVE---LFAAENTRASKESGKRQEPAS--  
YGLLRDMVAIVRNLALLT-----EADQMQKEQVIVTQKARYIENRERLAAMVA--  
HATLVAG---VQRSMVAARSN-----DSDLVE---LFAAENTRASKESGKRQEPAS--  
KDNINTNAIAVRNLTMQE-----DSRQMQ---QEKVRIEEMVSRNALLTKIHD--  
IDNVNGHFVAYLQMLVS-----GQEQRQ---GYVDRIMAYRKEISRLLDNLES--  
HATLVAG---VQRSMVAARSN-----DSDLVE---LFAAENTRASKESGKRQEPAS--  
YGLLRDMVAIVRNLALLT-----EADQMQKEQVIVTQKARYIENRERLAAMVA--  
NHLRTARINMIHAGAASRIA-----EMNDVK---ANLAAAEKRIKQSEGFNAYMA--  
NHLRTARINMIHAGAASRIA-----EMDAMK---QNIHEAETRIKQSQESFASYMN--  
NHLRTARINMIHAGAASRIA-----EMDAMK---QNTAAEAETRIKQSQTSFAMYNN--  
NQLRTARINMIHAGAASRIA-----EMDAMK---RNITADAEKAIQAANAGPKQYVD--  
NQLRTARINMIHAGAASRIA-----EMDAMK---RNITADAEKAIQAANVGFQYVD--  
NHLRTARINMIHAGAASRIA-----EMDDMK---ANLAAAEKRIKQSEGFNAYMA--  
NHLRTARLLLIQAAAAARIG-----DQDVFS---QNLKDAASRIKQSQTSFDMYIN--  
NHLRTARLNVIQSGAAARIG-----EMDSYR---ADLARTEQRIEQARAGFKLYMD--  
NHLRTARLNIIHAGASARIG-----EMDAFN---DNVQTEKRIQATSEFNAYLN--  
NHLRTARLLLIQAAAAARIG-----DSQVFN---DNLTAQQRLEQSKKAFVLYEQ--  
SHMSARLNIIQAGAAARIG-----EMDEFN---ANLAAATADRIKQAEAGLKIYLN--  
NHLRTARINMIHAGAASRIA-----EMDAMK---QNISEAEKRIKQSDGFNAYMN--  
NHLRTARLLLIQAAAAARIG-----DQDVFS---QNLKDAASRIKQSQTSFDMYIN--  
NHLRTARLLIIQAAASARIG-----DATGYQ---QGLKNAEGRIASQSQMPDLYYN--  
NHLRTARLLIIQAAASARIG-----DATGYQ---QGLKNAENRISQSQMPNLYYN--  
NHLRTARLLIIQAGAAVRVG-----DTEVFN---NLLKQAEQRIASSKDAFKVYEN--  
NHLRTARLTIIQAGAAARIG-----DMDEFN---ANVAAAEKRIQQAQDGFAVYQA--  
NHLRTARLLIIHAGAASRIA-----EMDEM---RNITAAEAETRIKQSQDGFNAYMS--  
NHLRTARLLLIQAAAAARIG-----DSQVFN---DNLKQAEQRLDQSKKAFVLYEE--  
NHLRTARLLLIQAAAAARIG-----DSQVFN---DNLKQAEQRLDQSKKAFVLYEE--  
NHLRTARLLIIQAGAAVRVG-----DTDFVN---NLLKQAEQRIASSKDAFKVYEN--  
NHLRTARLMLIQAATAAKEG-----DKDTAN---SSTQAEGRLEKQSADSFAAYQS--  
DFLRSARINMIQAGAAASRIA-----EMEAMK---RNITAAEAETRIKQSQDGFNAYMN--  
DQLRVARLLIIQAGAAARIS-----DHEVFK---AASDQAGRVRASQKRLDEYLA--  
NHLRTARINMIHAGAASRIA-----EMDEM---ANLAAAEKRIKQSQDGFNAYMS--  
NHLRTARINMIHAGAASRIA-----EMDEM---ANLAAAEKRIKQSQDGFNAYMS--  
DQLRVARLLIIQAGAAARIS-----DHEVFK---SASDQAGRVRASQKRLDEYLA--  
DQLRVARLLIIQAGAAARIS-----DHEVFK---AASDQAGRVRASQKRLDEYLA--  
DNFRVSRQLLIQAVASSRIG-----DTDSFK---SQAPEGAERIKSSQDFDYYMA--  
NHLRTARLMLIQAATAAKEG-----DKDTAS---SSTQAEGRLEKQSADSFAAYQS--

Pr.mir.1265-PMI1666-YP 002151397.1--36H-COG1/1-568  
Di.dad.235-Dda3937\_02779-YP 003883640.1--36H-COG1/1-566  
Di.zea.1140-Dd1591\_1542-YP 003003875.1--36H-COG1/1-566  
Pe.atr.485-ECA1691-YP 049792.1--36H-COG1/1-561  
Se.pro.864-Spro 2983-YP 001479212.1--36H-COG1/1-556  
Ph.asy.1114-PAU\_02685-YP 003041519.1--36H-COG1/1-564  
Pr.stu.1965-S70\_18135-YP 006218124.1--36H-COG1/1-561  
Mo.mor.2189-MU9\_1762-YP 007505181.1--36H-COG1/1-561  
Pe.car.1139-PC1\_2609-YP 003018175.1--36H-COG1/1-561  
Xe.nem.162-XNC1\_1620-YP 003711881.1--36H-COG1/1-567  
Pectob.2320-W5S\_1768-YP 006282731.1--36H-COG1/1-561  
Pa.vag.184-Pvag\_1723-YP 003931360.1--36H-COG1/1-558  
Ye.pes.133-YPZ3\_2024-YP 003568196.1--36H-COG1/1-557  
Ye.pse.585-YPTB2401-YP 070915.1--36H-COG1/1-557  
Ye.ent.378-YE2575-YP 001006778.1--36H-COG1/1-557  
Pa.ana.1905-PAJ\_1540-YP 005934416.1--36H-COG1/1-563  
Ph.lum.1262-plu1853-NP\_929126.1--36H-COG1/1-564  
Serrat.1901-SerAS13\_3075-YP 006025914.1--36H-COG1/1-555  
Sa.ent.404-STY2128-NP\_456485.1--36H-COG1/1-553  
Ra.aqu.1678-Q7S\_08960-YP 005401597.1--36H-COG1/1-564  
Se.mar.2260-D781\_2759-YP 007345195.1--36H-COG1/1-555  
Rahnel.1320-Rahaq\_1830-YP 004212575.1--36H-COG1/1-564  
Se.ply.1407-SerAS9\_3072-YP 004506452.1--36H-COG1/1-555  
Ed.ict.1187-NT01E1\_1461-YP 002932882.2--36H-COG1/1-555  
En.aer.1436-EAE\_15535-YP 004593297.1--36H-COG1/1-556  
Xe.bov.105-XBJ1\_1923-YP 003467827.1--36H-COG1/1-567  
Serrat.1408-SerAS12\_3073-YP 004501499.1--36H-COG1/1-555  
Er.bill.197-Ebc\_25350-YP 003741913.1--36H-COG1/1-559  
Er.tas.1011-ETA\_14650-YP 001907404.1--36H-COG1/1-554  
Sa.ent.407-STM4533-NP\_463392.1--36H-COG1/1-553  
Es.col.1836-Y75\_p4240-YP 00452486.1--36H-COG1/1-551  
En.bac.2261-D782\_3913-YP 003742002.1--36H-COG1/1-553  
Ci.kos.578-CKO\_03442-YP 001454958.1--36H-COG1/1-554  
Cr.sak.579-ESA\_03402-YP 001439456.1--36H-COG1/1-555  
Pantoe.297-Pat9b\_1606-YP 004115479.1--36H-COG1/1-558  
Cr.tur.6-CTU\_05670-YP 003208930.1--36H-COG1/1-555  
Sa.bon.1474-SBG\_3944-YP 004732724.1--36H-COG1/1-553  
En.asb.1498-Entas\_0547-YP 004827084.1--36H-COG1/1-554  
Ci.rod.62-ROD\_48461-YP 003368233.1--36H-COG1/1-554  
Ed.tar.1771-ETAF\_1249-YP 005698855.1--36H-COG1/1-529  
En.638.865-Ent638\_0513-YP 001175251.1--36H-COG1/1-586  
Ed.ict.1187-NT01E1\_1462-YP 002932883.1--36H-COG1/1-532  
Ye.ent.378-YE2573-YP 001006777.1--36H-COG1/1-545  
Ed.tar.1771-ETAF\_1250-YP 005698856.1--36H-COG1/1-530  
Mo.mor.2189-MU9\_1763-YP 007505182.1--36H-COG1/1-524  
En.aer.1436-EAE\_15540-YP 004593298.1--36H-COG1/1-536  
En.638.865-Ent638\_2456-YP 001177176.1--36H-COG1/1-533  
Se.pro.864-Spro 2982-YP 001479211.1--36H-COG1/1-541  
Es.col.1836-Y75\_p1861-YP 490147.1--36H-COG1/1-533  
Serrat.1901-SerAS13\_3074-YP 006025913.1--36H-COG1/1-541  
Ye.pes.133-YPZ3\_2023-YP 003568195.1--36H-COG1/1-536  
Serrat.1408-SerAS12\_3072-YP 004501498.1--36H-COG1/1-541  
Se.mar.2260-D781\_2758-YP 007345194.1--36H-COG1/1-534  
Ye.pse.585-YPTB2400-YP 070914.1--36H-COG1/1-536  
Se.ply.1407-SerAS9\_3071-YP 004506451.1--36H-COG1/1-541  
Pr.stu.1965-S70\_18140-YP 006218125.1--36H-COG1/1-521  
En.bac.2261-D782\_1749-YP 007339930.1--36H-COG1/1-533  
En.asb.1498-Entas\_2590-YP 004829104.1--36H-COG1/1-533  
En.asb.1498-Entas\_3672-YP 004830170.1--36H-COG1/1-545  
Ci.kos.578-CKO\_01067-YP 001452646.1--36H-COG1/1-537  
En.clo.1544-3cW5U1\_02810-YP 004952663.1--36H-COG1/1-538  
Sa.ent.407-STM3152-NP\_462067.1--36H-COG1/1-547  
Pe.atr.485-ECA1332-YP 049438.1--36H-COG1/1-555  
Pe.car.1139-PC1\_1208-YP 003016792.1--36H-COG1/1-555  
En.638.865-Ent638\_3407-YP 001178118.1--36H-COG1/1-545  
Pa.vag.184-Pvag\_1413-YP 003931052.1--36H-COG1/1-554  
Ph.asy.1114-PAU\_02684-YP 003041518.1--36H-COG1/1-544  
Pa.ana.1905-PAJ\_1316-YP 005934192.1--36H-COG1/1-556  
Ci.kos.578-CKO\_04394-YP 001455885.1--36H-COG1/1-561  
Sa.bon.1474-SBG\_2750-YP 004731563.1--36H-COG1/1-547  
Ra.aqu.1678-Q7S\_16025-YP 005402985.1--36H-COG1/1-554  
Rahnel.1320-Rahaq\_3177-YP 004213898.1--36H-COG1/1-554  
Pectob.2320-W5S\_3114-YP 006284066.1--36H-COG1/1-555  
Ye.ent.378-YE2971-YP 001007160.1--36H-COG1/1-552  
Er.bill.197-Ebc\_20190-YP 003741400.1--36H-COG1/1-556  
Ph.lum.1262-plu1854-NP\_929127.1--36H-COG1/1-544  
Er.bill.197-Ebc\_25340-YP 003741912.1--36H-COG1/1-528  
Di.zea.1140-Dd1591\_2937-YP 003005238.1--36H-COG1/1-564  
Er.tas.1011-ETA\_14670-YP 001907406.1--36H-COG1/1-518  
Sa.ent.404-STY4234-NP\_458344.1--36H-COG1/1-547  
Sa.ent.407-STM3577-NP\_462478.1--36H-COG1/1-547  
Sa.bon.1474-SBG\_3170-YP 004731982.1--36H-COG1/1-547  
En.asb.1498-Entas\_2591-YP 004829105.1--36H-COG1/1-555  
En.638.865-Ent638\_1858-YP 001176586.1--36H-COG1/1-552  
Ci.rod.62-Rod\_19331-YP 003365490.1--36H-COG1/1-553  
Di.dad.235-Dda3937\_01559-YP 003882087.1--36H-COG1/1-566  
Er.bill.197-Ebc\_37780-YP 003743156.1--36H-COG1/1-553  
Pantoe.297-Pat9b\_2001-YP 004115872.1--36H-COG1/1-558  
-HINAYQIHSE--EIRNRLKGRFIEYFS---ALNQLIILLQDKNLKDFFEQPT---TSYQ  
--IPYTNQDDP--AVAQVVDNYTVLNS---ALSDLVIFISNGKLEFFDQPT---QSFQ  
--IPYTDQDDP--AIAQVVDKNTALNS---ALSELIVFISTGKLEFFDQPT---QGFQ  
--MPQDARQDD--SISRGVKENYVALNA---ALTELIQFLNAGEFKFVEQPT---QRFO  
--IPLNARQDD--QSAEKLKQYGLLHG---ALTELVLLGEGKINAFDDQPT---QSYQ  
--TAKLP1HET--ESLNRLRKAYDVYIS---ALHDLVLVLEHRAVEFFNQPT---SKYQ  
--LMAETSHDK--TKFEQLFSTYETYRD---ALIQGLKYAQKQLDEFYAHRT---SGYQ  
--MMEGTSYDK--AKFEKLLSTYETYRN---ALTRLMYSVREDQLEQFYTYAT---SGYQ  
--VPQDARQDE--AVTRGVKENYVALNG---ALTELIQFLNAGEFKFVEQPT---QSFQ  
--LPKLS1HDP--ERLQTLKQTYRDLN---ALKELDILLTKKDFKAFVEQPT---TGFO  
--LPQDARQSE--SVTRDVKENYVALNG---ALTELIQFLNAGEFKFIDQPT---QRFO  
--NLSEQGKTA--ENNVALQANYKAYHD---ALAEMLVFFTTGNFKGFVDQPT---QSFQ  
--IPQNSQDDP--EGAKKLLKQSYEEYFS---ALTELINLMETNKINEFFNHPT---TSFO  
--IPQNSQDDP--EGAKKLLKQSYEEYFS---ALTELINLMETNKINEFFNHPT---TSFO  
--IPQNSQDDP--EGAKKLLKQSYEEYFS---ALTELIQLMEAKKINEFFDQPT---SSFO  
--NLSEKGSAA--ENVLTLQANYKQFHD---GLAELIVFLGNGNFKGFVDQPT---QSYQ  
--TAKLP1HES--ESLNRLKAYDVYIS---ALHELIVLLEHRAVEFFNQPT---GKYQ  
--IPLSPRQDA--QSAEKLKQYGLLHG---ALSELVQLLGGKINAFDDQPT---QSYQ  
--MTPDAPAM--EASANVDEKQYRQYA---ALAEILQFLDNGNDYAFDQPT---QGMQ  
--IPADASQNP--QFADAKKQYQVLDH---ALSELEIILGLGRINDFFEQPT---QQYQ  
--VPLGERQNR--QDAEKLKQYGLVLYG---ALSELIQLLSDGKINAFDDQPT---QSYQ  
--IPADASQNP--QFADAKKQYQVLDH---ALSELEIILGLGRINDFFEQPT---QQYQ  
--IPLSPRQDA--QSAEKLKQYGLLHG---ALSELVQLLGGKINAFDDQPT---QSYQ  
--LPDRPQSE--EAMEAMEQNYGTLHN---ALGELIQLLSAGHINEFFEQPT---QSYQ  
--IPQDPRQDP--QATEKLKQYGLLYG---ALSELIQLLGGKINAFDDQPT---QKYQ  
--LKP1HDP--DHLQRLKQTHHEYLN---ALKELDGLFARKQYKFFAQKT---TDYQ  
--IPLSPRQDA--QSAEKLKQYGLLHG---ALSELVQLLGGKINAFDDQPT---QSYQ  
--NLSEKGTSA--ENVKQLHANYKQLHD---ALADLVMMQTGKTFDIAQPT---QSYQ  
--HLSEAGKTS--ANVQAVQKQNYAILHD---ALSELIPLIGSGKITEFFGQPT---QRYQ  
--LPDRPQSE--AAFLIKRKYDIYHG---ALAEILQLLGGAGKINEFFDQPT---QSYQ  
--LPDRPQSE--AAAETKRNKYDIYHN---ALAEILQLLGGAGKINEFFDQPT---GGYQ  
--MPDRPQSE--SAALEIKRNYDIYHG---ALAEILQLLGGAGKINEFFDQPT---GGYQ  
--LPDRPQSE--TAAVEIKRNYDIYHN---ALAEILQLLGGAGKINEFFDQPT---GGYQ  
--LPDRPQSE--EYAOEIKRNYDIYHG---ALAEILQLLGGAGKINEFFDQPT---QKYQ  
--NLSEKGSAA--ENVLTLQANYNAYHG---ALQELIDFLNTGNFKGFVDQPT---QGFQ  
--LPDRPQSE--EYAOEIKRNYDIYHG---ALAEILQLLGGAGKINEFFDQPT---QKYQ  
--LPDRPQSE--AAFLIKRKYDIYHG---ALAEILQLLGGAGKINEFFDQPT---QSYQ  
--LPDRPQSD--AAAMEIKRNYDIYHG---ALAEILQLLGGAGKINEFFDQPT---QSYQ  
--LPHDRPQSE--AASAEIKRNYITFHN---ALTKNLINLVGAGKINAFDDQPT---QSYQ  
--LPDRPQSD--EAVQAMSQYDYLHS---ALGELIQLLTAGRINDFFEQPT---QSYQ  
--LPDRPQSD--AAAQEIKNYDIYHG---ALAEILQLLGGAGKINEFFDQPT---QSYQ  
--YSDNDEER--ALSQDTQHYRALRT---ALLQLIDLVEKGDILQGFMDHPT---QQIQ  
--VPSLDESDTGGELLDATKNSYQNLRS---SLRELIDFLLEAGNLQGFMDHPT---QRTQ  
--CSDSDEER--ALSQELALQHYQALRT---ALLQVLVLEKGGDLQGFMDHPT---QRTQ  
--QVLSKEDD---PAGIEEQYSYSLG---VVKELRGYIDNANIYPAYVEHPT---QMYQ  
--TPRADQEQ--QLADATRDYSYENLRG---ALRELIIVLENNRNLQAFMDQPT---QKIQ  
--QEAUSEKGG--ALTAEMQKGYTQWHS---DLEHQATWLENNQLSDFLTPAV---QDSQ  
--VPRNSBEQ--QLTATTKASYDRLRN---TLRELIIGLENDNLQAFMDQPT---QKIQ  
--MTAGNEHVR--GLQKETESFARWHN---DLEHQATWLENNQLSDFLTPAV---QGSQ  
--VPRHSEEQ--QLTETTQASYNLRS---ALRELIIGLENNNLQAFMDQPT---QKIQ  
--VPRHSEEQ--QLTETTQASYNLRS---ALRELIIGLENNNLQAFMDQPT---QKIQ  
--VPRHSEEQ--QLTETTQASYNLRS---ALRELIIGLENNNLQAFMDQPT---QKIQ  
--LVPAERSR--SLT---LRYQQLHA---ALLELSGFLASGNLQAFMDQPT---QQIQ  
--VPRHSEEQ--QLTETTQASYNLRS---ALRELIIGLENNNLQAFMDQPT---QKIQ  
--VPRHSEEQ--QLTETTQASYNLRS---ALRELIIGLENNNLQAFMDQPT---QKIQ  
--QPLLEHEN---LAVIDEKYQAFLA---ILKELRALIDKNDIPGYVALPA---QQHQ  
--IEQRSTESR--QLGERTEASFSAWRN---GLEHQATWLENNQLSDFLTPAV---QKMQ  
--QEAUSEKGG--ALKVMAMKKNFDQWHS---DLHDQATWLENNQLSDFLTPAV---QESQ  
--ISPGMMDA--QYSAQV1SSQALLD---QGVAPQMQLAQGGDLQAFMDQPT---PPLS  
--TEASTEKG--ALQAATEKSYTQWYS---DLEHQATWLENNQLSDFLTPAV---QASQ  
--QEAUSAEVK--ALKVMAMKKNFDQWHS---DLHDQATWLENNQLSDFLTPAV---QASQ  
--LSPGMMDA--DISREVLNSWQALLE---KGVVPQMQLAQGGDLQAFMDQPT---PPLS  
--IDHASLDD--ALVQAVSRDWSNLIV---QGVPEPLYQKAAANTLDDYQNAKDVVPPLS  
--IDHAGLDF--ALVQAVSRDWSNLIV---QGVPEPLYQKAAANTLDDYQNAKDVVPPLS  
--VSHGAMNE--AVFAEV1STWQALLE---QGIAPQMQLAQGGDLQAFMDQPT---PPLS  
--LAPGPMNP--DVVDGVIQSWQKLLD---EGVTPQLQARQASPDYARQQANNVTPPLS  
--LPKLNEDGSSVLLASVETSYKEYIK---ALRELSVFLERKGNVDAFDQPT---EKYQ  
--LSPGMMDA--AVANDVIDKWQKLLD---QGVTVQLQARQASLDSYRQQANNVTPALS  
--LSPGMMDA--EIAAAVLANWQALLD---KGVAPQMQLAQGGDLQAFMDQPT---PPLS  
--LSPGMMDA--DISMAVLNSWQALLD---KGVMPQMQLAQGGDLQAFMDQPT---PPLS  
--APHGLEED--SSVQELITSWENLIT---QGVTPFLDAAARSKNTESYNQLANSTVPALS  
--APHGLEED--SSVQELITSWENLIT---QGVTPFLDAAARSKNTESYNQLANSTVPALS  
--IDHAGLDN--ALVQAVSRDWSNLIV---QGVPEPLYQKAAANTLDDYQNAKDVVPPLS  
--IDHAGIDP--TLVNGVIDGWSGLID---QGVTPLYQAAAMNSAAYQDLAKRTVPALS  
--QSPGMMDA--GYSAAVIGSWQKLLD---NGVLPQMQLAQGGDLQAFMDQPT---PPLS  
--LPKLNEDGSSVLLASVETSYKEYIN---ALRELSVFLERKGNVDAFDQPT---EKYQ  
--IPETTPAGG--ALKKSMEAYDVYAH---ELSQLIAYLQNYQDLFDLSDPT---QKQO  
--IDHVGMSP--ELVEAVTRDWSNLIT---QGVPEPMFQRAVDKFKFDEYDYKAKDVVPPLS  
--IPAVTPEGG--VLKQATATAYGIYIN---ELAQLAEYLRNDQLQAFDLDSP---QKQO  
--SEAIAGKDP--ALDAQAEASFQMYD---VLQQS1HYLQKADNYAAYGNLDA---QKQO  
--SEAIAGKDP--ALDAQAEASFQMYD---VLQQS1HYLQKADNYAAYGNLDA---QKQO  
--SDA1AGKDP--ALDARAESFQMYD---VLQQS1HYLQKADNYAAYGNLDA---QKQO  
--IAQPAPM--E--QVSSNIDKYTYAFYA---GLTELIQFLSAGNMDYAFDQPT---QGMQ  
--MPVPMQSQ--ELTAEAMQKAYTQMH---VMRLS1EYLSADNYQAYGDLDA---QEAQ  
--IPHPMDA--E--EASKDVDEKRYTYTYT---ALAEIVQFLSAGNMDYAFDQPT---QSMQ  
--IDHAGMSP--ELVDAVIRDWSNLIT---QGVPEPMFQRAADKFKFDDYKFAKDVVPPALS  
--APQGSQNA--QLATTANNYQMYD---TKMKS1QYLGANNYAYGNLDA---QKQO  
--MAPGMDA--DTANNVITNWQKLLD---EGTAPQVSLAQGGTLEAYRAQANNVTPALS

En.clo.1544-ecwsu1\_01962-yp\_004951821.1--36H-COG1/1-553 --MPQVNGQNA--ALTEDEMOKSWSQMHE---VMRLSIAYLRADNYQAYGDLDA---CQAQ  
En.asb.1498-Entas\_1879-yp\_004828403.1--36H-COG1/1-554 --MPQVNSQNA--ALTEEMQKAWSQMHE---VMRLSIEYLRDNDYQAYGDLDA---CQAQ  
En.bac.2261-D782\_1748-yp\_007339929.1--36H-COG1/1-547 --AAVEPEM-A--QVSQRVAQQTQAYFA---ALQELIGFLEQGNMAYFAQPT---CGKQ  
Es.col.1836-y75\_p1862-yp\_490148.1--36H-COG1/1-553 --MAPLPEM-V--ATSRNIDEKYKNYYT---ALTELDYLDYNGTAYFAQPT---CGMQ  
Cr.tur.6-CTU\_33010-yp\_003211664.1--36H-COG1/1-555 --SPRLNGQDE--ATASQIAEYKQALHD---ILQASIGYLGANNYAYGNLDA---CQAQ  
Cr.tur.6-CTU\_25780-yp\_003210941.1--36H-COG1/1-536 --VKVDVPEIN--AVAGDVQSYRDYQ---ALSELVQVLETNNMAYFAQAT---CGKQ  
En.clo.1544-ecwsu1\_00403-yp\_004950264.1--36H-COG1/1-549 --LPNTPGLEDE--NLANRLEEYQRIYSA---TLTQMNVLGQGNLDMFKQNA---EQKQ  
En.638.865-Ent638\_2457-yp\_001177177.1--36H-COG1/1-555 --ITPQPAM-E--QASLNI DEKYKNYAA---GLAELIQFLESGNTDAYFAQPT---CGMQ  
Sa.bon.1474-SBG\_1755-yp\_004730609.1--36H-COG1/1-553 --MAPLPAM-V--EASANVDEKYQRYHA---ALAEILQFLDNGNMDAYFAQPT---CGMQ  
Pr.mir.1265-PMI1665-yp\_002151396.1--36H-COG1/1-548 --NQEVIPOEEK--EIFNTVKNDYHVLYS---ALVELHGLMKKGFQDFLQPT---ERYQ  
Cr.sak.579-ESA\_01348-yp\_001437444.1--36H-COG1/1-556 --VTVDVPEIN--AAAGDVQSYRDYQ---ALSELVQVLETNNMAYFAQAT---CGKQ  
Cr.sak.579-ESA\_00560-yp\_001436686.1--36H-COG1/1-555 --SPRLNGQDE--ATASKITEKYQALHD---TLQASIGYLSANNYAYGNLDA---CQAQ  
Sa.ent.407-STM1919-NP\_460876.1--36H-COG1/1-553 --MPLPAM-A--EASANVDEKYQRYQA---ALAEILQFLDNGNMDAYFAQPT---CGMQ  
Ci.kos.578-CKO\_01066-yp\_001452645.1--36H-COG1/1-552 --INPLPEM-A--EASGNVDEKYQRYHA---ALAEVLQFLENGNMDAYFAQPT---CGMQ  
En.asb.1498-Entas\_0424-yp\_004826963.1--36H-COG1/1-549 --LPNTPGLEDE--DLPKQLEEQYRIYSA---TLTQMNVLGQGNLDMFKQNA---EQKQ  
Pantoe.297-Pat9b\_1273-yp\_004115150.1--36H-COG1/1-553 --LPRIKGQSD--AAAALVEAKFSAMAD---LLQSSAFLKANDYPSYGNLDA---CQAQ  
Ed.tar.1771-ETAF\_2264-yp\_005699859.1--36H-COG1/1-555 --LSLSSGHDN--GRAEKVRGLYKARA---DLVSMIEQLQSNIDTAGFQSVLK---NHSS  
Pa.ana.1905-PAJ\_3534-yp\_005936409.1--36H-COG1/1-553 --APALPGQHA--EVTKNVAAAYNKMHM---TMLASVDFLAKNNYQGGYGNLDA---EQKQ  
Pa.vag.184-Pvag\_1203-yp\_003930842.1--36H-COG1/1-552 --MPKAGQSE--AQSTQVQTAYQHMRD---TMLASVDFLAKNNYQGGYGNLDA---EQKQ  
Pantoe.297-Pat9b\_1605-yp\_004115478.1--36H-COG1/1-556 --LPATPGFV--ELRDRLEAYAAAYNN---GLKAMRLRLKQDNYGFMFAQNI---EAKQ  
Cr.sak.579-ESA\_00210-yp\_001436348.1--36H-COG1/1-557 --LPETPGMDE--RLVDRLEEYQRYVYSS---TLAQMNKFLAEGNLEGMFKQNA---EQKQ  
Er.tas.1011-ETA\_pET460340-yp\_001905943.1--36H-COG1/1-543 --HTPGLDR--QYATAATERWQKLE--EGVIPQVRLAQPPALDDYRLHARTVTPALS  
Cr.tur.6-CTU\_36610-yp\_003212024.1--36H-COG1/1-557 --LPETPGQDA--RLVDRLEEYQRYVYSS---TLAKMNKFLAEGNLEGMFKQNA---EQKQ  
Pe.car.1139-PC1\_1159-yp\_003016743.1--36H-COG1/1-556 --LPNTPGLEDE--ALSCKLEASYTAYDK---LLNDIVDSLSSGLLAGAAMKLSG--ATPFLN  
Er.tas.1011-ETA\_14640-yp\_001907403.1--36H-COG1/1-554 --TPDTPGIDP--KLSEELQNYEQFSS---ALQEMTQALENKQLDAMFAQNI---EQKQ  
Pa.vag.184-Pvag\_1725-yp\_003931362.1--36H-COG1/1-556 --IPETPGQDA--TLNDQLDQRFSAYDQ---ALNQLQTALEANDYIAAAPV---APSQ  
Ed.ict.1187-NT01EI\_3742-yp\_002935104.1--36H-COG1/1-525 --APRLPGQDA--ALAAVEHRTFALYR---LLRDSHSLYLAGDYPAYGKLET---QEAQ  
En.638.865-Ent638\_0380-yp\_001175119.1--36H-COG1/1-549 --LPETPGMDE--NLAKQLEEQYRIYSS---TLAQMNVLGQGNLDMFKQNA---EQKQ  
Er.bil.197-Ebc\_25360-yp\_003741914.1--36H-COG1/1-556 --IPNTKGVDP--KVVDLLEQNYVSYSN---ALSTMLDLMQSKQLPEMFKLNI---EQKQ  
Er.tas.1011-ETA\_16910-yp\_001907630.1--36H-COG1/1-543 --HTPGLDR--QYATAATERWQKLE--EGVIPQVRLAQPPALDDYRLHARTVTPALS  
Es.fer.1173-EFER\_3055-yp\_002384154.1--36H-COG1/1-603 --LIDPDRQSE--TAAIETKRYDIYHN---ALAEILQLLGGNLEFDDQPT---EQKQ  
Xe.nem.162-XNC1\_1619-yp\_003711880.1--36H-COG1/1-520 --LPQIQDNQKRDITLLEVEVQAHREYFH---ALKELKDFLYGGDFQAFDQPT---EDHQ  
En.clo.1544-ecwsu1\_02811-yp\_004952664.1--36H-COG1/1-559 --ITPQPAM-A--QVSNQIDKYNYAYA---GLTELIQFLESGNTDAYFAQPT---CGMQ  
Di.dad.235-Dda3937\_03500-yp\_003882750.1--36H-COG1/1-553 --SEHIGVDK--DVVQMQTDDVWGRLLQ---SGVEPMLTAVKDGRRDFFRQLFRKQYPPLS  
Xe.bov.105-XBJ1\_1924-yp\_003467828.1--36H-COG1/1-523 --LPQIEKNQDSVALAAVERSYQYIN---ALKELKILYLYEGNFQAFDQPT---ENYQ  
Rahnel.1320-Rahaq\_1831-yp\_004212576.1--36H-COG1/1-556 --LPRRTEKAV--ALTAVNKASYQQLHD---MLQTLLEKLSGNGMFLNGPA---ERYQ  
Ra.aqu.1678-Q7S\_08965-yp\_005401598.1--36H-COG1/1-556 --LPRRTEKAV--ALTAVNKASYQQLHD---MLQTLLEKLSGNGMFLNGPA---ERYQ  
Cr.sak.579-ESA\_01126-yp\_001437230.1--36H-COG1/1-514 --LSPGFLDP--AVSQVIADWQKLLD---DGVIPQMKLAREGTPDAYRAHAGKVTVPFS  
Pe.atr.485-ECA2712-yp\_050803.1--36H-COG1/1-560 --AGHVGVDK--EADNMIAASWTQLLD---NGLTPMLNAAARNRQEEFRQLFRKQYPPLS  
En.clo.1544-ecwsu1\_00560-yp\_004950421.1--36H-COG1/1-597 --LPRDQVND--ADATEIKRNYDIYHG---ALAEILQLLGGNLEFDDQPT---QSQY  
Di.dad.235-Dda3937\_03498-yp\_003882752.1--36H-COG1/1-561 --ADQVGVDK--ALVDNMITTSALIS---NGIDPMYRALQSNLDEFRRVFRVYPPFS  
Cr.tur.6-CTU\_27880-yp\_003211151.1--36H-COG1/1-514 --LSPGFLDP--AVSQVIADWQKLLD---DGVIPQMKLAREGTPDAYRAHAGKVTVPFS  
Pe.car.1139-PC1\_1669-yp\_003017246.1--36H-COG1/1-560 --SEHVGVSQ--ETADNMIAAWTQLLD---NGLTPMLNAAARNRQEEFRQLFRKQYPPLS  
Ra.aqu.1678-Q7S\_14450-yp\_005402672.1--36H-COG1/1-551 --IDHGNLDS--NTVDIYNSFTLFFN---SAVFPMYESAAYKNTSLFASLKNDKYLPRL  
Ci.kos.578-CKO\_03622-yp\_001455137.1--36H-COG1/1-517 --LPETPGLEDE--HLADRLEEYQGIYSA---TLAKMNFLAAGKLEEMFKQNA---EQKQ  
Di.zea.1140-Dd1591\_2408-yp\_003004728.1--36H-COG1/1-557 --SPQTGSID--HLADRLEEYQGIYSA---TLAKMNFLAAGKLEEMFKQNA---EQKQ  
Di.zea.1140-Dd1591\_2406-yp\_003004726.1--36H-COG1/1-559 --APHIGVEQ--KITDEMVSWSALIA---TAIEPMTALQKNDLDAFRNVFRKTYPPAS  
Ed.ict.1187-NT01EI\_2801-yp\_002934203.1--36H-COG1/1-554 --LSLSSGHDN--GRAEKVRGLYKARA---DLVTMIEFLQNNVDAFQSVLK---NRSS  
Pe.car.1139-PC1\_1384-yp\_003016966.1--36H-COG1/1-559 --AEHVGVDEP--ATVDVSKTWSALIA---TAIDPMNAAALQRNDYEGFRQFRNRYVYPPS  
Rahnel.1320-Rahaq\_2866-yp\_004213595.1--36H-COG1/1-551 --IDHGNLDS--NTVDIYNSFTLFFN---SAVFPMYESAAYKNTSLFASLKNDKYLPRL  
Pe.atr.485-ECA1281-yp\_049387.1--36H-COG1/1-556 --LPNTPGLEDE--ALSCKLETSYAYDK---LLNDIVDSLSSGLLAGAAMKLSG--ATPFLN  
Pectob.2320-W5S\_1886-yp\_006282848.1--36H-COG1/1-549 --AGHVGVDK--ETANNMIAAWTQLLD---NGLTPMLNAAARNRQEEFRQLFRKQYPPLS  
Pectob.2320-W5S\_1696-yp\_006282659.1--36H-COG1/1-559 --AEHVGVDEP--ATVDVSKTWSALIA---TAIEPMTALQKNDYEGFRQFRNRYVYPPS  
Di.zea.1140-Dd1591\_2407-yp\_003004727.1--36H-COG1/1-555 --SEHIGVDK--EIVRQMDIVWGRLLQ---SGVEPMLTISKNRMDYEGFRQFRNRYVYPPS  
Pe.atr.485-ECA1509-yp\_049611.1--36H-COG1/1-559 --SEHVGVSQ--ATVDVSKTWSALIA---SSIEPMSALQRNDYEGFRQFRNRYVYPPS  
Pa.vag.184-Pvag\_1724-yp\_003931361.1--36H-COG1/1-520 --LPATPGLEV--ALRDKLEADYQYQEK---GLKGMVTSLQARDLEGMFKQNI---EQKQ  
Pa.ana.1905-PAJ\_1541-yp\_005934417.1--36H-COG1/1-520 --IPETPGADT--EMRDRQLQNDFKAYLT---GLRGMIASLKAADLEGMFKQNI---EQKQ  
Mo.mor.2189-MU9\_1596-yp\_007505015.1--36H-COG1/1-519 --ISPGFMDV--QMSEKVIARWQALYD---EGVKIQMLAEQDQAGYRQKSHDVTPLS  
Pr.mir.1265-PMI2808-yp\_002152509.1--36H-COG1/1-563 --LSAQPTQD--QRMAEIKQLYQKRSY---DLDLVLQVQVNERNTYRILK---CPAN  
Di.zea.1140-Dd1591\_0395-yp\_003002764.1--36H-COG1/1-556 --TDHANIST--KSIDDIYNSYQLFS---EAIVPMPLDARQNNHDAYAKLMSEKNYPLR  
En.clo.1544-ecwsu1\_03786-yp\_004953635.1--36H-COG1/1-515 --ISPGFMDV--QVSAQVIGSWQALLE---QGVTPMQQAKQSSLEGYRQANNIYPPLS  
Pectob.2320-W5S\_3170-yp\_006284116.1--36H-COG1/1-556 --LPNTPGLEDE--SLSKLLEESYAYDK---LLNDIVDSLSSGLLAGAAMKLSG--ATPFLN  
Di.dad.235-Dda3937\_02184-yp\_003884754.1--36H-COG1/1-556 --TDHANISS--TTIDDIYNSYQLFS---EAIVPMPLDARQNNHDAYAKLMSEKNYPLR  
Ci.rod.62-ROD\_32641-yp\_003366748.1--36H-COG1/1-517 --LPETPGLEDE--HLADRLEEYQGIYSA---TLAKMNVLVAGKLEEMFKQNA---EQKQ  
Di.dad.235-Dda3937\_03499-yp\_003882751.1--36H-COG1/1-561 --SEHVGVDE--ALAKQMVDDVWGRLLQ---NGMAPMLAAVNEGRNDDFFQLYRQYMPPLS  
Di.dad.235-Dda3937\_00105-yp\_003883346.1--36H-COG1/1-561 --IPPLPVQDA--ALAKNINDNYQALRS---VLQRIVELIKTQDVKTIQALPT---AQKQ  
Pantoe.297-Pat9b\_1604-yp\_004115477.1--36H-COG1/1-555 --TPDTPGQSD--QLNKHLDETYAAYAS---ALNQMQAALQANEIEKAGQLPV---PMSQ  
Er.tas.1011-ETA\_14660-yp\_001907405.1--36H-COG1/1-560 --ELPAGVDNQ--PHVQAVNDHFNILHN---ALSELMRMLTSGDFKGFVDQPT---TGFO  
Pr.mir.1265-PMI2809-yp\_002152510.1--36H-COG1/1-575 --SAENADFR--EKVAKMKKLFQRVIY---DLDQLVSCLEIRDYGGFQSLYA---HNTN  
Ed.tar.1771-ETAF\_3053-yp\_005700648.1--36H-COG1/1-516 --APRLPGQDA--ALAAEVERRFTALYS---LLRDSRYLRAGDYPAYNLDT---QAAQ  
Se.pro.864-Spro\_1415-yp\_001477647.1--36H-COG1/1-546 --LSQSEQSN--ERTKNVKNLYEKARG---DLLQLIISLEDDGVTITRFQSIMH---NSSS  
Di.zea.1140-Dd1591\_1804-yp\_003004134.1--36H-COG1/1-562 --IPPLPVQDA--ALAKNINDNYLALRL---ILQQLIVELIKTQDVKTIQALPT---CQAQ  
Di.dad.235-Dda3937\_03501-yp\_003882749.1--36H-COG1/1-575 --SRQVGVSD--EQVQQLIASWEQVLG---NAVEPMSALKDGRIDEFKRVFLKQYPPMS  
Pantoe.297-Pat9b\_0851-yp\_004114731.1--36H-COG2/1-524 --IQITAVGK--KKIAGLLDASHLFEQ---QKQDVLVAVLKSGLLEASSTFVLKIKITDQ  
Pa.vag.184-Pvag\_0291-yp\_003929953.1--36H-COG2/1-525 --IQTVPVKG--KKIAGLLASSQAFEQ---VKTEILGLIKAGNFDAASAYVLLKSMATQ  
En.clo.1544-ecwsu1\_03886-yp\_004953735.1--36H-COG2/1-519 --ALQDPESQ--RVLAEIRGVRQYQLD---SRYRILQAVQNNDRAGAIQEMMTTKLQ  
Cr.tur.6-CTU\_04790-yp\_003208842.1--36H-COG2/1-515 --TLTDDASR--QALAQIADVRKQYLA---SRFRILQAVQNNDRAGAIQEMMTTKLQ  
Ci.kos.578-CKO\_04484-yp\_001455975.1--36H-COG2/1-521 --SRHDEASK--AI IAGIRDVRQYLA---SRFRILQEIQNYNRPAAIQEMMTTKVNIQ  
Cr.sak.579-ESA\_03488-yp\_001439539.1--36H-COG2/1-515 --TLTDDASR--QALAQIADVRKQYLA---SRFRILQAVQNNDRAGAIQEMMTTKVNIQ  
Ci.rod.62-ROD\_48071-yp\_003368199.1--36H-COG2/1-521 --PLNDDSR--KLLAGIREVREYQYLA---SRFRILQAVQNNDRAGAIQEMMTTKVNIQ  
Sa.bon.1474-SBG\_2851-yp\_004731664.1--36H-COG2/1-521 --HRHDAASQ--KIITEIRARQYQLE---SRFRILQDIQSHNRQAAIQEMMTTKVNIQ  
Sa.ent.407-STM3216-NP\_462130.1--36H-COG2/1-521 --NRHDAASQ--KIITEIRARQYQLE---SRFRILQDIQSHNRQAAIQEMMTTKVNIQ  
En.asb.1498-Entas\_3753-yp\_004830248.1--36H-COG2/1-519 --ELDRHRKQ--QVLADIRGVRQYLD---SRFRILQAVQNNDRAGAIQEMMTTKVNIQ  
Mo.mor.2189-MU9\_3389-yp\_007506806.1--36H-COG2/1-521 --TLKDEASQ--NILKEIRSVRQYQYLT---SQRRMVQSQNGDEASAINEMVNTAGIQ  
Sa.ent.404-STY3394-NP\_457606.1--36H-COG2/1-522 --ENSHDASQ--KIITEIRARQYQLE---SRFRILQDIQSHNRQAAIQEMMTTKVNIQ  
En.638.865-Ent638\_3526-yp\_001178235.1--36H-COG2/1-519 --SLQDKKSQ--QILAGIAAVRQYELD---SRFRILQAVQNNDRAGAIQEMMTTKVNIQ  
Pe.atr.485-ECA1774-yp\_049874.1--36H-COG2/1-554 --SVNDRSIV--AVLRDISDIRDFLQ---SANKLSSLI SAGNTDAAIEFNVTRVYQ  
En.638.865-Ent638\_2119-yp\_001176845.1--36H-COG2/1-549 --LLRDFEKG--AFFRAIQETRGYLV---LRKEGLEMAEQYENMSEFISTRMPVPT

Pectob.2320-W5S 2813-YP 006283770.1--36H-COG2/1-554  
Di.zea.1140-Dd1591\_0695-YP 003003055.1--36H-COG2/1-561  
Pa.vag.184-Pvag\_pPag30079-YP 003729820.1--36H-COG2/1-546  
Er.bill.197-Ebc 38940-YP 003743272.1--36H-COG2/1-526  
Ra.aqu.1678-Q7S 24891-YP 005419232.1--36H-COG2/1-554  
En.asb.1498-Entas 2287-YP 004828805.1--36H-COG2/1-513  
Rahnel.1320-Rahaq 4869-YP 004215574.1--36H-COG2/1-554  
Di.dad.235-Dda3937\_00027-YP 003883574.1--36H-COG2/1-554  
Pr.stu.1965-S70 05790-YP 006215722.1--36H-COG2/1-520  
En.638.865-Ent638 2100-YP 001176826.1--36H-COG2/1-512  
Pe.car.1139-PC1 2526-YP 003018093.1--36H-COG2/1-554  
Mo.mor.2189-MU9 702-YP 007504121.1--36H-COG2/1-525  
Pe.car.1139-PC1 3443-YP 003018995.1--36H-COG2/1-511  
Pa.ana.1905-PAJ 0915-YP 005933791.1--36H-COG2/1-559  
Pectob.2320-W5S 3736-YP 006284671.1--36H-COG2/1-510  
Pe.atr.485-ECA0183-YP 048310.1--36H-COG2/1-553  
Rahnel.1320-Rahaq 3107-YP 004213828.1--36H-COG2/1-503  
Pe.car.1139-PC1 4071-YP 003019622.1--36H-COG2/1-553  
Di.dad.235-Dda3937\_03462-YP 003884507.1--36H-COG2/1-563  
Ra.aqu.1678-Q7S 15665-YP 005402913.1--36H-COG2/1-503  
Pectob.2320-W5S 4505-YP 006285423.1--36H-COG2/1-555  
Pe.atr.485-ECA3642-YP 051730.1--36H-COG2/1-551  
Pe.car.1139-PC1 1417-YP 003019699.1--36H-COG2/1-554  
En.asb.1498-Entas 4509-YP 004821569.1--36H-COG2/1-559  
Pa.ana.1905-PAJ 3064-YP 005935940.1--36H-COG2/1-544  
Pectob.2320-W5S 1733-YP 006282696.1--36H-COG2/1-535  
Pe.atr.485-ECA4334-YP 052421.1--36H-COG2/1-556  
Di.zea.1140-Dd1591\_1602-YP 003003935.1--36H-COG2/1-554  
Pectob.2320-W5S 4506-YP 006285424.1--36H-COG2/1-540  
Di.zea.1140-Dd1591\_1453-YP 003003794.1--36H-COG2/1-532  
Pectob.2320-W5S 0106-YP 006281117.1--36H-COG2/1-556  
Di.zea.1140-Dd1591\_0769-YP 003003127.1--36H-COG2/1-505  
Ra.aqu.1678-Q7S 18035-YP 005403387.1--36H-COG2/1-535  
Rahnel.1320-Rahaq 3579-YP 004214298.1--36H-COG2/1-535  
Pe.car.1139-PC1 4072-YP 003019623.1--36H-COG2/1-540  
Pe.car.1139-PC1 3464-YP 003019016.1--36H-COG2/1-551  
Pe.car.1139-PC1 0111-YP 003015709.1--36H-COG2/1-556  
Pe.atr.485-ECA0182-YP 048309.1--36H-COG2/1-542  
Pectob.2320-W5S 3753-YP 006284688.1--36H-COG2/1-551  
Pa.ana.1905-PAJ 2666-YP 005935542.1--36H-COG2/1-514  
Ci.rod.62-ROD 16161-YP 003365194.1--36H-COG6/1-557  
En.asb.1498-Entas 2095-YP 004828614.1--36H-COG6/1-563  
En.638.865-Ent638 1961-YP 001176688.1--36H-COG6/1-563  
Cr.sak.579-ESA 01710-YP 001437800.1--36H-COG6/1-565  
Cr.tur.6-CTU 22440-YP 003210607.1--36H-COG6/1-565  
Ci.kos.578-CRO 01456-YP 001453025.1--36H-COG6/1-562  
Rahnel.1320-Rahaq 1930-YP 004212674.1--36H-COG6/1-566  
Pantoe.297-Pat9b 2403-YP 004116261.1--36H-COG6/1-564  
Er.bill.197-Ebc 26700-YP 003742048.1--36H-COG6/1-567  
Pectob.2320-W5S 1760-YP 006282723.1--36H-COG6/1-570  
Pa.ana.1905-PAJ 1621-YP 005934497.1--36H-COG6/1-568  
En.clo.1544-EcWSU1\_02120-YP 004951978.1--36H-COG6/1-576  
Ra.aqu.1678-Q7S 09815-YP 005401764.1--36H-COG6/1-566  
Ye.pse.585-YPTB2412-YP 070925.1--36H-COG6/1-579  
Ye.ent.378-YE2588-YP 001006789.1--36H-COG6/1-579  
Di.dad.235-Dda3937\_02787-YP 003883649.1--36H-COG6/1-572  
Pa.vag.184-Pvag 1800-YP 003931435.1--36H-COG6/1-568  
En.bac.2261-D782 2307-YP 007340470.1--36H-COG6/1-558  
Pe.atr.485-ECA1683-YP 049784.1--36H-COG6/1-573  
Pe.car.1139-PC1 2617-YP 003018183.1--36H-COG6/1-573  
Di.zea.1140-Dd1591\_1535-YP 003003868.1--36H-COG6/1-574  
Di.zea.1140-Dd1591\_3580-YP 003005868.1--36H-COG6/1-572  
Es.col.1836-Y75 p1397-YP 489687.1--36H-COG6/1-546  
Pe.atr.485-ECA3902-YP 051990.1--36H-COG6/1-575  
Sa.bon.1474-SBG 1454-YP 004730321.1--36H-COG6/1-537  
Sa.ent.407-STM1626-NP 460585.1--36H-COG6/1-541  
Pe.car.1139-PC1 3679-YP 003019230.1--36H-COG6/1-567  
Pectob.2320-W5S 4020-YP 006284955.1--36H-COG6/1-575  
Di.zea.1140-Dd1591\_0523-YP 003002884.1--36H-COG6/1-568  
Di.dad.235-Dda3937\_02665-YP 003881279.1--36H-COG6/1-572  
---SVNDDKSV--TVLRDIDGIRRDIFLG---SANKLSSLSVAGNTDAAAEYFNVTRVTO  
---DESQDASQ--ALISDIHRIRVQFLA---SGQKIGELVKNHDRREAALEEFNQHLDPQO  
---MLKAPKSR--ELIASIRSTGTQYLA---FSDDVVALGMAGKRDEAAQQLLGPYQTO  
---LQTTFVGI--KKIQAVKEAAQTFET---AKSTLLEMI RAGKQDEAAEFALQKMTTPO  
---IQSTVTGK--QKIKTLQEAGTFET---AKEQLIALARAGDMGATEFVLRKLTTSQ  
---LSWTAKEA--PVIDATAEHLAQFGAGVQDMQTAMA AVKANKGDATAEQAL---KTAE  
---IQSTVTGK--QKIKTLQEAGTFET---AKEQLIALARAGDMGATEFVLRKLTTSQ  
---SAKDARS I--SLLNDIQIRSEYSV---SGNKLMDLASRGNKQEAVALINVSLSLQ  
---NAKDPQSI--AVLAETVDVRRERFLO---SQARLSEFLNNNNNSAAIDEMMNKTSAQI  
---LWETPQEG--VINAI AENLARFESSVAEMQTAMAALNANKDDTTAQOAL---KVAE  
---SVSDDKSV--AVLRDIDGIRRDIFLG---SANKLSSLSVAGNTDAAAEYFNVTRVTO  
---FGMDPQGR--ALLDKMI ADEKHYAA---VTREVLDDQQGRHEEAI AKMMDAEYAS  
---GNWPAEDK--SAIQDISASLNAYLT---QRQQVMSPTVS---QOTLSELNNQMAQLO  
---QVNTPQGS--EIFTRLKARAEFLFLP---FIDEVVALAQOQKGSDDATQLLFGPRYQTO  
---GYWPAEDK--SAIQDISASLNAYLT---QRQQVMSPTVS---QOTLSELNNQMAQLO  
---QTVESRSV--TQLRAIRAIRTEFLK---SGDKI ISEVVAGNREAAIEEFNNNLNVVQ  
---YSWDPQDQ--RLVETMPENIRRYRE---SQWHTLNPAGSDAEKITAQLAEAGLALT  
---QNVPEARS--SQLRDIRAIRNEFLK---SGDKI ISEVVAGNREAAIEEFNNNLNVVQ  
---NESNDPQO--QLIGDIRLIRAKFLE---SGQKVI ALVUKANNREAEALNEFNQNLNPAQ  
---YSWDPQDQ--RLVETMPENIRRYRE---SQWHTLNPAGSDAEKITAQLAEAGLALT  
---QTVESRSV--TQLRAIRAIRTEFLK---SGDKI ISEVVAGNREAAIEEFNNNLNVVQ  
---LISTPEEK--ALFDKVG EYRQSYIK---KRDAI ITEKGAGNFDRAITLDFNEFVPAS  
---SITSKQGR--ELFNQLDIRKQYSV---SINKAIDYAMDEG DALATELVLFGDIAAQI  
---IGGEGGRAE--KELDEVMESSDKLVN---ASNHVFEALNAGHVDEAKRQLNSEAVPLS  
---EVASVTGR--QLFSNIQSHAAFLFLP---LMDKVVALAQOQKKEADQLLQASGDNIQ  
---RINAGKGR--ELFNQLDIRKQYSV---SINKAVDYAMEG DALATELVLFGDIAAQI  
---STA EKHAQ--ELVAELQVRVPAYSS---SMANAI TLAMANNKSEAQHLLLTLDVRAKQ  
---SVKDDEHS--SLLHEIQIRSEYSV---SGNKIMDLASRGNKQEAVALINVSLSLQ  
---DASGERSR--KQGVVVRGFAEFIK---SGDQI ISDALAGNNDVAIEFNNTLNVIQ  
---TYLTPPEE--RLADQLAENLQRYNR---EGVQPTDAIIRAGQTDMA LRLYDDKVSAL E  
---STVDKHAQ--GLVTILEQVRVPAYSS---AMKEAI ITEKGAGNFDRAITLDFNEFVPAS  
---NAPWPEED--SGIRQVTRMLEYATS---QRKQVLKPDAS---QQVLSDLNAQMATIQ  
KEHSDVTDKDR---QFVTAISNAEEGYRP---VAKHIVDLALEEKKAEAI DRMNRELRPQL  
KEHSDVTDKDR---QFVTAISNAEEGYRP---VAKHIVDLALEEKKAEAI DRMNRELRPQL  
---NTSGLLAR--KQGVVVRGFAEFIK---SGDKI ISEVVAGNREAAIEEFNNNLNVVQ  
---LISTPEEK--ALFDKVG EYRQSYIK---KRDAI ITEKGAGNFDRAITLDFNEFVPAS  
---SATEKHAQ--ELVAELQVRVPAYSS---SYTNAI TLAMANNKSEAQHLLLTLDVRAKQ  
---NAGSERSR--KQIETIRVLAEFIK---SGDKI ISDALAGNNDVAIEFNNTLNVIQ  
---LISTPEEK--ALFDKVG EYRQSYIK---KRDAI ITEKGAGNFDRAITLDFNEFVPAS  
---EDSTPADR--EAFDKVISSEGEVPLA---VLDHAGQLGLQNKQKEAI SYLKTIVRPLQ  
---RAVKTQAE--ALDAELQRYKAYLA---GLQPMLKYAKNGMFEAI INHENEQARPLD  
---RAVRTPADE--ALDADLKARYDAYIA---GLQPMLKYAKNGMFEAI INHENEQARPLD  
---RSVRTPADE--ALDNDLKRFRDAYIT---GLQPMLKYAKNGMFEAI INHENEQARPLD  
---RASHEDAEA--ALDSELKARYDAYIS---GLAPMLKYAKNGMFEAI INHENEQARPLD  
---RESHAESA--ALDSELKARYDAYIS---GLTPMLKYAKNGMFEAI INHENEQARPLD  
---RAVKTQAE--ALDAELNTRFKAYID---GLQPMLKYAKNGMFEAI INHENEQARPLD  
---RPNKTDKDR--ALDEPLKKAYDAYLT---QGMAPMLES AKQAHFEFV I SQAETVRGLD  
---RKTKTAE DL--ALDAPLTERFNAYID---KGLKPMI DSAKQGSFEG I AQETDVTTRKLD  
---RRVKTPE DM--ALDGLKTKFDAYVT---QGLLPMVKS AKDGSFEG I AQETDVTTRKLD  
---RPVKTQDV--ALDEDLRKS YDAYV N---QGLMLMLTAAKQGLFEFVITLSEETRILD  
---RKSKTPEGI--KLDEQLQARFKEYVT---KGLMPMIESGKQGSFESI AQETDVTTRKLD  
---RPVRTAEDE--ALDAELKTRFDAYIA---GLQPMVKFAKNGMFEAI INHENEQARPLD  
---RPNKTDKDR--ALDEPLKKAYDAYLT---QGMAPMLES AKQAHFEFV I SQAETVRGLD  
---RPTKSETDM--ALDVPLKKAYEYQRD---DGMKPLMAATKEGHFEFV I SLD AEKISL LD  
---RPIKSETDT--ALDGPLKKAYEYQRD---DGMKMLLEATKEGHFEFV I SLEAEKLNQLD  
---RAVKTQAE--ALDEPLNKAYNDYVE---KGI MPMLKAAKDG YFEE I LTHESEVRVLD  
---REVKT PADM--ELDTTLQARFN DYIN---KGLI PMINAGKGSFEG I AQETDVTTRKLD  
---RRVKTQAE--ALDKELTARYTAYID---GLKPMKYAKNGMFEAI INHENEQARPLD  
---RPVKTQADM--ALDGLRKS YDAYV N---QGLMLMLTAAKQGLFEFVITLSEETRILD  
---RPVKTQDM--ALDDEL RKS YDAYV N---QGLMLMLTAAKQGLFEFVITLSEETRILD  
---RSVKTDM DL--ALDEPLNKAYNDYVE---KGI MPMLKAAKDG YFEE I LTHESEVRVLD  
---REVKT PADM--ALDDALQQR YNDYVS---NGVRPML EAVKAGRYDDVVALEWKQTRKLD  
---RPVKTQAE--ALDETLNQRQYAYIT---GMQPMKYAKNGMFEAI INHENEQARPLD  
---RPDRLESEK--ALDEDILKAYTNYRD---NAIVLMQKATSDGEFEDLVSL ESTLARTLD  
---RAVKTPEDE--ALDNELNARYTAYIN---GLQPMVKFAKNGMFEAI INHENEQARPLD  
---RAVKT PADD--ALDNELNARYTAYIN---GLQPMVKFAKNGMFEAI INHENEQARPLD  
---RPDKLESEK--ALDEDILKAYNNYRD---NAIVVMQKATSDGEFEDLVSL ESTLARTLD  
---RPDRLESEK--ALDEDILKAYNNYRD---NAIVVMQKATSDGEFEDLVSL ESTLARTLD  
---RTDKSSEEK--SLDSDLTTHYIAYRD---KVMVPMVDFVRNGEDDVIETTLARQLD  
---REVKT PADM--ALDDVLDQQR YNDYVN---NGVRPML DAVKAGRYDDVVALEWKQTRKLD



En.clo.1544-ECWSU1\_01962-YP\_004951821.1--36H-COG1/1-553  
En.asb.1498-Entas\_1879-YP\_004828403.1--36H-COG1/1-554  
En.bac.2261-D782\_1748-YP\_007339929.1--36H-COG1/1-547  
Es.col.1836-X75\_p1862-YP\_490148.1--36H-COG1/1-553  
Cr.tur.6-CTU\_33010-QP\_003211664.1--36H-COG1/1-555  
Cr.tur.6-CTU\_25780-YP\_003210941.1--36H-COG1/1-536  
En.clo.1544-ECWSU1\_00403-YP\_004950264.1--36H-COG1/1-549  
En.638.865-Ent638\_2457-YP\_001177177.1--36H-COG1/1-555  
Sa.bon.1474-SBG\_1755-YP\_004730609.1--36H-COG1/1-553  
Pr.mir.1265-PMI1665-YP\_002151396.1--36H-COG1/1-548  
Cr.sak.579-ESA\_01348-YP\_001437444.1--36H-COG1/1-556  
Cr.sak.579-ESA\_00560-YP\_001436686.1--36H-COG1/1-555  
Sa.ent.407-STM1919-NP\_460876.1--36H-COG1/1-553  
Ci.kos.578-CKO\_01066-YP\_001452645.1--36H-COG1/1-552  
En.asb.1498-Entas\_0424-YP\_004826963.1--36H-COG1/1-549  
Pantoe.297-Pat9b\_1273-YP\_004115150.1--36H-COG1/1-553  
Ed.tar.1771-ETAF\_2264-YP\_005699859.1--36H-COG1/1-555  
Pa.ana.1905-PAJ\_3534-YP\_005936409.1--36H-COG1/1-553  
Pa.vag.184-Pvag\_1203-YP\_003930842.1--36H-COG1/1-552  
Pantoe.297-Pat9b\_1605-YP\_004115478.1--36H-COG1/1-556  
Cr.sak.579-ESA\_00210-YP\_001436348.1--36H-COG1/1-557  
Er.tas.1011-ETA\_pET460340-YP\_001905943.1--36H-COG1/1-543  
Cr.tur.6-CTU\_36610-YP\_003212024.1--36H-COG1/1-557  
Pe.car.1139-PC1\_1159-YP\_003016743.1--36H-COG1/1-556  
Er.tas.1011-ETA\_14640-YP\_001907403.1--36H-COG1/1-554  
Pa.vag.184-Pvag\_1725-YP\_003931362.1--36H-COG1/1-556  
Ed.ict.1187-NT01EI\_3742-YP\_002935104.1--36H-COG1/1-525  
En.638.865-Ent638\_0380-YP\_001175119.1--36H-COG1/1-549  
Er.bil.197-Ebc\_25360-YP\_003741914.1--36H-COG1/1-556  
Er.tas.1011-ETA\_16910-YP\_001907630.1--36H-COG1/1-543  
Es.fer.1173-EFER\_3055-YP\_002384154.1--36H-COG1/1-603  
Xe.nem.162-XNC1\_1619-YP\_003711880.1--36H-COG1/1-520  
En.clo.1544-ECWSU1\_02811-YP\_004952664.1--36H-COG1/1-559  
Di.dad.235-Dda3937\_03500-YP\_003882750.1--36H-COG1/1-553  
Xe.bov.105-XBJ1\_1924-YP\_003467828.1--36H-COG1/1-523  
Rahnel.1320-Rahaq\_1831-YP\_004212576.1--36H-COG1/1-556  
Ra.aqu.1678-Q7S\_08965-YP\_005401598.1--36H-COG1/1-556  
Cr.sak.579-ESA\_01126-YP\_001437230.1--36H-COG1/1-514  
Pe.atr.485-ECA2712-YP\_050803.1--36H-COG1/1-560  
En.clo.1544-ECWSU1\_00560-YP\_004950421.1--36H-COG1/1-597  
Di.dad.235-Dda3937\_03498-YP\_003882752.1--36H-COG1/1-561  
Cr.tur.6-CTU\_27880-YP\_003211151.1--36H-COG1/1-514  
Pe.car.1139-PC1\_1669-YP\_003017246.1--36H-COG1/1-560  
Ra.aqu.1678-Q7S\_14450-YP\_005402672.1--36H-COG1/1-551  
Ci.kos.578-CKO\_03622-YP\_001455137.1--36H-COG1/1-517  
Di.zea.1140-Dd1591\_2408-YP\_003004728.1--36H-COG1/1-557  
Di.zea.1140-Dd1591\_2406-YP\_003004726.1--36H-COG1/1-559  
Ed.ict.1187-NT01EI\_2801-YP\_002934203.1--36H-COG1/1-554  
Pe.car.1139-PC1\_1384-YP\_003016966.1--36H-COG1/1-559  
Rahnel.1320-Rahaq\_2866-YP\_004213595.1--36H-COG1/1-551  
Pe.atr.485-ECA1281-YP\_049387.1--36H-COG1/1-556  
Pectob.2320-W5S\_1886-YP\_006282848.1--36H-COG1/1-549  
Pectob.2320-W5S\_1696-YP\_006282659.1--36H-COG1/1-559  
Di.zea.1140-Dd1591\_2407-YP\_003004727.1--36H-COG1/1-555  
Pe.atr.485-ECA1509-YP\_049611.1--36H-COG1/1-559  
Pa.vag.184-Pvag\_1724-YP\_003931361.1--36H-COG1/1-520  
Pa.ana.1905-PAJ\_1541-YP\_005934417.1--36H-COG1/1-520  
Mo.mor.2189-MU9\_1596-YP\_007505015.1--36H-COG1/1-519  
Pr.mir.1265-PMI2808-YP\_002152509.1--36H-COG1/1-563  
Di.zea.1140-Dd1591\_0395-YP\_003002764.1--36H-COG1/1-556  
En.clo.1544-ECWSU1\_03786-YP\_004953635.1--36H-COG1/1-515  
Pectob.2320-W5S\_3170-YP\_006284116.1--36H-COG1/1-556  
Di.dad.235-Dda3937\_02184-YP\_003884754.1--36H-COG1/1-556  
Ci.rod.62-ROD\_32641-YP\_003366748.1--36H-COG1/1-517  
Di.dad.235-Dda3937\_03499-YP\_003882751.1--36H-COG1/1-561  
Di.dad.235-Dda3937\_01005-YP\_003883346.1--36H-COG1/1-561  
Pantoe.297-Pat9b\_1604-YP\_004115477.1--36H-COG1/1-555  
Er.tas.1011-ETA\_14660-YP\_001907405.1--36H-COG1/1-560  
Pr.mir.1265-PMI2809-YP\_002152510.1--36H-COG1/1-575  
Ed.tar.1771-ETAF\_3053-YP\_005400648.1--36H-COG1/1-516  
Se.pro.864-Spro\_1415-YP\_001477647.1--36H-COG1/1-546  
Di.zea.1140-Dd1591\_1804-YP\_003004134.1--36H-COG1/1-562  
Di.dad.235-Dda3937\_03501-YP\_003882749.1--36H-COG1/1-575  
Pantoe.297-Pat9b\_0851-YP\_004114731.1--36H-COG2/1-524  
Pa.vag.184-Pvag\_0291-YP\_003929953.1--36H-COG2/1-525  
En.clo.1544-ECWSU1\_03886-YP\_004953735.1--36H-COG2/1-519  
Cr.tur.6-CTU\_04790-YP\_003208842.1--36H-COG2/1-515  
Ci.kos.578-CKO\_04484-YP\_001455975.1--36H-COG2/1-521  
Cr.sak.579-ESA\_03488-YP\_001439539.1--36H-COG2/1-515  
Ci.rod.62-ROD\_48071-YP\_003368199.1--36H-COG2/1-521  
Sa.bon.1474-SBG\_2851-YP\_004731664.1--36H-COG2/1-521  
Sa.ent.407-STM3216-NP\_462130.1--36H-COG2/1-521  
En.asb.1498-Entas\_3753-YP\_004830248.1--36H-COG2/1-519  
Mo.mor.2189-MU9\_3389-YP\_007506806.1--36H-COG2/1-521  
Sa.ent.404-STY3394-NP\_457606.1--36H-COG2/1-522  
En.638.865-Ent638\_3526-YP\_001178235.1--36H-COG2/1-519  
Pe.atr.485-ECA1774-YP\_049874.1--36H-COG2/1-554  
En.638.865-Ent638\_2119-YP\_001176845.1--36H-COG2/1-549

DDMEGVYNNRWRAE--NNTLLKAAEENQSSFTQMOWTLAAI FLAVIAVLVVIWQGLQHL  
DNMEAVNNRWRAE--NNTLLKAAEENQSSFTHMOWTLAAI FLAVIAVLVVIWQGLQHL  
NAMGEAMGVYRAQ--SESLYQQAFTTSSHDYQFARWQLMIALVLAVALVAVFGIRRL  
NAMGEAFQAQYALS--SEKLYRDVITDNADDYRFAQWQLVIAVLVVIWQGLQHL  
DEMEEYITWRAQ--NTLLQAAAQENQSSFTGMLWTLGII IAI IVVLAITWQGLRHLL  
NALEKAVTRYDDV--NVRLAQQAQWDESRDFRLAQWQTALAVLVVVLVIALVWYGRHLL  
TAMQNVYREWREA--QAVLTDGRIKDNENDYKRILWILSAVMLLVIAVIVSSWIAMRRVLL  
NALGTALKKEYDTA--SSQYLTALTETRDDYRFAKQWMAI LALALVIVLVGVVYGRHLL  
NALGALGNARA--SEKQYRQTFDQSAHDYRFAQWQLGILAVLVVLLVWVYGRQALL  
TAMENSFNTRYMNY--VQHEVADSIEQGHFFYI IALMFI GAITMVLVSVIASHRWLNFII  
NALEKAVTRYDDV--NVRLAQQAQWDESRDFRVAQWQTGLAVLVVVLVIALVWYGRHLL  
DEMEEYITWRAQ--NTLLQAAAQENQSSFTGMLWTLGIVIAVIVILAATWQGLRHLL  
NALGALGNARA--SENLYRQTFDQSAHDYRFAQWQLGILAVLVVLLVWVYGRHLL  
NALGALGNARA--SEKLYSKAFDESARDYHFAQWQLGILAVLVVLLVWVYGRHLL  
NAMQKVYHEWRWA--QAKLANKGIKDNESDYKRILWILSAVMLLVIAVIVSSWIAMRRVLL  
DDLEDAYKQWRAQ--NVELLAQGSAAENSAWQHVLMAMVAVVLLVLAVALVVRILL  
SGFMSLDEASDYVANQII SPASQAAAANYRQMIPLTI GFMLFLAMTALVIVVWRNHI  
DNLDKAYQKWRSA--NYQLMKQIAAENDSNYSNMLWTLII IAI IALVTVA TWAGLRLL  
DQLDITAYEAWRW--NIQLMKDTSLNHQRSLTDLALLAIGLITGVI GAVWMLGQKLLI  
VAMKGTYBTRWK--QGELAAAGVQNERAFTTMMWLLGSTMVAVVIAVIVSSWIAMRRVLL  
NAMQVYREWRAE--QAKLASKGVKDNESDYERILWILSAVMLLVIAVIVSSWIAMRRVLL  
REFGASVEKFNFA--AAAKLDQTRINGEHLISTTKTVLILAMLVGIAILLTDRLVAMLV  
NAMQVYREWRAE--QAKLSSQGVKDNESDYQRI LWILSAVMLLVIAVIVSSWIAMRRVLL  
VAMQDAYITWRAA--QNQLSDDGLKENHAFFETMLLWLLGALSUVVVLVILSWIGLQRI  
VAMQDAYITWRAA--QNRLIEQGIKDNQQAANYHMLWAVAMITLVLALVLCVWFLGRVLI  
SAFLTYREWRAE--QSRLLTLGVAENSAYTRMMWLLSAIAMAIVAVIVLWGLGRKIV  
EAMAKIYAWQWRA--NHGLLQQGI DANQRSFGRMVPLTAGI ALAVLVVLLI ILAGAVRIGLL  
QAMQKVYREWRAE--QAKLTDKGI VDNENDYQRI LWILSAVMLLVIAVIVSSWIAMRRVLL  
NDMQQAYTLWRTA--LNEITVQGVQANEAYSKMLWVIGTIMLVVALIALCVWGLRKLII  
REFGASVEKFNFA--AAAKLDQTRINGEHLISTTKTVLILAMLVGIAILLTDRLVAMLV  
NGFEKQYIEMWQ--NDRLYDIAVEDNDSSYSHAMLLAGLITAVLAVIVAVWGLRKHSLV  
RMEIAYNNYMQV--LNSNIVEVRADAAFYKIALAMFFGSI LMFVTAIATHWMLKRLL  
NALGALGNARA--SGDYLQSAFTQSQNDYRFAKQWMAVMAVIALVIVLVWYGRHLL  
VEFGGVADKYVTA--IQS--DDAI ISAEKHIAINKDLLLLVALI IGVIVLFLSDRYLVNYLV  
RQLEAVNNYMQV--LGHNI STAVSDGAFYKVISAMFFGSI LMFVTVASAWMMRRNLL  
DQFQKDVGDYTY--VSARFGEAQQTAAASQVNMINTSVALVLI IALVTRIRIF  
DQFQKDVGDYTY--VSARFGEAQQTAAASQVNMINTSVALVLI IALVTRIRIF  
RAFASAEKFNAA--AGAKLDATREVRDVSMTVTTKTVII IAVI IGLLLLLLTDRLVAMLV  
VDFGFSMDKYVTA--IISSETSMKEVYDLDVWSNY ILLAAVIL IGLLLLLLTDRLVNYLV  
DQFQKDVGDYTY--NDKLYQMAVENSNSYSQAIWLV IASVLAVALVIVAVWGLRQALI  
VAFGEVQAKYAAV--VTN--SDYIDFNVSHNSWTRNLI IALVIVLFLSDRYLVNYLV  
RAFASAEKFNAA--AGAKLDATREVRDVSMTVTTKTVII IAVI IGLLLLLLTDRLVVALV  
VAFGANMEKYQTA--ILSSSETSMNEVYGLVGSNSHIL LGAVALGLLILLLTDRLVNYLV  
RNFSAAIEKYNDK--ITSLNAEANHRITQWVAWQY ILLGAMLSVIMLLSDRYLANFLV  
TAMQDYLLEWRAA--QAEILTNAIQONEQDYQRI LWILSAVMLLVIAVIVSSWIAMRRVLL  
VEFGELTEKYAAA--IQS--DNTIMDVEHYIAI SKNVLAAALI IGVIVLFLSDRYLVNYLV  
WAFGDAQKYVTA--ADFLGTVNEHNSWTRNLI IALV IALV IFLISERYLTRYLV  
SGFMSLDEASDYVANQII SPASQAAAANYRQMIPLTI GFMLFLAMTALVIVVWRNHI  
LAFGEDIKRYSYD--ITA--SSLI PSVNEHNTQNRNAMI AVMI IGLVILFLSDRYLVNYLV  
RNFSAAIEKYNDK--ITSLNAEANHRITQWVAWQY ILLGAMLSVIMLLSDRYLANFLV  
VAMQDAYITWRAA--QNQLSDDGLQENHVAFFETMLLWLLGALSUVVVLVILSWIGLQRI  
VAFGNMDDKYVTA--IMSSSETSMNEVYGLVWSNSY ILLCAVVLGLLILLLTDRLVHYLV  
LTFGGDIKRYSDG--ITA--SSLI PTVNEHNDKRNALIAVMI IGLVILFLSDRYLVNYLV  
VEFGELTEKYAAA--IQS--DEAI IQASQRIAI INKNVLLI IAGLAVVLLI IAGAAARGILL  
LTFGGDIKRYSDG--ITA--SSLI PSVNEHNDKRNRLVIMVIL IGVIVLFLSDRYLVNYLV  
VAMQGSYGEWRAR--QTELSQDQMAQNHKAFTQMMWLLG IGVAVIVVILACVWFLGRQVLI  
QAMQATYSAWRLK--QESLHAGAEVQQAFTQMMWLLG IGVAVIVVILACVWFLGRQVLI  
KEFGASLEATDF--AETRIEQRTRLVDGLMTRIV IISGTLFGLLIL IADRYLVKMMQ  
DNFTNSLVEPTF--ITDDVNSPVSIEADNDYHEMTE IISGTLFGLI FLITFLTYWFKRHII  
VKFTTAINENYQI--IKNLKTEAQGRISAWVYCKVTLI VAMI IGLVVLTDRLYLAIMHG  
RAFGAABENFNA--AARALSTRVVDLSMTTRV IITATI IGLLILFLTDRLVAMLV  
VAMQDAYITWRAA--QNQLSDDGLQENHVAFFETMLLWLLGALSUVVVLVILSWIGLQRI  
VKFTTAINENYQI--IKNLKTEAQGRISAWVYCKVTLI VAMI IGLVVLTDRLYLAIMHG  
KAMQSVYREWRAA--QTELANAGIQDNEKDYQRI LWILSAVMLLVIAVIVSSWIAMRRVLL  
VEFGDVANKYVNA--IQS--DNTI VALKAHIT INKNVLLI IGVIVLFLSDRYLVNYLV  
DAFQSFDAFYFR--NDALNDSAVSDSQNYHYSI IIVAVCVLILFFATTSAWYIRRVLL  
SAFLLDYTPWRAD--QDRLEAGVAANLTA YKRMMLLGLVAMVAVVIVLACVWFLGRKIV  
NGFEQAYDNWQ--TAQLLSAGSAENHAYQRAI WLLSVLVVVLALIAAASGIIHILL  
ERFTQSLYEATDHLSDNVNHAIEAAQGNVQALIFAFIFMSVFLITFVFMVLRHIV  
DAMAEIYAQWRAQ--NHGLLQQGI DANQRSFERMVVTLGAGIALAVVLLI ILAGAAARGILL  
TYFMSALDDTSAVANDITPAAAAAQTSYRQMVPLSLAVIF IFLITLGAVALVIRKIV  
DAFQHFADFYFR--NDALNDAVNSDQNYHYSI IIVAVCVLILMLATTSASAWYIRRVLL  
VEFGELTEKYAAA--IQS--DSTITVGRYIEISKVLLAALI IGVIVLFLSDRYLVNYLV  
NTYLDANAFSAAS--QSEQLRNEGISI IADGSTATIMVTLIFSAVAIVAS IILGFLVLRV  
NKFLQDVAVFNAS--QDSQRLSEGGIVENQQA IITLIFSAALIAA IMLGFLVLRV  
QAYKANQALIAI--QNQEMQAGVQVGDGFKSNRLL ILLITLFSVATGSLIGWIVRSIT  
NEYKSRVQALIKI--QDNHMRERAGVTVAKDFSGNRALT IGLTLVGLVGLSGLMIVRSIT  
QAYKAKVQELIAI--EDTLMRNAGASVDQDFRTNRAQLI LLLALISIAAGVIMGWIVRSIT  
NEYKSRVQALIKI--QDNHMRERAGVTVAKDFSGNRALT IGLTLVGLVGLSGLMIVRSIT  
RAYKDKVQELIAI--EDGMREAGIQVEKDFNANLLLVGMVLAGVIGSLMGLVIRRSIT  
KIYKDKVQELIAI--QDAQMAGVQVGDGFKNTNRLITL IALISIAAGVIMGWIVRSIT  
KAYKDKVQELIAI--QDAQMAGVQVGDGFKNTNRLITL IALISIAAGVIMGWIVRSIT  
KIYKDKVQELIAI--QDMHKEAGNQEVSFKNTNRLITL IALISIAAGVIMGWIVRSIT  
RAYKDKVQELIAI--QDTHMHEASVQKEDFKNNRLITL IALISIAAGVIMGWIVRSIT  
QAYKAKVQELIAI--QNNEMQAGVQVGDGFKSNRLL ILLVLLVLSVIGSTIGWIVRSIT  
AKYTSKVNEDIT--QDDKMSSAQEVGESYRNALMVA IITL IISALAGLVIASLITRSVIT  
QEYNTKLRSLLEL--QNQIINDTHASIKKASNLTELVI VLSVLFGLSGLMIVRSIT

Pectob.2320-W5S 2813-YP 006283770.1--36H-COG2/1-554  
Di.zea.1140-Dd1591\_0695-YP 003003055.1--36H-COG2/1-561  
Pa.vag.184-Pvag\_pPag30079-YP 003729820.1--36H-COG2/1-546  
Er.bill.197-Ebc 38940-YP 003743272.1--36H-COG2/1-526  
Ra.aqu.1678-Q7S 24891-YP 005419232.1--36H-COG2/1-554  
En.asb.1498-Entas 2287-YP 004828805.1--36H-COG2/1-513  
Rahnel.1320-Rahaq 4869-YP 004215574.1--36H-COG2/1-554  
Di.dad.235-Dda3937\_00027-YP 003883574.1--36H-COG2/1-554  
Pr.stu.1965-S70 05790-YP 006215722.1--36H-COG2/1-520  
En.638.865-Ent638 2100-YP 001176826.1--36H-COG2/1-512  
Pe.car.1139-PC1 2526-YP 003018093.1--36H-COG2/1-554  
Mo.mor.2189-MU9 702-YP 007504121.1--36H-COG2/1-525  
Pe.car.1139-PC1 3443-YP 003018995.1--36H-COG2/1-511  
Pa.ana.1905-PAJ 0915-YP 005933791.1--36H-COG2/1-559  
Pectob.2320-W5S 3736-YP 006284671.1--36H-COG2/1-510  
Pe.atr.485-ECA0183-YP 048310.1--36H-COG2/1-553  
Rahnel.1320-Rahaq 3107-YP 004213828.1--36H-COG2/1-503  
Pe.car.1139-PC1 4071-YP 003019622.1--36H-COG2/1-553  
Di.dad.235-Dda3937\_03462-YP 003884507.1--36H-COG2/1-563  
Ra.aqu.1678-Q7S 15665-YP 005402913.1--36H-COG2/1-503  
Pectob.2320-W5S 4505-YP 006285423.1--36H-COG2/1-555  
Pe.atr.485-ECA3642-YP 051730.1--36H-COG2/1-551  
Pe.car.1139-PC1 1417-YP 003016999.1--36H-COG2/1-554  
En.asb.1498-Entas 4509-YP 004821569.1--36H-COG2/1-559  
Pa.ana.1905-PAJ 3064-YP 005935940.1--36H-COG2/1-544  
Pectob.2320-W5S 1733-YP 006282696.1--36H-COG2/1-535  
Pe.atr.485-ECA4334-YP 052421.1--36H-COG2/1-556  
Di.zea.1140-Dd1591\_1602-YP 003003935.1--36H-COG2/1-554  
Pectob.2320-W5S 4506-YP 006285424.1--36H-COG2/1-540  
Di.zea.1140-Dd1591\_1453-YP 003003794.1--36H-COG2/1-532  
Pectob.2320-W5S 0106-YP 006281117.1--36H-COG2/1-556  
Di.zea.1140-Dd1591\_0769-YP 003003127.1--36H-COG2/1-505  
Ra.aqu.1678-Q7S 18035-YP 005403387.1--36H-COG2/1-535  
Rahnel.1320-Rahaq 3579-YP 004214298.1--36H-COG2/1-535  
Pe.car.1139-PC1 4072-YP 003019623.1--36H-COG2/1-540  
Pe.car.1139-PC1 3464-YP 003019016.1--36H-COG2/1-551  
Pe.car.1139-PC1 0111-YP 003015709.1--36H-COG2/1-556  
Pe.atr.485-ECA0182-YP 048309.1--36H-COG2/1-542  
Pectob.2320-W5S 3753-YP 006284688.1--36H-COG2/1-551  
Pa.ana.1905-PAJ 2666-YP 005935542.1--36H-COG2/1-514  
Ci.rod.62-ROD 16161-YP 003365194.1--36H-COG6/1-557  
En.asb.1498-Entas 2095-YP 004828614.1--36H-COG6/1-563  
En.638.865-Ent638 1961-YP 001176688.1--36H-COG6/1-563  
Cr.sak.579-ESA 01710-YP 001437800.1--36H-COG6/1-565  
Cr.tur.6-CTU 22440-YP 003210607.1--36H-COG6/1-565  
Ci.kos.578-CRO 01456-YP 001453025.1--36H-COG6/1-562  
Rahnel.1320-Rahaq 1930-YP 004212674.1--36H-COG6/1-566  
Pantoe.297-Pat9b 2403-YP 004116261.1--36H-COG6/1-564  
Er.bill.197-Ebc 26700-YP 003742048.1--36H-COG6/1-567  
Pectob.2320-W5S 1760-YP 006282723.1--36H-COG6/1-570  
Pa.ana.1905-PAJ 1621-YP 005934497.1--36H-COG6/1-568  
En.clo.1544-EcWSU1\_02120-YP 004951978.1--36H-COG6/1-576  
Ra.aqu.1678-Q7S 09815-YP 005401764.1--36H-COG6/1-566  
Ye.pse.585-YPTB2412-YP 070925.1--36H-COG6/1-579  
Ye.ent.378-YE2588-YP 001006789.1--36H-COG6/1-579  
Di.dad.235-Dda3937\_02787-YP 003883649.1--36H-COG6/1-572  
Pa.vag.184-Pvag 1800-YP 003931435.1--36H-COG6/1-568  
En.bac.2261-D782 2307-YP 007340470.1--36H-COG6/1-558  
Pe.atr.485-ECA1683-YP 049784.1--36H-COG6/1-573  
Pe.car.1139-PC1 2617-YP 003018183.1--36H-COG6/1-573  
Di.zea.1140-Dd1591\_1535-YP 003003868.1--36H-COG6/1-574  
Di.zea.1140-Dd1591\_3580-YP 003005868.1--36H-COG6/1-572  
Es.col.1836-Y75 p1397-YP 489687.1--36H-COG6/1-546  
Pe.atr.485-ECA3902-YP 051990.1--36H-COG6/1-575  
Sa.bon.1474-SBG 1454-YP 004730321.1--36H-COG6/1-537  
Sa.ent.407-STM1626-NP 460585.1--36H-COG6/1-541  
Pe.car.1139-PC1 3679-YP 003019230.1--36H-COG6/1-567  
Pectob.2320-W5S 4020-YP 006284955.1--36H-COG6/1-575  
Di.zea.1140-Dd1591\_0523-YP 003002884.1--36H-COG6/1-568  
Di.dad.235-Dda3937\_02665-YP 003881279.1--36H-COG6/1-572

EKYTSKVKEFIDI-QDDKMSSAQEVSDSYKNALMVLATIILISALAGLI IASLITRSVT  
REYRNAVRRLVDY-HNKAMLGITDMSSTYHDRLVLLMILGGVLLSIWVATITRSVT  
VDYLKTIADLVSF-QEEQMOTARSAAEDERNTATILLLTSLASAAVLLAAAAWLTITRSIT  
NTYLNLASAFADS-QSQQLVAEAGALAGTEGNSAIQITLIFLSALAILAAVLLGYFLARSIV  
NAYLDLATAFANS-QDQQLQAEQKTAIADGATAIQTLTIFLSALAILMAALGYFLTRISIT  
DNVKTAGDNSSAA-IRDIIALVKAHNDALAYSSTITAVGVVIAILFLGILVSWVTRQIT  
NAYLDLATAFANS-QDQQLQAEQKTAIADGATAIQTLTIFLSALAILMAALGYFLTRISIT  
QKYKDKVAEFIDY-QDDQMTSAREEVQRSYTDIRMVWLWVFIISIVAGGLIAWVITRSVT  
REYREKVVQFIEV-QNHRMQASGVIVDGDYHFNKYLITLAIISIVIACIMGWIFLTSIT  
DKVKTAGDSSAS-IREIIALVKIHNDLANSSSTITAVGVVAVLFLGILVSWVTRQIT  
AKYTSKVNFEFIGI-QDDKMSSAQAVGESYKNALMVLATIILISALAGLI IASLITRSVT  
DAYILSFRASRDH-GTETGNQLIQEFNTYERQNSIILV FALLALTLAIVSGVMIIRNLT  
EN-----INKLYFTEESRAGRNVINSIDIQLGVITLIIAILGLTTAIVISRQIV  
GDFMASLKEQTF-QEARMSSAAAQARADRSGLMMLLVGAVALLAAVSAWVITRSIT  
EN-----INKLYFTEESRAGRNVISSIDILGVITLIIAILGLTTAIVISRQIV  
RQYRDAVKQLVNY-QDDAMDTSVEMADEVYNSRMIILLILALGAVFGALIAWVITRSVI  
SA-----SNTLLDHEMNNLHNEVTRTISEMLVIIVATVAVGVLISWRMTRQIT  
RQYRDAVKQLVNY-QDDAMDTSVEMADEVYSETRIILLILALGAVFGALIAWVITRSVT  
REYRNAVRRLVDY-QDNAMMSTVDAMSATYHDIRLVLAILGIGVVLVSWVWAMITRSVT  
SA-----SNTLLDHEMNNLHNEVTRTISEMLVIIVATVAVGVLISWRMTRQIT  
RQYRDAVKQLVNY-QDDAMDTSEEMADEVYSETRIILLILALGAVFGALIAWVITRSVT  
NGYLASVEALRDH-QRASIDQMGKINAGASRGDLILAVTGVLSAIGVLIWVLTTRSVI  
SLYFTKLNELTAL-QVSFVDHAKQVTKYIHDALLMMLLSVFSVTLGCLTAWLITRSVT  
EDHIKQITDIIISY-SNDMMKEGHDDIIKTYSKSLRLIISMVVLISLITGSLISWLTTRSLI  
TGYIASLQALKDH-QEARMQVAEQTSHDRTNALRLLAGAGAVLFLAGLSAWLITRSIT  
TLYFTKLNELTAL-QVSFVDHAKQVTKYIHDALLMMLLSVFSVTLGCLTAWLITRSVT  
DAVFNALNMVNW-QEKLTVETANQSLKNATNAGSLMVI IALLSVLGLISWITRTIK  
KRYKAKVAEFDY-QDDQMSAREAVQSQYSIDRIRLWLVVIVSIVAGGLIAWVITRSVT  
RNYRDSVKQLVNY-QDEAMTSTVETMADVYSSTRILLILVGLAAGALIAWVITRSVT  
KQGHALLSGLVAL-QVEVARDEYTSVQRYQWLKTLAIVLAVLAGGGAVFGWLMVGRVIV  
DSVFNALNMVNW-QEKLTVETADQSLKNANAGTLMVI IALLSVLGLISWITRTIK  
ES-----INQLYFTEETRAAQNISSSIDIRLAIITLVAIVLGLTAAVIVSRQIV  
ALLLNTNDYLYQ-SNVRAKESLNTAQDAYQQTRLIFIVISLVALSLAVILGGIITRSIF  
ALLLNTNDYLYQ-SNVRAKESLNTAQDAYQQTRLIFIVISLVALSLAVILGGIITRSIF  
RNYRDSVKQLVNY-QNDAMDNSTVETMADEVYNSRMIILLILALGAVFGALIAWVITRSVT  
NGYLASVEALRDH-QRASIDQMGQDINTGASRGDLILAVTGVLSAIGVLIWVLTTRSVI  
EAVFKALNDMWNW-QEKLTVETADQSLKNATHAGTLMVI IALLSVLGLISWITRTIK  
RKYRDSVKQLVNY-QDDAMTSTVEMADEVYNSRMIILLILALGAVFGALIAWVITRSVT  
NGYLTVSEALRDH-QRASIDQMGQDINAGASRGDLILAVTGVLSAIGVLIWVLTTRSVI  
GQLEALKEMTNI-QMEDSERVENTSQNVHRATTILMLTASLVAISIAAGFITRVLMI  
NGYLSVLLKAIQI-RMARANQLSEQAHQRTQLGMMFMFI GAFALALVLTMTFMVIRRVI  
DGYNDVLMKAIKI-RTDRANALTAQAHTRTQLGLMFMVGAFAFALVLTMTFMVIRRVTVI  
DAYNEVLLKAIKI-RTDRANALTEAHKRTQLGLMFMVGAFAFALVLTMTFMVIRRVTVI  
DDYNQVLLKALAS-RTARVEQLRSASRTHFSMLVMVAFAFVAVLVMVLTMTFMVIRRVI  
DDYNQVLLKALAS-RTERVEQLRSASRTHFSMLVMVAFAFVAVLVMVLTMTFMVIRRVI  
TAYNTVLLKAIEL-RTARANQLSDQAHQRSQGLMFMFI GAFALALVLTMTFMVIRRVTVI  
LANNVPLLAATAY-RTQTANTINDKAQRNAVLYGTLMMGGFFLLALVLTFTITVLMVRKVI  
DAYNAVLLKAIKI-RTNRADAINAEAAHQSRIGFIAMAVFAFALVLTMTFMVIRRVTVI  
DAYNAVLLKAIKI-RTQRADAINKQAEQTRLGFIIMMAAFALVLTMTFMVIRRVTVI  
LAYNKYLLEAVAY-RTQRAKELNETAHKNALLGYSLMGGSFALATILTLTFFLLRGLVLI  
NAYKAVLMEAIKL-RDVRSAQINDQAAEQSRIGFIAMGSAFVAALVLTMTFMVIRRVTVI  
DAYNAVLLKAIKI-RTDRANALTAQAHSRTQLGLMFMVGAFAFALVLTMTFMVIRRVTVI  
LANNVPLLAATAY-RTQTANTINDKAQRNAVLYGTLMMGGFFLLALVLTFTITVLMVRKVI  
DGYNEPLLKAVKY-RTEQANQINQSAHQEARLGYIIMAGAFVLLVLTMTFMVIRRVTVI  
DAYNEPLLKAVKY-RTERANEINQSAHQEARLGYIIMAGAFVLLVLTMTFMVIRRVTVI  
EAYNKPLLKAIKI-RTERAKALNSNAQYQAMMGYTLMAVSFAIATMTLTLTFFLRGLTI  
DDYNVLLKAIKI-RTDRASAITAEADRQSRIGFIAMAVFAFALVLTMTFMVIRRVTVI  
DRYNAVLLKVIQI-RTDRANHLTELSELRTRGLMFMMAAFVAVLVTITFTFMVIRRVTVI  
LAYNKFLLEAVAY-RTQRAKELNETAHKNALLGYSLMGGSFALATILTLTFFLLRGLTI  
LAYNKFLLEAVAY-RTQRAKELNETAQRNALLGYSLMGGSFALATILTLTFFLLRGLTI  
EAYNKPLLKAIKI-RTERAKALNSNAQYQAMMGYTLMAVSFAIATMTLTLTFFLRGLTI  
LAYNEVLLKVVAT-RTQRAEALNSAQQESVFGYSVMAASFAFVAVLVTFLYTLCLRRVTVI  
NAYTDILNKAVKI-RSTRANQLAEALHQRTQLGMMFMFI GAFVAVLVTMTFMVIRRVTVI  
EEFSPVRRKVKTE-LTKAAQDINQRAEQNALQGLYWMAGSFAVIMAIMYIMVNRVIL  
TAYNHVLLKAIKI-RTGRAKLLGEQAYQRTLRGLMFMFI GAFTLAVLVTMTFMVIRRVTVI  
AAYNHVLLKAIKI-RTERARLLSEQAYQRTLRGLMFMFI GAFTLAVLVTMTFMVIRRVTVI  
EAFSPVRRKVKTE-LTKAAQDINLQAEQNAKLGWMMAGSFAIS IMAIMYIMVNRVIL  
EAFSPVRRKVKTE-LTKAAQDINRAENATLGNWMMAGSFAIS IMAIMYIMVNRVIL  
TNYAVQVRKVKY-LTDHANNINAQAAGNARLGNIMGVSFILAIILAALTYLIRRAIL  
LAYNEVLLKVVAT-RTQRAEALNSAQQESVFGYSVMAASFAFVAVLVTFLYTLCLRRVTVI

Pr.mir.1265-PMI1666-YP 002151397.1--36H-COG1/1-568  
Di.dad.235-Dda3937\_02779-YP 003883640.1--36H-COG1/1-566  
Di.zea.1140-Dd1591\_1542-YP 003003875.1--36H-COG1/1-566  
Pe.atr.485-ECA1691-YP 049792.1--36H-COG1/1-561  
Se.pro.864-Spro 2983-Spro 001479212.1--36H-COG1/1-556  
Ph.asy.1114-PAU\_02685-YP 003041519.1--36H-COG1/1-564  
Pr.stu.1965-S70\_18135-YP 006218124.1--36H-COG1/1-561  
Mo.mor.2189-MU9\_1762-YP 007505181.1--36H-COG1/1-561  
Pe.car.1139-PC1\_2609-YP 003018175.1--36H-COG1/1-561  
Xe.nem.162-XNC1\_1620-YP 003711881.1--36H-COG1/1-567  
Pectob.2320-W5S\_1768-YP 006282731.1--36H-COG1/1-561  
Pa.vag.184-Pvag\_1723-YP 003931360.1--36H-COG1/1-558  
Ye.pes.133-YP23\_2024-YP 003568196.1--36H-COG1/1-557  
Ye.pse.585-YP2B2401-YP 070915.1--36H-COG1/1-557  
Ye.ent.378-YE2575-YP 001006778.1--36H-COG1/1-557  
Pa.ana.1905-PAJ\_1540-YP 005934416.1--36H-COG1/1-563  
Ph.lum.1262-plu1853-NP 929126.1--36H-COG1/1-564  
Serrat.1901-SerAS13\_3075-YP 006025914.1--36H-COG1/1-555  
Sa.ent.404-STY2128-NP 456485.1--36H-COG1/1-553  
Ra.aqu.1678-Q7S\_08960-YP 005401597.1--36H-COG1/1-564  
Se.mar.2260-D781\_2759-YP 007345195.1--36H-COG1/1-555  
Rahnel.1320-Rahaq\_1830-YP 004212575.1--36H-COG1/1-564  
Se.ply.1407-SerAS9\_3072-YP 004506452.1--36H-COG1/1-555  
Ed.ict.1187-NT01E1\_1461-YP 002932882.2--36H-COG1/1-555  
En.aer.1436-EAE\_15535-YP 004593297.1--36H-COG1/1-556  
Xe.bov.105-XBJ1\_1923-YP 003467827.1--36H-COG1/1-567  
Serrat.1408-SerAS12\_3073-YP 004501499.1--36H-COG1/1-555  
Er.bil.197-Ebc\_25350-YP 003741913.1--36H-COG1/1-559  
Er.tas.1011-ETA\_14650-YP 001907404.1--36H-COG1/1-554  
Sa.ent.407-STM4533-NP 463392.1--36H-COG1/1-553  
Es.col.1836-Y75\_p4240-YP 492486.1--36H-COG1/1-551  
En.bac.2261-D782\_3913-YP 003742002.1--36H-COG1/1-553  
Ci.kos.578-CKO\_03442-YP 001454958.1--36H-COG1/1-554  
Cr.sak.579-ESA\_03402-YP 001439456.1--36H-COG1/1-555  
Pantoe.297-Pat9b\_1606-YP 004115479.1--36H-COG1/1-558  
Cr.tur.6-CTU\_05670-YP 003208930.1--36H-COG1/1-555  
Sa.bon.1474-SBG\_3944-YP 004732724.1--36H-COG1/1-553  
En.asb.1498-Entas\_0547-YP 004827084.1--36H-COG1/1-554  
Ci.rod.62-ROD\_48461-YP 003368233.1--36H-COG1/1-554  
Ed.tar.1771-ETAF\_1249-YP 005698855.1--36H-COG1/1-529  
En.638.865-Ent638\_00153-YP 001175251.1--36H-COG1/1-586  
Ed.ict.1187-NT01E1\_1462-YP 002932883.1--36H-COG1/1-532  
Ye.ent.378-YE2573-YP 001006777.1--36H-COG1/1-545  
Ed.tar.1771-ETAF\_1250-YP 005698856.1--36H-COG1/1-530  
Mo.mor.2189-MU9\_1763-YP 007505182.1--36H-COG1/1-524  
En.aer.1436-EAE\_15540-YP 004593298.1--36H-COG1/1-536  
En.638.865-Ent638\_2456-YP 001177176.1--36H-COG1/1-533  
Se.pro.864-Spro 2982-YP 001479211.1--36H-COG1/1-541  
Es.col.1836-Y75\_p1861-YP 490147.1--36H-COG1/1-533  
Serrat.1901-SerAS13\_3074-YP 006025913.1--36H-COG1/1-541  
Ye.pes.133-YP23\_2023-YP 003568195.1--36H-COG1/1-536  
Serrat.1408-SerAS12\_3072-YP 004501498.1--36H-COG1/1-541  
Se.mar.2260-D781\_2758-YP 007345194.1--36H-COG1/1-534  
Ye.pse.585-YP2B2400-YP 070915.1--36H-COG1/1-536  
Se.ply.1407-SerAS9\_3071-YP 004506451.1--36H-COG1/1-541  
Pr.stu.1965-S70\_18140-YP 006218125.1--36H-COG1/1-521  
En.bac.2261-D782\_1749-YP 007339930.1--36H-COG1/1-533  
En.asb.1498-Entas\_2590-YP 004829104.1--36H-COG1/1-533  
En.asb.1498-Entas\_3672-YP 004830170.1--36H-COG1/1-545  
Ci.kos.578-CKO\_01067-YP 001452646.1--36H-COG1/1-537  
En.clo.1544-3cW5U1\_02810-YP 004952663.1--36H-COG1/1-538  
Sa.ent.407-STM3152-NP 462067.1--36H-COG1/1-547  
Pe.atr.485-ECA1332-YP 049438.1--36H-COG1/1-555  
Pe.car.1139-PC1\_1208-YP 003016792.1--36H-COG1/1-555  
En.638.865-Ent638\_3407-YP 001178118.1--36H-COG1/1-545  
Pa.vag.184-Pvag\_1413-YP 003931052.1--36H-COG1/1-554  
Ph.asy.1114-PAU\_02684-YP 003041518.1--36H-COG1/1-544  
Pa.ana.1905-PAJ\_1316-YP 005934192.1--36H-COG1/1-556  
Ci.kos.578-CKO\_04394-YP 001455885.1--36H-COG1/1-561  
Sa.bon.1474-SBG\_2750-YP 004731563.1--36H-COG1/1-547  
Ra.aqu.1678-Q7S\_16025-YP 005402985.1--36H-COG1/1-554  
Rahnel.1320-Rahaq\_3177-YP 004213898.1--36H-COG1/1-554  
Pectob.2320-W5S\_3114-YP 006284066.1--36H-COG1/1-555  
Ye.ent.378-YE2971-YP 001007160.1--36H-COG1/1-552  
Er.bil.197-Ebc\_20190-YP 003741400.1--36H-COG1/1-556  
Ph.lum.1262-plu1854-NP 929127.1--36H-COG1/1-544  
Er.bil.197-Ebc\_25340-YP 003741912.1--36H-COG1/1-528  
Di.zea.1140-Dd1591\_2937-YP 003005238.1--36H-COG1/1-564  
Er.tas.1011-ETA\_14670-YP 001907406.1--36H-COG1/1-518  
Sa.ent.404-STY4234-NP 458344.1--36H-COG1/1-547  
Sa.ent.407-STM3577-NP 462478.1--36H-COG1/1-547  
Sa.bon.1474-SBG\_3170-YP 004731982.1--36H-COG1/1-547  
En.asb.1498-Entas\_2591-YP 004829105.1--36H-COG1/1-555  
En.638.865-Ent638\_1858-YP 001176586.1--36H-COG1/1-552  
Ci.rod.62-ROD\_19331-YP 003365490.1--36H-COG1/1-553  
Di.dad.235-Dda3937\_01559-YP 003882087.1--36H-COG1/1-566  
Er.bil.197-Ebc\_37780-YP 004743156.1--36H-COG1/1-553  
Pantoe.297-Pat9b\_2001-YP 003115872.1--36H-COG1/1-558

RPL----KSLLENIKAFSEGDL--RPDIEV--HGRNEMSLASGLKHMQDELHITVGRVY  
QPL----TNLIEHIRHMAKGDLD--TTRIDF--HGTNEMGLADSLRHMQTEFFVTVSVA  
QPL----HNLIEHIRHMAKGDLD--STRIDF--HGTNEMGLADSLRHMQTEFFVTVSVA  
RPL----NSVIEHIRHIAKGDLD--TKTDF--HSSNEMGLADSLRHMQSEFVTVSVA  
RPL----NRMIEHIKMAAGDLD--TQP IAV--TSRNEMGLAASLKHMQDELINTVSGVR  
NPL----NKLENIKALSTGDL--TQNI AI--SGRNEMSLAVGLKHMQKFEINTVSSVR  
EPL----RALIQRITFAAGDLD--TPSVD T--KATNEIGELARGVEHMQDELINTVGRV  
HPL----NGLVDRIKIFAAGDLD--TPTVAV--NGKNEIADLGRGVQHMQDELINTVGRV  
RPL----NNVIEHIRHIAKGDLD--TKTTHF--HSSNEMGLADSLRHMQSEFVTVSVA  
NPL----HKLNNIKAFSEGDL--TQITV--SGNEMGLAASLKHMQDELINTVSGVR  
RPL----NNVIEHIRHIAKGDLD--TKTTFN--HSSNEMGLADSLRHMQSEFVTVSVA  
RPL----RQSEIHIQHIARGDLD--TQPVEI--TVRNEIGELTSLQHMQDELARTVTVR  
HPL----NHLIAHIKHIANGDLD--TQNI EV--HGRNEVGTLAASLKHMQDELINTVGEVR  
NPL----NHLIAHIKHIANGDLD--TQNI EV--HGRNEVGTLAASLKHMQDELINTVGEVR  
HPL----KHLIEHIKHIANGDLD--TQNI EV--HSRNEIGTLAASLKHMQDELINTVSDVR  
RPL----KESIEHIQHIAGDLD--TQPI NI--SVRNEIGDLDLTSLQDMQSLRVTSTVR  
NPL----NKLENIKALSTGDL--TQNVTV--SGRNEMSTLAVGLKHMQKFEITVSSVR  
RPL----NRMIEHIKMAAGDLD--TQP IAV--TSRNEMGLAASLKHMQDELINTVSGVR  
NPL----ARVITHIRIEIASGDLD--TKLTV--SGRNEIGELAGTVEHMQSLDITVQVC  
HPL----KNIVDTIRKIATGDL--THEIVV--KSRNEIGQLADSLKYMQDELINTVSDVR  
RPL----NRIIEHIKHIAGDLD--TQSIDV--SSRNEMGLAASLQHMQDELINTVSGVR  
HPL----KNIVDTIRKIATGDL--THEIVV--KSRNEIGQLADSLKYMQDELINTVSGVR  
RPL----NRMIEHIKMAAGDLD--TQP IAV--TSRNEMGLAASLKHMQDELINTVSGVR  
RPL----NSLMGNIRQFAVGDL--SGRI EV--RGSNEMGLADSLRHMQSEFIRTVDVSR  
RPL----NRMIEHIKRIASGDLD--TQPI PV--TSRNEIGVLAASLKHMQDELINTVSGVR  
NPL----NKLENIKAFSEGDL--TQITV--SGTNEMLAVGLKHMQDELINTVSGVR  
RPL----NRMIEHIKMAAGDLD--TQP IAV--TSRNEMGLAASLKHMQDELINTVSGVR  
RPL----RNMIEHIRHIASGDLD--TQSI ES--EGRNEMGTLADSLRHMQSESLVTVSDVR  
RPL----QTSIDHIRRIASGDLD--TGKITV--EGQNEMSSLAASLQHMQDELINTVSAVR  
APM----NRLIESIRHIASGDLD--VKRIDV--EGSNEMGLAENLRHMQSELMRTVGDVR  
APM----NRLIDSIRHIASGDLD--VKPI EV--DGSNEMGLAASLKHMQDELINTVSGVR  
LPL----QSLIESIRHIASGDLD--VRRIDV--EGRNEMGLAASLKHMQDELINTVSGVR  
APM----NRLIESIRHIASGDLD--VKRIDV--EGSNEMGLAQSLRHMQDELINTVSDVR  
TPL----NRIIESIRHIASGDLD--ARQIDV--DGTNEMGLAASLKHMQDELINTVGEVR  
RPL----QOSIEHIRHIAKGDLD--TQQVEV--NVRNEMGLDLSLQHMQDELARTVTVR  
APL----NRLIDSIRHIASGDLD--AREIEV--DGTNEMGLAASLKHMQDELINTVSGVR  
APM----NRLIESIRHIASGDLD--VKRIDV--EGSNEMGLADNLRHMQSELMRTVGDVR  
APL----NRLIDSIRHIASGDLD--VKRIDV--EGTNEMLADLTLRHMQDELINTVSDVR  
APL----NRLIDSIRHIASGDLD--VKRI EV--EGSNEMGLASLIRHMQDELINTVSDVR  
RPL----NSLMGNIRQFAAGDLD--SGRI EV--CGSNEMGLADSLRHMQSEFIRTVDVSR  
SPL----NRLIDSIRHIASGDLD--VKRIDV--EGTNEMLADLTLRHMQDELINTVSDVR  
APL----TLMRSHFERIARGDLD--SAEIKV--DGRNEISQLYASLRSMQDLAGTVLSVR  
SPL----KTRMRFHFDRIAGDLD--SAQISV--TGRNEISQMFASLRTMQQSLITVSHVR  
APL----TVMRSHFERIARGDLD--SAEIKV--YGRNEISQLYASLRSMQDLAGTVLSVR  
NPL----TSMSEHFQVQAGKLD--NOKIEV--TTRDEIGVFPQSLRHMQSESLVTVSDVR  
QPL----NIRGFHFERIASGDLD--SAPIEV--YGRNEISQLYASLRSMQDLAGTVLSVR  
LPL----AI ISSHFDSIAKGNLD--ARPVSV--YGKNEISAFASLKAMQGLRETVTDVR  
RPL----NIMRSHFDRIAGDLD--ATPI QV--YGRNEISQLYASLRSMQDLAGTVLSVR  
QPL----AI IGSHFDSIAAGNLD--ARPI AV--YGRNEITAFASLKAMQGLRETVTDVR  
QPL----NIMRSHFDRIAGDLD--ATPI QV--YGRNEISQLYASLRSMQDLAGTVLSVR  
RPL----ATMREHFGRIAQDLD--SGQISV--TGRNEISQMFASLRTMQQSLISTVSNVR  
QPL----NIMRSHFDRIAGDLD--ATPI QV--YGRNEISQMFASLRTMQQSLITVSGVR  
GPL----KSMRSHFERIAGDLD--ATPVVV--TGNNEISALFAGLRMQQSLITVSGVQ  
RPL----ATMREHFGRIAQDLD--SGQISV--TGRNEISQMFASLRTMQQSLITVSGVR  
QPL----NIMRSHFDRIAGDLD--ATPI QV--YGRNEISQLYASLRSMQDLAGTVLSVR  
YPL----MSMSDHFMKLAGKLD--NQDIRV--TTRDEIGVEFQKLMQSESLATVSNLR  
SPL----KIVSDHFDSIAKGNLD--ARPI AV--YGRNEISAFASLKAMQGLRETVTDVR  
QPL----AI ISSHFDSIAKGNLD--ARPVAV--YGKNEISAFASLKAMQGLRETVTDVR  
KPL----DRIRQFQRIAGDLD--SHP IEP--FGRNCVGRVPLLSAMQDLSREAVSTIR  
QPL----AI IGSHFDSIADGNLD--ARPI AV--YGRNEISAFASLKAMQGLRETVTDVR  
QPL----AI VTSHFDSIAKGNLD--ARPVAV--YGKNEISAFASLKAMQGLRETVTDVR  
KPL----ERIRQFQRIAGDLD--SQPI EA--LGRNCVGRVPLLSAMQDLSREAVSTIR  
RPL----NDLRYHFSVIAAGNLD--GKPI LD--FGNRCVGRVPLLSAMQDLSREAVSTIR  
RPL----NDLRYHFSVIAAGNLD--GKPI LD--FGNRCVGRVPLLSAMQDLSREAVSTIR  
KPL----GRIREHFQRIAGDLD--SQSVEP--FGRNCVGRVPLLSAMQDLSREAVSSIR  
RPL----ESIRTHFAVIATGDL--SQPVAD--FGRNCVGRVPLLSAMQDLSREAVSSIR  
RPF----ANMRSHFQHVAEKGLD--NKEVAV--FTNDEIGEVFLKRLMQDLSVNSTILIK  
KPL----EKIREHFVIAKGNLD--SKPVED--MGRNCVGRVPLLSAMQDLSREAVSSIR  
KPL----ARIRQFQRIAGDLD--SQPI EE--FGRNCVGRVPLLSAMQDLSREAVSSIR  
RPL----DRIRQFQRIAGDLD--SQPI EA--LGRNCVGRVPLLSAMQDLSREAVSTIR  
KPL----DKIRGFHFAVIASGDLD--TFYLEE--FGKNCAGKLDPLLNEMQDLSVNTVQITR  
KPL----DKIRGFHFAVIASGDLD--TFYLEE--FGKNCAGKLDPLLNEMQDLSVNTVQITR  
RPL----NDLRYHFSVIAAGNLD--GKPI LD--FGNRCVGRVPLLSAMQDLSREAVSTIR  
RPL----DDIRAHFRVIAAGDLD--GQPI TD--FGRNCVGRVPLLSAMQDLSREAVSTIR  
RPL----DGMREHFRLIADGDL--SHPLED--LGRNCVGRVPLLSAMQDLSREAVSSIR  
RPF----ANMRSHFQHVAEKGLD--NKEVSV--FTQDEIGEVFLKRLMQDLSVNSTILIK  
APL----SRMRSHFERIASGNLD--GGTI ET--EGRNELSOLFISLNAMQDLSREAVSSIR  
RPL----NDLRDHFLVIAAGNLD--GKPI LD--FGNRCVGRVPLLSAMQDLSREAVSTIR  
RPL----ARMRSHFERISHGDL--NGQIEK--WGSNELQGLTSLQHMQDELARTVSDVR  
APL----QRIMAHIQTIADGDL--THEIEA--EGRSEMGLAAGLKTMQQSLIRTVDVSR  
RPL----QRIMAHIQTIADGDL--THEIEA--EGRSEMGLAAGLKTMQQSLIRTVDVSR  
RPL----QRIMAHIQTIADGDL--TRVIEA--EGRSEMGLAAGLKTMQQSLIRTVDVSR  
NPL----GRVIAHIREIASGDLD--TKLTV--SGRNEITELANSVHMQRSLDITVTVNR  
RPL----RSVMNHIRTIASGDLD--THTISI--DSRNEMGLAAGLHMQDLSVNTVSAVR  
NPL----GRVIAHIREIASGNLD--TNTLTV--AGRNEIGELASTVHMQRSLVTVSAVR  
RPL----NDLRDHFLVIAAGNLD--GKPI LD--FGNRCVGRVPLLSAMQDLSREAVSTIR  
TPL----KQVLAHIQRIAGDLD--SETLVV--EGRSEMGLASLNTAMQDLSIVTVGHR  
KPL----DRIRDHFAVIAGDLD--SQPVQE--FGRNCVGRVPLLSAMQDLSREAVSSIR



En.clo.1544-EcWSU1\_01962-YP\_004951821.1--36H-COG1/1-553  
En.asb.1498-Entas 1879-YP\_004828403.1--36H-COG1/1-554  
En.bac.2261-D782\_1748-YP\_007339929.1--36H-COG1/1-547  
Es.col.1836-Y75\_p1862-YP\_490148.1--36H-COG1/1-553  
Cr.tur.6-CTU\_33010-YP\_003211664.1--36H-COG1/1-555  
Cr.tur.6-CTU\_25780-YP\_003210941.1--36H-COG1/1-536  
En.clo.1544-EcWSU1\_00403-YP\_004950264.1--36H-COG1/1-549  
En.638.865-Ent638\_2457-YP\_001177177.1--36H-COG1/1-555  
Sa.bon.1474-SBG\_1755-YP\_004730609.1--36H-COG1/1-553  
Pr.mir.1265-PMI1665-YP\_002151396.1--36H-COG1/1-548  
Cr.sak.579-ESA\_01348-YP\_001437444.1--36H-COG1/1-556  
Cr.sak.579-ESA\_00560-YP\_001436686.1--36H-COG1/1-555  
Sa.ent.407-STM1919-NP\_460876.1--36H-COG1/1-553  
Ci.kos.578-CKO\_01066-YP\_001452645.1--36H-COG1/1-552  
En.asb.1498-Entas 0424-YP\_004826963.1--36H-COG1/1-549  
Pantoe.297-Pat9b\_1273-YP\_004115150.1--36H-COG1/1-553  
Ed.tar.1771-ETAF\_2264-YP\_005699859.1--36H-COG1/1-555  
Pa.ana.1905-PAJ\_3534-YP\_005936409.1--36H-COG1/1-553  
Pa.vag.184-Pvag\_1203-YP\_003930842.1--36H-COG1/1-552  
Pantoe.297-Pat9b\_1605-YP\_004115478.1--36H-COG1/1-556  
Cr.sak.579-ESA\_00210-YP\_001436348.1--36H-COG1/1-557  
Er.tas.1011-ETA\_pET460340-YP\_001905943.1--36H-COG1/1-543  
Cr.tur.6-CTU\_36610-YP\_003212024.1--36H-COG1/1-557  
Pe.car.1139-PC1\_1159-YP\_003016743.1--36H-COG1/1-556  
Er.tas.1011-ETA\_14640-YP\_001907403.1--36H-COG1/1-554  
Pa.vag.184-Pvag\_1725-YP\_003931362.1--36H-COG1/1-556  
Ed.ict.1187-NT01EI\_3742-YP\_002935104.1--36H-COG1/1-525  
En.638.865-Ent638\_0380-YP\_001175119.1--36H-COG1/1-549  
Er.bil.197-Ebc\_25360-YP\_003741914.1--36H-COG1/1-556  
Er.tas.1011-ETA\_16910-YP\_001907630.1--36H-COG1/1-543  
Es.fer.1173-EFER\_3055-YP\_002384154.1--36H-COG1/1-603  
Xe.nem.162-XNC1\_1619-YP\_003711880.1--36H-COG1/1-520  
En.clo.1544-EcWSU1\_02811-YP\_004952664.1--36H-COG1/1-559  
Di.dad.235-Dda3937\_03500-YP\_003882750.1--36H-COG1/1-553  
Es.bov.105-XBJ1\_1924-YP\_003467828.1--36H-COG1/1-523  
Rahnel.1320-Rahaq\_1831-YP\_004212576.1--36H-COG1/1-556  
Ra.aqu.1678-Q7S\_08965-YP\_005401598.1--36H-COG1/1-556  
Cr.sak.579-ESA\_01126-YP\_001437230.1--36H-COG1/1-514  
Pe.atr.485-ECA2712-YP\_050803.1--36H-COG1/1-560  
En.clo.1544-EcWSU1\_00560-YP\_004950421.1--36H-COG1/1-597  
Di.dad.235-Dda3937\_03498-YP\_003882752.1--36H-COG1/1-561  
Cr.tur.6-CTU\_27880-YP\_003211151.1--36H-COG1/1-514  
Pe.car.1139-PC1\_1669-YP\_003017246.1--36H-COG1/1-560  
Ra.aqu.1678-Q7S\_14450-YP\_005402672.1--36H-COG1/1-551  
Ci.kos.578-CKO\_03622-YP\_001455137.1--36H-COG1/1-517  
Di.zea.1140-Dd1591\_2408-YP\_003004728.1--36H-COG1/1-557  
Di.zea.1140-Dd1591\_2406-YP\_003004726.1--36H-COG1/1-559  
Ed.ict.1187-NT01EI\_2801-YP\_002934203.1--36H-COG1/1-554  
Pe.car.1139-PC1\_1384-YP\_003016966.1--36H-COG1/1-559  
Rahnel.1320-Rahaq\_2866-YP\_004213595.1--36H-COG1/1-551  
Pe.atr.485-ECA1281-YP\_049387.1--36H-COG1/1-556  
Pectob.2320-W5S\_1886-YP\_006282848.1--36H-COG1/1-549  
Pectob.2320-W5S\_1696-YP\_006282659.1--36H-COG1/1-559  
Di.zea.1140-Dd1591\_2407-YP\_003004727.1--36H-COG1/1-555  
Pe.atr.485-ECA1509-YP\_049611.1--36H-COG1/1-559  
Pa.vag.184-Pvag\_1724-YP\_003931361.1--36H-COG1/1-520  
Pa.ana.1905-PAJ\_1541-YP\_005934417.1--36H-COG1/1-520  
Mo.mor.2189-MU9\_1596-YP\_007505015.1--36H-COG1/1-519  
Pr.mir.1265-PMI2808-YP\_002152509.1--36H-COG1/1-563  
Di.zea.1140-Dd1591\_0395-YP\_003002764.1--36H-COG1/1-556  
En.clo.1544-EcWSU1\_03786-YP\_004953635.1--36H-COG1/1-515  
Pectob.2320-W5S\_3170-YP\_006284116.1--36H-COG1/1-556  
Di.dad.235-Dda3937\_02184-YP\_003884754.1--36H-COG1/1-556  
Ci.rod.62-ROD\_32641-YP\_003366748.1--36H-COG1/1-517  
Di.dad.235-Dda3937\_03499-YP\_003882751.1--36H-COG1/1-561  
Di.dad.235-Dda3937\_00105-YP\_003883346.1--36H-COG1/1-561  
Pantoe.297-Pat9b\_1604-YP\_004115477.1--36H-COG1/1-555  
Er.tas.1011-ETA\_14660-YP\_001907405.1--36H-COG1/1-560  
Pr.mir.1265-PMI2809-YP\_002152510.1--36H-COG1/1-575  
Ed.tar.1771-ETAF\_3053-YP\_005700648.1--36H-COG1/1-516  
Se.pro.864-Spro\_1415-YP\_001477647.1--36H-COG1/1-546  
Di.zea.1140-Dd1591\_1804-YP\_003004134.1--36H-COG1/1-562  
Di.dad.235-Dda3937\_03501-YP\_003882749.1--36H-COG1/1-575  
Pantoe.297-Pat9b\_0851-YP\_004114731.1--36H-COG2/1-524  
Pa.vag.184-Pvag\_0291-YP\_003929953.1--36H-COG2/1-525  
En.clo.1544-EcWSU1\_03886-YP\_004953735.1--36H-COG2/1-519  
Cr.tur.6-CTU\_04790-YP\_003208842.1--36H-COG2/1-515  
Ci.kos.578-CKO\_04484-YP\_001455975.1--36H-COG2/1-521  
Cr.sak.579-ESA\_03488-YP\_001439539.1--36H-COG2/1-515  
Ci.rod.62-ROD\_48071-YP\_003368199.1--36H-COG2/1-521  
Sa.bon.1474-SBG\_2851-YP\_004731664.1--36H-COG2/1-521  
Sa.ent.407-STM3216-NP\_462130.1--36H-COG2/1-521  
En.asb.1498-Entas 3753-YP\_004830248.1--36H-COG2/1-519  
Mo.mor.2189-MU9\_3389-YP\_007506806.1--36H-COG2/1-521  
Sa.ent.404-STY3394-NP\_457606.1--36H-COG2/1-522  
En.638.865-Ent638\_3526-YP\_001178235.1--36H-COG2/1-519  
Pe.atr.485-ECA1774-YP\_049874.1--36H-COG2/1-554  
En.638.865-Ent638\_2119-YP\_001176845.1--36H-COG2/1-549

KPL----HMIMNHIRIAGGDL--TQDIAL--SGRNEMQOLAAGLHEMQQSLVTVSAVR  
KPL----KIMNHIRIAGGDL--THNITI--SGRNEMQOLAAGLHEMQQSLVTVSAVR  
TPL----NHVMTIRHIANGDL--TPALSL--KGRNELTQLADTVNHMHQALIDTVTRVR  
TPL----AKIIAHIREIAGGDL--ANTLTI--DGRSEMGLAQSVSHMQRSLLDVTVTHR  
GPL----REAMEHIRIAGGDL--TRQIIV--EGRNEMQOLAASLQEMQQLAGTVAVR  
TPL----ASVHIREIAGGDL--TETITV--SGRNEITELASVQHMQQALIQTVSSVR  
LPL----QDVIGHIRIAGGDL--TQPIQA--EGKNEMAILARNVQEMQTSLVTVGVVR  
NPL----GNVIGHIREIAGGDL--TKKTLT--SGRNEITELASSVDHMQRSLDVTVANVR  
TPL----GRVIAHIREIAGGDL--TKTLTV--SGRNEIGELAGTVDMQRSLIETVTQVR  
KPF----ASLSRYFNDVATGK--NREILV--FTDDEIGDFIRRLRMRGELASIRIVR  
KPL----AGVHIREIAGGDL--TETITV--TGRNEMTELASVQHMQQALIQTVSTVR  
GPL----REAMEHIRIAGGDL--TRQIIV--EGRNEMQOLAASLLAMQQLAGTVAVR  
NPL----ARVITHIREIAGGDL--TKTLTV--SGRNEIGELAGTVDMQRSLIETVTQVR  
LPL----ARVIAHIREIAGGDL--TNTLTV--SGRNEIGELAGTVDMQRSLIETVTQVR  
RPL----QDVIGHIRIAGGDL--TQPVEA--SGKNEMALLAHNVQEMQQLANTVTVR  
IPM----KQLQKQMERFAEGDL--SGSLHV--EGRSEMAAALASLNHMQQALLSTVNVVR  
ARI----QOVYATQAEIAGGDL--AIDIQA--RGDNEVSQLMQGLRHRMRELAHMVGAVR  
KPL----SMATDYMRAISAGDL--TQEIAS--ESQNETGRLLRQLEEMRSALVTVTSVD  
NPL----ARLTAHMRAISAGDL--TSAIQH--EGRNEMQOLAQELQQRDRALVTVTSVD  
QPL----QQLLAHIRIAGGDL--TQTIQV--EGRNEMQOLAAGLLEMQQLVTVTSVVR  
LPL----HDVMGHIRIAGGDL--TQPIQA--QGHNEMALLARNVHEMQQSLRVTSTVR  
RPL----NNLRHFRILITEGDL--THTLRD--LSRNCVGRVPLVPMVREMQSLREAVSSIR  
LPL----HVISHIRIAGGDL--TQPIQA--QGHNEMALLARNVHEMQQSLRVTSTVR  
HPL----RTLQHSIAIAGGDL--THPIDT--TGRNEMQOLAAGLHMQQSLRVTSTVR  
RPL----QATIGHISRIAGGDL--TQNVVE--KGRNEMQOLAAGSLVKNMQEALVTVSVVR  
TPL----NGSINHIHQIAGGDL--TQPIQA--EGRNEMQOLAAGLHEMQQSLVTVTVNR  
RPL----AQLHAHLRLTAGDL--SATLA--GGRNELGSLASISEMQQALISIVGQVR  
KPL----DEVISHIRIAGGDL--TRPIDA--HGKNEMAVLGRNVQEMQQLANTVTVR  
TPL----QNNIAHISHIAGGDL--THTIEV--EGRNEMQOLAASLLEMQQSLVTVSDVR  
RPL----NNLRHFRILITEGDL--THPLHD--LNRNCVGRVPLVPMVREMQSLREAVSSIR  
EPM----NRLVDSIRIAGGDL--VKPIDV--DGDNEVSQLMQGLRHRMRELAHMVGAVR  
KPF----ENMTRCFQDVAEGR--DKEVAV--TTDDEIGDFIRKLDRMQQSLIKSISAVR  
NPL----GRVIAHIREIAGGDL--TKTLTV--SGRNEITELASVQHMQQALIQTVSTVR  
KPI----GQIKRHLLELLTSGK--GVELDE--FGRNEMQOLAASLLEMQQSLVTVSDVR  
RPF----DNMTRCFQDVAEGR--NKEIIV--TTDDEIGDFIRKLDRMQQSLIKSISAVR  
TPL----TIMRGHFDRIGAGDL--SSPIVA--EGRYEIKVMLESQQMQLSLRVTSTVR  
TPL----TIMRGHFDRIGAGDL--SSPIVA--EGRYEIKVMLESQQMQLSLRVTSTVR  
KPL----EKIRNHFTLIAGGDL--SQPVPE--FGRNEMQOLAASLLEMQQSLVTVSDVR  
RPL----NMIKGYFQVLAAGQL--GHPLDE--FGRNEMQOLAASLLEMQQSLVTVSDVR  
NPL----TRLLDNIRIAGGDL--VKRIVE--QGANEMGELADSLRHMQQLVTVSDVR  
NPI----AVIKKHLGLIAGDL--DQHLAE--FGRNEMQOLAASLLEMQQSLVTVSDVR  
KPL----EKIRNHFTLIAGGDL--SQPVPE--FGRNEMQOLAASLLEMQQSLVTVSDVR  
RPL----NMIKGYFQVLAAGQL--NHPIDE--FGRNEMQOLAASLLEMQQSLVTVSDVR  
KPL----NKVKHLESLATGIL--DSKIAF--QGANEMGELADSLRHMQQLVTVSDVR  
KPL----HDVMGHIRIAGGDL--TRNIHT--EGSNEMALLAHNVQEMQQLANTVTVR  
KPI----GQIKRHLLELLTSGK--GVELEE--FGRNEMQOLAASLLEMQQSLVTVSDVR  
SPI----SAIQAHKGLIAGDL--DQHLDE--FGRNEMQOLAASLLEMQQSLVTVSDVR  
ARI----QKVYATQAEIAGGDL--AIDIQT--HGDNEISQLMQGLRHRMRELAHMVGAVR  
IPI----SVLKSHLQTLTAGDL--GCELAE--FGRNEMQOLAASLLEMQQSLVTVSDVR  
KPL----NKVKHLESLATGIL--DSKIAF--QGANEMGELADSLRHMQQLVTVSDVR  
HPL----RTLQHSIAIAGGDL--THPIDT--AGRNEMQOLAASLLEMQQSLVTVSDVR  
KPL----NMIKGYFQVLAAGQL--GHPLDE--FGRNEMQOLAASLLEMQQSLVTVSDVR  
IPI----SVLKSHLQTLTAGDL--GCELVE--FGRNEMQOLAASLLEMQQSLVTVSDVR  
KPI----GQIKRHLLELLTSGK--GVELEE--FGRNEMQOLAASLLEMQQSLVTVSDVR  
IPI----AVLKSHLQTLTAGDL--GCELAE--FGRNEMQOLAASLLEMQQSLVTVSDVR  
QPL----QQLLAIRIAGGDL--TQPIV--EGRNEMQOLAASLLEMQQSLVTVSDVR  
RPL----QRLVDIRIAGGDL--TQPIV--EGRNEMQOLAASLLEMQQSLVTVSDVR  
RPL----NNVRQHFRIAGGDL--SQPVPE--FGRNEMQOLAASLLEMQQSLVTVSDVR  
NPL----NQMEYQEAIAAGDL--ISRIDHIT--GRNEIDQLMLGQLMRRLKEMVSAIR  
RPL----EQVKAHLQILSNQDL--DTSVDE--MGRNEVQQLIPFVHTMQNNWIKVTAIEIR  
KPL----ARIRQFRQIAGGDL--SQPIEP--FGRNEMQOLAASLLEMQQSLVTVSDVR  
HPL----RTLQHSIAIAGGDL--TLHIDA--SGRNEMQOLAASLLEMQQSLVTVSDVR  
RPL----EKVKAHLQILSNQDL--DSTIGE--MGRNEIGQLIPFVHTMQNNWIKVTAIEIR  
KPL----HEVMDHIRIAGGDL--THVIPA--DGSNEMALLARNVHEMQQSLVTVSDVR  
KPI----GQIKRHLLELLTSGK--GVELDE--FGRNEMQOLAASLLEMQQSLVTVSDVR  
NPL----NRITLHHISTGDL--TQSLHI--QAKNEIGQLADSLRHMQQLVTVSDVR  
NPL----NSNIRHIHQIAGGDL--TQTIQA--EGRNEMQOLAASLLEMQQSLVTVSDVR  
RPL----KQNIHIRIAGGDL--TQAIQA--QGHNEMQOLAASLLEMQQSLVTVSDVR  
LRI----KQVIDYMSDISQGNLLENSTKA--KGNNEIDQLINGIYMRSELSLIVNAIR  
RPL----AQLHAHLRLTAGDL--SATLA--GGRNELGSLASISEMQQALISIVGQVR  
NKI----NQIIDYQAEISNRNL--DIEINA--GGRNEIGQLRNLNGLNMLRNLANTVCTVR  
QPL----NQVMVHLHHIATGDL--TQSLTI--EAKNEIGQLRNLNGLNMLRNLANTVCTVR  
KPI----GQIKRHLLELLTSGK--GVELDE--FGRNEMQOLAASLLEMQQSLVTVSDVR  
RPL----NEAVEIAGVAAAGDL--STHIEV--KSTDETVGLMRALQSMNNDLITVTVDR  
RPL----VAADVFAEIAAGDL--STQMQV--TSRDETVGLMRALQSMNNDLITVTVDR  
RPL----GAADVFAEIAAGDL--TGSITP--HGKDETVGLLHALMEMKTRLLDIVQEQV  
RPL----DQAVRFAGIAAGDL--TRSEV--QARDETVGLLHALMEMKTRLLDIVQEQV  
RPL----NDAVQFAGIAAGDL--TRTHI--AQKDETVGLLHALMEMKTRLLDIVQEQV  
RPL----DQAVRFAGIAAGDL--TRSDV--QSRDETVGLLHALMEMKTRLLDIVQEQV  
RPL----EAVRFAGIAAGDL--TRSIAT--QDRDETVGLLHALMEMKTRLLDIVQEQV  
QPL----DEAVRFAGIAAGDL--TRHITT--NDKDETVGLLHALMEMKTRLLDIVQEQV  
RPL----DEAVRFAGIAAGDL--TRHITT--DYKDETVGLLHALMEMKTRLLDIVQEQV  
RPL----GTAVFAEIAAGDL--TRTIAS--HGKDETVGLLHALMEMKTRLLDIVQEQV  
RPL----DKAVTLARAIAAGDL--TQQVNV--THHDETVGLLHALMEMKTRLLDIVQEQV  
RPL----DDAVRFAGIAAGDL--TRHITT--DYKDETVGLLHALMEMKTRLLDIVQEQV  
RPL----GAVFAEIAAGDL--TRNITT--RSKDETVGLLHALMEMKTRLLDIVQEQV  
QPI----REALVGAEKVAGDL--TSEIYT--DRTDETVGLLHALMEMKTRLLDIVQEQV  
RPL----KEAVTVASRAAAGDL--TTDVKV--HSTDELQQLSALKNMMSVLSQVLR

Pectob.2320-W5S\_2813-YP\_006283770.1--36H-COG2/1-554  
Di.zea.1140-Dd1591\_0695-YP\_003003055.1--36H-COG2/1-561  
Pa.vag.184-Pvag\_pPag30079-YP\_003729820.1--36H-COG2/1-546  
Er.bill.197-Ebc\_38940-YP\_003743272.1--36H-COG2/1-526  
Ra.aqu.1678-Q7S\_24891-YP\_005419232.1--36H-COG2/1-554  
En.asb.1498-Entas\_2287-YP\_004828805.1--36H-COG2/1-513  
Rahnel.1320-Rahaq\_4869-YP\_004215574.1--36H-COG2/1-554  
Di.dad.235-Dda3937\_00027-YP\_003883574.1--36H-COG2/1-554  
Pr.stu.1965-S70\_05790-YP\_006215722.1--36H-COG2/1-520  
En.638.865-Ent638\_2100-YP\_001176826.1--36H-COG2/1-512  
Pe.car.1139-PC1\_2526-YP\_003018093.1--36H-COG2/1-554  
Mo.mor.2189-MU9\_702-YP\_007504121.1--36H-COG2/1-525  
Pe.car.1139-PC1\_3443-YP\_003018995.1--36H-COG2/1-511  
Pa.ana.1905-PAJ\_0915-YP\_005933791.1--36H-COG2/1-559  
Pectob.2320-W5S\_3736-YP\_006284671.1--36H-COG2/1-510  
Pe.atr.485-ECA0183-YP\_048310.1--36H-COG2/1-553  
Rahnel.1320-Rahaq\_3107-YP\_004213828.1--36H-COG2/1-503  
Pe.car.1139-PC1\_4071-YP\_003019622.1--36H-COG2/1-553  
Di.dad.235-Dda3937\_03462-YP\_003884507.1--36H-COG2/1-563  
Ra.aqu.1678-Q7S\_15665-YP\_005402913.1--36H-COG2/1-503  
Pectob.2320-W5S\_4505-YP\_006285423.1--36H-COG2/1-555  
Pe.atr.485-ECA3642-YP\_051730.1--36H-COG2/1-551  
Pe.car.1139-PC1\_1417-YP\_003019699.1--36H-COG2/1-554  
En.asb.1498-Entas\_4509-YP\_004821569.1--36H-COG2/1-559  
Pa.ana.1905-PAJ\_3064-YP\_005935940.1--36H-COG2/1-544  
Pectob.2320-W5S\_1733-YP\_006282696.1--36H-COG2/1-535  
Pe.atr.485-ECA4334-YP\_052421.1--36H-COG2/1-556  
Di.zea.1140-Dd1591\_1602-YP\_003003935.1--36H-COG2/1-554  
Pectob.2320-W5S\_4506-YP\_006285424.1--36H-COG2/1-540  
Di.zea.1140-Dd1591\_1453-YP\_003003794.1--36H-COG2/1-532  
Pectob.2320-W5S\_0106-YP\_006281117.1--36H-COG2/1-556  
Di.zea.1140-Dd1591\_0769-YP\_003003127.1--36H-COG2/1-505  
Ra.aqu.1678-Q7S\_18035-YP\_005403387.1--36H-COG2/1-535  
Rahnel.1320-Rahaq\_3579-YP\_004214298.1--36H-COG2/1-535  
Pe.car.1139-PC1\_4072-YP\_003019623.1--36H-COG2/1-540  
Pe.car.1139-PC1\_3464-YP\_003019016.1--36H-COG2/1-551  
Pe.car.1139-PC1\_0111-YP\_003015709.1--36H-COG2/1-556  
Pe.atr.485-ECA0182-YP\_048309.1--36H-COG2/1-542  
Pectob.2320-W5S\_3753-YP\_006284688.1--36H-COG2/1-551  
Pa.ana.1905-PAJ\_2666-YP\_005935542.1--36H-COG2/1-514  
Ci.rod.62-ROD\_1616-YP\_003365194.1--36H-COG6/1-557  
En.asb.1498-Entas\_2095-YP\_004828614.1--36H-COG6/1-563  
En.638.865-Ent638\_1961-YP\_001176688.1--36H-COG6/1-563  
Cr.sak.579-ESA\_01710-YP\_001437800.1--36H-COG6/1-565  
Cr.tur.6-CTU\_22440-YP\_003210607.1--36H-COG6/1-565  
Ci.kos.578-CRO\_01456-YP\_001453025.1--36H-COG6/1-562  
Rahnel.1320-Rahaq\_1930-YP\_004212674.1--36H-COG6/1-566  
Pantoe.297-Pat9b\_2403-YP\_004116261.1--36H-COG6/1-564  
Er.bill.197-Ebc\_26700-YP\_003742048.1--36H-COG6/1-567  
Pectob.2320-W5S\_1760-YP\_006282723.1--36H-COG6/1-570  
Pa.ana.1905-PAJ\_1621-YP\_005934497.1--36H-COG6/1-568  
En.clo.1544-EcWSU1\_02120-YP\_004951978.1--36H-COG6/1-576  
Ra.aqu.1678-Q7S\_09815-YP\_005401764.1--36H-COG6/1-566  
Ye.pse.585-YPTB2412-YP\_070925.1--36H-COG6/1-579  
Ye.ent.378-YE2588-YP\_001006789.1--36H-COG6/1-579  
Di.dad.235-Dda3937\_02787-YP\_003883649.1--36H-COG6/1-572  
Pa.vag.184-Pvag\_1800-YP\_003931435.1--36H-COG6/1-568  
En.bac.2261-D782\_2307-YP\_007340470.1--36H-COG6/1-558  
Pe.atr.485-ECA1683-YP\_049784.1--36H-COG6/1-573  
Pe.car.1139-PC1\_2617-YP\_003018183.1--36H-COG6/1-573  
Di.zea.1140-Dd1591\_1535-YP\_003003868.1--36H-COG6/1-574  
Di.zea.1140-Dd1591\_3580-YP\_003005868.1--36H-COG6/1-572  
Es.col.1836-Y75\_p1397-YP\_489867.1--36H-COG6/1-546  
Pe.atr.485-ECA3902-YP\_051990.1--36H-COG6/1-575  
Sa.bon.1474-SBG\_1454-YP\_004730321.1--36H-COG6/1-537  
Sa.ent.407-STM1626-NP\_460585.1--36H-COG6/1-541  
Pe.car.1139-PC1\_3679-YP\_003019230.1--36H-COG6/1-567  
Pectob.2320-W5S\_4020-YP\_006284955.1--36H-COG6/1-575  
Di.zea.1140-Dd1591\_0523-YP\_003002884.1--36H-COG6/1-568  
Di.dad.235-Dda3937\_02665-YP\_003881279.1--36H-COG6/1-572

QPL----QEALVIAENVAAGDL--TSEIYT--DRKDETQGLLSALNNMNSLRQIVSQVR  
QPI----QALVMADRVSQGDL--SSHIS--HRKDEAGRLLQALDHMNASLRQIVSQVR  
RPL----NITLAAQRIARGDL--SQAVPV--SGRDETMGLLTAVAEMQDLSLAQTVSTVR  
RPL----REAVTAEVNAAGDL--RTVIRV--NSTDETQGLMQLKHMNNENLRIIVTEVR  
RPL----HTAVKVAENVAAGDL--TTQIQV--MSQDETQGLMQLKHMNNENLRIIVTEVR  
RPV----KHNLLEAERIAAGDL--SSDIRA--QGNDELQGLTGAMGRMNDTLRSMIGDVR  
RPL----HTAVKVAENVAAGDL--TTQIQV--MSQDETQGLMQLKHMNNENLRIIVTEVR  
RPL----QEALTLAEKVAAGDL--TTDASA--CAQDETQGLLQALYGMNDSLRQIVSQVR  
RPL----GAAVGFQAIAEGDL--TOHVEI--KNQDETQGLLRALVEMKRRLELIVQEVO  
HPV----RHNLQLAERIAAGDL--SSDIHP--QGDDELQGLTGAMGRMNDTLRSMIGDVR  
QPL----QEALGVAENVAAGDL--TSEIYT--GRKDETQGLLSALNNMNSLRQIVSQVR  
RSLGAEPALQKVEARVASGDL--SPSDEI--HPVPD--GSVSTLKAMQRNLASIVGTVR  
RPL----HQALHATRAIAEGDL--TVQLHN--ERRDELQGLLSAMQMNNSLRQIVSQVR  
RPL----NVAVEAARRVARGDL--TGTVTA--DRKDETIILLSAISDMQNSLINTVSLVR  
RPL----HQALHATRAIAEGDL--TVQLHN--ERRDELQGLLSAMQMNNSLRQIVSQVR  
RPI----QALQVADRVAQGD--TSRITI--TSKDETGLLQSLDHMNTSLSSIVGQVR  
LPL----RRTLQTAERIAAGDL--STHATS--HSFDEVQGLSRAIETMNNQNLHGIGDRI  
QPI----QALQVADRVAQGD--TSRITV--TSKDETGLLQSLDHMNTSLSSIVGQVR  
QPI----QALVMADRVSQGDL--TSQISS--NRKDEAGLLQALDHMNASLRQIVSQVR  
LPL----RRTLQTAERIAAGDL--STHATS--HSFDEVQGLSRAIETMNNQNLHGIGDRI  
RPI----QALQVADRVAQGD--TSRITV--TSKDETGLLQSLDHMNTSLSSIVGQVR  
QPL----ARAVSATQVAAGDL--THNIQP--EGRDEAQLLHALQDMTVRLRSIVGVR  
TPL----SIALSSAKRISEGDL--SGSIVV--NRRDETGLLQSLDHMNTSLSSIVGVR  
KPV----QEALSAIEASGRGDM--RTTFRKD--YHSDDETQGLSLKDTVVMNIFMLNQVR  
RPL----NQALIAAQRVAKGDL--SEPVQV--THTDETQGLLVAIEMQALVQTVSLVR  
GPL----SIALSSAKRISEGDL--SGSIVV--NRRDETGLLQSLDHMNTSLSSIVGVR  
RQLGGEPAYTLEVTQVAQGNL--AFTIEL--RDGDTTS--VLAAMEDMRQNLNLVGVQV  
RPL----QAALTLAGVAKGDL--TTEASA--CTREDETGLLQALYGMNDSLRQIVSQVR  
RPI----EQALHVAADRVAQGD--TSHITV--ASKDETGLLQSLDRMNTSLSSIVGQVR  
RSL----SQAQAAAANGDL--TYPINA--SGRDEITVTLNLSHMQESLGSMTQVR  
RQIGGEPAYTLEVTQVAQGNL--AVTIEL--RDGDTTS--VLASIEDMRQNLNLVGVQV  
RPL----HEALQATRAIASEGDL--TVRLRS--ERRDELQGLLCAMAKMNDLHGMDKIR  
RALGEEPLVLGVQVQRIAAGDL--SEVKG--ENAPQ--NSVLAELGGMAKHLQHLINQVA  
RALGEEPLVLGVQVQRIAAGDL--SEVKG--ENAPQ--NSVLAELGGMAKHLQHLINQVA  
RPI----QALQVADRVAQGD--TSHITV--TSKDETGLLQSLDRMNTSLSSIVGQVR  
QPL----ARAVSATQVAAGDL--THNVQP--EGRDEAQLLHALQDMTVRLRSIVGVR  
RQLGGEPAYTLEVTQVAQGNL--AVAIEL--RDGDTTS--VLAAMEDMRQNLNLVGVQV  
RPI----EQALQVADRVAQGD--ISRITV--TSKDETGLLQSLDRMNTSLSSIVGQVR  
QPL----SRAVQATQVAAGDL--THNIQP--EGRDEAQLLHALQDMTVRLRSIVGVR  
RQLGGEPAYTLEVTQVAQGNL--TAPVIL--RHDSSSLLASLANMQSLSLVTQIK  
RPL----QHAALRIEQIAAGDL--TMDPEP--TGRSEIGRLSRHLQMMQSSSLGQTVGTVR  
NPL----QRAAKRIENIAKGD--TMDPDA--TGRSEIGRLSRHLQMMQSSSLGQTVGTVR  
NPL----QRAARRIELIAKGD--TMADDL--TGRSEIGRLSRHLQMMQSSSLGQTVGTVR  
VPL----QHAATRIETIASGD--TLPEEA--TGRSEIGRLSRHLQMMQSSSLGQTVGTVR  
VPL----QHAATRIETIASGD--TLPEEA--TGRSEIGRLSRHLQMMQSSSLGQTVGTVR  
NPL----QRAAQRIEQIAAGDL--TMDPDP--TGRSEIGRLSRHLQMMQSSSLGQTVGTVR  
HPL----NRMVMRIQKIAEGDL--TQPTRA--HGRNEIGVLSNNDVQMRSLASTVLTVR  
NPL----RQSVARIERIAQGD--TAPEQA--WGRSEIGSLLHNLQMLQASLVTGTVR  
TPL----RQAVERIEHISRGDL--TAPLQN--WGRSEIGTGLSGLNQQMSSSLGQTVGTVR  
KPM----NQLVMRIQRIAGDL--TQVSDR--YGKNEIGTLASNVHQMQSSSLGQTVGTVR  
NPL----RNSVAHIERIAQGD--TAPTVP--HGRNEIGLGLDNLQRMQSSSLGQTVGTVR  
NPL----QRAATRIENIAKGD--TMDPEV--AGRSEIGRLSRHLQMMQSSSLGQTVGTVR  
HPL----NRMVMRIQKIAEGDL--TQPTRA--HGRNEIGVLSNNDVQMRSLASTVLTVR  
NPI----NWLVTRIQRIAGDL--TQSPVS--FGRNEIGVLSNNDVQMRSLASTVLTVR  
KPI----NRLVARIQRIAGDL--TQHPAP--FGRNEIGVLSNNDVQMRSLASTVLTVR  
KPM----NRLVARIQRIAGDL--TQHPAP--FGRNEIGVLSNNDVQMRSLASTVLTVR  
NPL----RQSVARIERIAQGD--TAPVIL--RHDSSSLLASLANMQSLSLVTQIK  
NPL----QHAALRIEQIAAGDL--TMDPEP--TGRSEIGRLSRHLQMMQSSSLGQTVGTVR  
KPI----NQLVMRIQRIAGDL--TQMSDR--YGKNEIGTLASNVHQMQSSSLGQTVGTVR  
KPM----NQLVARIQRIAGDL--TQMSDR--YGKNEIGTLASNVHQMQSSSLGQTVGTVR  
KPM----HRLVARIQRIAGDL--TQPNEA--YGKNEIGTLASNVHQMQSSSLGQTVGTVR  
NPM----RALVERIEHISAGDL--TMPLAQ--WGRSEIGLGHYLNQMMQSSSLGQTVGTVR  
RPL----QHAALRIEQIAAGDL--TMNDPE--AGRNEIGRLSRHLQMMQSSSLGQTVGTVR  
API----NRLVERIQKIAAGDL--TLPFMA--MGRNEIGLGTNINQNMQALNTVTVR  
RPL----QQAALRIERIAAGDL--TMNDPE--AGRSEIGRLSRHLQMMQSSSLGQTVGTVR  
QPL----QQSASRIERIAAGDL--TMADEP--TGRSEIGRLSRHLQMMQSSSLGQTVGTVR  
API----NRLVERIQKIAAGDL--TQPPMA--MGRNEIGLGTNINQNMQALNTVTVR  
API----NRLVERIQKIAAGDL--TQPPMV--MGRNEIGLGTNINQNMQALNTVTVR  
VPI----HVLVARIQRIAGDL--TQPAED--LGRNEIGLGTNINQNMQALNTVTVR  
KPM----RSLVERIEHISAGDL--TMPLAQ--WGRSEIGLGHYLNQMMQSSSLGQTVGTVR

Pr.mir.1265-PMI1666-YP 002151397.1--36H-COG1/1-568  
Di.dad.235-Dda3937\_02779-YP 003883640.1--36H-COG1/1-566  
Di.zea.1140-Dd1591\_1542-YP 003003875.1--36H-COG1/1-566  
Pe.atr.485-ECA1691-YP 049792.1--36H-COG1/1-561  
Se.pro.864-Spro 2983-Spro 001479212.1--36H-COG1/1-556  
Ph.asy.1114-PAU\_02685-YP 003041519.1--36H-COG1/1-564  
Pr.stu.1965-S70\_18135-YP 006218124.1--36H-COG1/1-561  
Mo.mor.2189-MU9\_1762-YP 007505181.1--36H-COG1/1-561  
Pe.car.1139-PC1\_2609-YP 003018175.1--36H-COG1/1-561  
Xe.nem.162-XNC1\_1620-YP 003711881.1--36H-COG1/1-567  
Pectob.2320-W5S\_1768-YP 006282731.1--36H-COG1/1-561  
Pa.vag.184-Pvag\_1723-YP 003931360.1--36H-COG1/1-558  
Ye.pes.133-YP23\_2024-YP 003568196.1--36H-COG1/1-557  
Ye.pse.585-YP2B2401-YP 070915.1--36H-COG1/1-557  
Ye.ent.378-YE2575-YP 001006778.1--36H-COG1/1-557  
Pa.ana.1905-PAJ\_1540-YP 005934416.1--36H-COG1/1-563  
Ph.lum.1262-plu1853-NP 929126.1--36H-COG1/1-564  
Serrat.1901-SerAS13\_3075-YP 006025914.1--36H-COG1/1-555  
Sa.ent.404-STY2128-NP 456485.1--36H-COG1/1-553  
Ra.aqu.1678-Q7S\_08960-YP 005401597.1--36H-COG1/1-564  
Se.mar.2260-D781\_2759-YP 007345195.1--36H-COG1/1-555  
Rahnel.1320-Rahaq\_1830-YP 004212575.1--36H-COG1/1-564  
Se.ply.1407-SerAS9\_3072-YP 004506452.1--36H-COG1/1-555  
Ed.ict.1187-NT01E1\_1461-YP 002932882.2--36H-COG1/1-555  
En.aer.1436-EAE\_15535-YP 004593297.1--36H-COG1/1-556  
Xe.bov.105-XBJ1\_1923-YP 003467827.1--36H-COG1/1-567  
Serrat.1408-SerAS12\_3073-YP 004501499.1--36H-COG1/1-555  
Er.bil.197-Ebc\_25350-YP 003741913.1--36H-COG1/1-559  
Er.tas.1011-ETA\_14650-YP 001907404.1--36H-COG1/1-554  
Sa.ent.407-STM4533-NP 463392.1--36H-COG1/1-553  
Es.col.1836-W75\_p4200-YP 492486.1--36H-COG1/1-551  
En.bac.2261-D782\_3913-YP 003742002.1--36H-COG1/1-553  
Ci.kos.578-CKO\_03442-YP 001454958.1--36H-COG1/1-554  
Cr.sak.579-ESA\_03402-YP 001439456.1--36H-COG1/1-555  
Pantoe.297-Pat9b\_1606-YP 004115479.1--36H-COG1/1-558  
Cr.tur.6-CTU\_05670-YP 003208930.1--36H-COG1/1-555  
Sa.bon.1474-SBG\_3944-YP 004732724.1--36H-COG1/1-553  
En.asb.1498-Entas\_0547-YP 004827084.1--36H-COG1/1-554  
Ci.rod.62-ROD\_48461-YP 003368233.1--36H-COG1/1-554  
Ed.tar.1771-ETAF\_1249-YP 005698855.1--36H-COG1/1-529  
En.638.865-Ent638\_0513-YP 001175251.1--36H-COG1/1-586  
Ed.ict.1187-NT01E1\_1462-YP 002932883.1--36H-COG1/1-532  
Ye.ent.378-YE2573-YP 001006777.1--36H-COG1/1-545  
Ed.tar.1771-ETAF\_1250-YP 005698856.1--36H-COG1/1-530  
Mo.mor.2189-MU9\_1763-YP 007505182.1--36H-COG1/1-524  
En.aer.1436-EAE\_15540-YP 004593298.1--36H-COG1/1-536  
En.638.865-Ent638\_2456-YP 001177176.1--36H-COG1/1-533  
Se.pro.864-Spro 2982-YP 001479211.1--36H-COG1/1-541  
Es.col.1836-W75\_p1861-YP 490147.1--36H-COG1/1-533  
Serrat.1901-SerAS13\_3074-YP 006025913.1--36H-COG1/1-541  
Ye.pes.133-YP23\_2023-YP 003568195.1--36H-COG1/1-536  
Serrat.1408-SerAS12\_3072-YP 004501498.1--36H-COG1/1-541  
Se.mar.2260-D781\_2758-YP 007345194.1--36H-COG1/1-534  
Ye.pse.585-YP2B2400-YP 070914.1--36H-COG1/1-536  
Se.ply.1407-SerAS9\_3071-YP 004506451.1--36H-COG1/1-541  
Pr.stu.1965-S70\_18140-YP 006218125.1--36H-COG1/1-521  
En.bac.2261-D782\_1749-YP 007339930.1--36H-COG1/1-533  
En.asb.1498-Entas\_2590-YP 004829104.1--36H-COG1/1-533  
En.asb.1498-Entas\_3672-YP 004830170.1--36H-COG1/1-545  
Ci.kos.578-CKO\_01067-YP 001452646.1--36H-COG1/1-537  
En.clo.1544-3cW5U1\_02810-YP 004952663.1--36H-COG1/1-538  
Sa.ent.407-STM3152-NP 462067.1--36H-COG1/1-547  
Pe.atr.485-ECA1332-YP 049438.1--36H-COG1/1-555  
Pe.car.1139-PC1\_1208-YP 003016792.1--36H-COG1/1-555  
En.638.865-Ent638\_3407-YP 001178118.1--36H-COG1/1-545  
Pa.vag.184-Pvag\_1413-YP 003931052.1--36H-COG1/1-554  
Ph.asy.1114-PAU\_02684-YP 003041518.1--36H-COG1/1-544  
Pa.ana.1905-PAJ\_1316-YP 005934192.1--36H-COG1/1-556  
Ci.kos.578-CKO\_04394-YP 001455885.1--36H-COG1/1-561  
Sa.bon.1474-SBG\_2750-YP 004731563.1--36H-COG1/1-547  
Ra.aqu.1678-Q7S\_16025-YP 005402985.1--36H-COG1/1-554  
Rahnel.1320-Rahaq\_3177-YP 004213898.1--36H-COG1/1-554  
Pectob.2320-W5S\_3114-YP 006284066.1--36H-COG1/1-555  
Ye.ent.378-YE2971-YP 001007160.1--36H-COG1/1-552  
Er.bil.197-Ebc\_20190-YP 003741400.1--36H-COG1/1-556  
Ph.lum.1262-plu1854-NP 929127.1--36H-COG1/1-544  
Er.bil.197-Ebc\_25340-YP 003741912.1--36H-COG1/1-528  
Di.zea.1140-Dd1591\_2937-YP 003005238.1--36H-COG1/1-564  
Er.tas.1011-ETA\_14670-YP 001907406.1--36H-COG1/1-518  
Sa.ent.404-STY4234-NP 458344.1--36H-COG1/1-547  
Sa.ent.407-STM3577-NP 462478.1--36H-COG1/1-547  
Sa.bon.1474-SBG\_3170-YP 004731982.1--36H-COG1/1-547  
En.asb.1498-Entas\_2591-YP 004829105.1--36H-COG1/1-555  
En.638.865-Ent638\_1858-YP 001176586.1--36H-COG1/1-552  
Ci.rod.62-ROD\_19331-YP 003365490.1--36H-COG1/1-553  
Di.dad.235-Dda3937\_01559-YP 003882087.1--36H-COG1/1-566  
Er.bil.197-Ebc\_37780-YP 004743156.1--36H-COG1/1-553  
Pantoe.297-Pat9b\_2001-YP 003115872.1--36H-COG1/1-558

QSTENIYNSTSEIAAGNNDLSRTEEQVAALEETAASMEQLTATVKQNAENARQASQLAN  
QGAEEIYTGATEISAGNSDLSRTEEQVAALEETAASMEQLTATVKQNAENARQASQLAL  
QSSEIYTGATEISAGNSDLSRTEEQVAALEETAASMEQLTATVKQNAENARQASQLAL  
QGADAIYTGATEISAGNNDLSRTEEQVAALEETAASMEQLTATVKQNAENARQASQLAL  
QGADAIYTGATEISAGNNDLSRTEEQVAALEETAASMEQLTATVKQNAENARQASQLAL  
QSSESIDYDGTSEIAAGNNDLSRTEEQVAALEETAASMEQLTATVKQNAENARQASNLAD  
DGSEIYQGTSEIAAGNNDLSRTEEQVAALEETAASMEQLTATVKQNTYEAHQASEYAS  
DGSEIYQGTSEIAAGNNDLSRTEEQVAALEETAASMEQLTATVKQNTYEAHQASEYAFAG  
QGADAIYTGATEISAGNNDLSRTEEQVAALEETAASMEQLTATVKQNAENARQASQLAL  
QSTATYTGTEISAGNNDLSRTEEQVAALEETAASMEQLTATVKQNAENARQASNLAD  
QGADAIYTGATEISAGNNDLSRTEEQVAALEETAASMEQLTATVKQNAENARQASQLAL  
DGSDAIYTGATEISAGNNDLSRTEEQVAALEETAASMEQLTATVKQNAENARQASQLAL  
VGADAIYSGASEIAVGNNDLSRTEEQVAALEETAASMEQLTATVKQNAENARQASQLAL  
VGADAIYSGASEIAAGNNDLSRTEEQVAALEETAASMEQLTATVKQNAENARQASQLAL  
LGADAIYSGASEIAAGNNDLSRTEEQVAALEETAASMEQLTATVKQNAENARQASQLAL  
DGADAIYTGATEISAGNNDLSRTEEQVAALEETAASMEQLTATVKQNAENARQASQLAL  
QSSESINYGTSEIAAGNNDLSRTEEQVAALEETAASMEQLTATVKQNAENARQASNLAD  
QGADAIYSGASEIAAGNNDLSRTEEQVAALEETAASMEQLTATVKQNAENARQASQLAL  
EGSDAIYSGTSEIAAGNNDLSRTEEQVAALEETAASMEQLTATVKQNAENARQASQLAL  
HGADAIYSGASEIAAGNNDLSRTEEQVAALEETAASMEQLTATVKQNAENARQASQLAL  
QGADAIYSGASEIAAGNNDLSRTEEQVAALEETAASMEQLTATVKQNAENARQASQLAL  
HGADAIYSGASEISAGNSDLSRTEEQVAALEETAASMEQLTATVKQNAENARQASQLAL  
QGADAIYSGASEIAAGNNDLSRTEEQVAALEETAASMEQLTATVKQNAENARQASQLAL  
QGANAISYSGASEISAGNNDLSRTEEQVAALEETAASMEQLTATVKQNAENARQASQLAL  
QGADAIYSGASEIAAGNNDLSRTEEQVAALEETAASMEQLTATVKQNAENARQASQLAL  
QSTETIYTGTEISAGNNDLSRTEEQVAALEETAASMEQLTATVKQNAENARQASNLAD  
QGADAIYSGASEIAAGNNDLSRTEEQVAALEETAASMEQLTATVKQNAENARQASQLAL  
DGSDAIYTGATEISAGNNDLSRTEEQVAALEETAASMEQLTATVKQNAENARQASQLAL  
NGSDAIYSGASEISSGNNDLSRTEEQVAALEETAASMEQLTATVKQNAENARQASQLAL  
NGANAISYSGASEIAMGNNDLSRTEEQVAALEETAASMEQLTATVKQNAENARQASHLAL  
NGANAISYSGASEIAMGNNDLSRTEEQVAALEETAASMEQLTATVKQNAENARQASHLAL  
NGADAIYSGASEIAMGNNDLSRTEEQVAALEETAASMEQLTATVKQNAENARQASHLAL  
NGANAISYSGASEIAMGNNDLSRTEEQVAALEETAASMEQLTATVKQNAENARQASHLAL  
NGADAIYSGASEISAGNNDLSRTEEQVAALEETAASMEQLTATVKQNAENARQASQLAL  
DGSDAIYTGATEISAGNNDLSRTEEQVAALEETAASMEQLTATVKQNAENARQASQLAL  
NGADAIYSGASEISAGNNDLSRTEEQVAALEETAASMEQLTATVKQNAENARQASQLAL  
NGANAISYSGASEIAMGNNDLSRTEEQVAALEETAASMEQLTATVKQNAENARQASHLAL  
NGANAISYSGASEISMGNNDLSRTEEQVAALEETAASMEQLTATVKQNAENARQASHLAL  
NGANAISYSGASEIAMGNNDLSRTEEQVAALEETAASMEQLTATVKQNAENARQASHLAL  
QGANAISYSGASEISAGNNDLSRTEEQVAALEETAASMEQLTATVKQNAENARQASQLAL  
NGANAISYSGASEISVGNNDLSRTEEQVAALEETAASMEQLTATVKQNAENARQASNLAL  
QGTDAIYTGQIIEIAGNNDLSRTEEQVAALEETAASMEQLTATVKQNAENARQASQLAL  
DGTEISMLTGQIIEIAGNNDLSRTEEQVAALEETAASMEQLTATVKQNAENARQASQLAL  
QGTDAIYTGQIIEIAGNNDLSRTEEQVAALEETAASMEQLTATVKQNAENARQASQLAL  
LNTDQMYGTGIREIALGNNDLSRTEEQVAALEETAASMEQLTATVKQNAENARQASQLAL  
DGAESILILGQIIEIAGNNDLSRTEEQVAALEETAASMEQLTATVKQNAENARQASQLAL  
QGSYAMHTGISEIAAGNNDLSRTEEQVAALEETAASMEQLTATVSNADNARQASDLAK  
DGAESILILGQIIEIAGNNDLSRTEEQVAALEETAASMEQLTATVKQNAENARQASQLAL  
KGSQEMHIGIAEIVAGNNDLSRTEEQVAALEETAASMEQLTATVKQNAENARQASQLAL  
DGAESILILGQIIEIAGNNDLSRTEEQVAALEETAASMEQLTATVKQNAENARQASQLAL  
EGTEISMLTGQIIEIAGNNDLSRTEEQVAALEETAASMEQLTATVKQNAENARQASQLAL  
DGAESILILGQIIEIAGNNDLSRTEEQVAALEETAASMEQLTATVKQNAENARQASQLAL  
TNTDQMYGTGIREIALGNNDLSRTEEQVAALEETAASMEQLTATVKQNAENARQASQLAL  
QGSYAMHTGISEIAAGNNDLSRTEEQVAALEETAASMEQLTATVSNADNARQASDLAK  
QGSYAMHTGISEIAAGNNDLSRTEEQVAALEETAASMEQLTATVSNADNARQASDLAK  
SGSENIRWGTATEISSGNNDLSRTEEQVAALEETAASMEQLTATVKNAENARQASQLAL  
QGSYAMHTGISEIAAGNNDLSRTEEQVAALEETAASMEQLTATVSNADNARQASDLAK  
AGSDNIRWGTATEISSGNNDLSRTEEQVAALEETAASMEQLTATVKNAENARQASQLAL  
NSTDSIYQGASEIAAGNNDLSRTEEQVAALEETAASMEQLTATVKQNAENANHASQLAL  
NSTDSIYQGASEIAAGNNDLSRTEEQVAALEETAASMEQLTATVKQNAENANHASQLAL  
SGSDNIRWGTATEISSGNNDLSRTEEQVAALEETAASMEQLTATVKNAENANHASQLAL  
SGTENIRSGAAEISSAGNNDLSRTEEQVAALEETAASMEQLTATVKFNAENARQASLLAE  
ENTNLIMYSGLIETIQGNTDLSRTEEQVAALEETAASMEQLTATVKQNAENARQASQLAL  
SGTENIRSGAAEISSAGNNDLSRTEEQVAALEETAASMEQLTATVKFNAENARQASLLAE  
SGSDNIRWGTATEISSGNNDLSRTEEQVAALEETAASMEQLTATVKNAENANHASQLAL  
AGSDNIRWGTATEISSGNNDLSRTEEQVAALEETAASMEQLTATVKNAENANHASQLAL  
GSTDYIYTGATEISAGNSDLSRTEEQVAALEETAASMEQLTATVKQNAENARQASQLAL  
EGSDAIYAGTSEIAAGNNDLSRTEEQVAALEETAASMEQLTATVKQNAENARQASQLAL  
TSADSIYQGVSEIAGNNDLSRTEEQVAALEETAASMEQLTATVKQNAENANHASQLAL  
DSSNAIFTGASEISLGNNDLSRTEEQVAALEETAASMEQLTATVKQNAENARQASQLAL  
SGTENIRSGAAEISSAGNNDLSRTEEQVAALEETAASMEQLTATVKFNAENANHASQLAL









Pectob.2320-W5S\_2813-YP\_006283770.1--36H-COG2/1-554  
Di.zea.1140-Dd1591\_0695-YP\_003003055.1--36H-COG2/1-561  
Pa.vag.184-Pvag\_pPag30079-YP\_003729820.1--36H-COG2/1-546  
Er.bill.197-Ebc\_38940-YP\_003743272.1--36H-COG2/1-526  
Ra.aqu.1678-Q7S\_24891-YP\_005419232.1--36H-COG2/1-554  
En.asb.1498-Entas\_2287-YP\_004828805.1--36H-COG2/1-513  
Rahnel.1320-Rahaq\_4869-YP\_004215574.1--36H-COG2/1-554  
Di.dad.235-Dda3937\_00027-YP\_003883574.1--36H-COG2/1-554  
Pr.stu.1965-S70\_05790-YP\_006215722.1--36H-COG2/1-520  
En.638.865-Ent638\_2100-YP\_001176826.1--36H-COG2/1-512  
Pe.car.1139-PC1\_2526-YP\_003018093.1--36H-COG2/1-554  
Mo.mor.2189-MU9\_702-YP\_007504121.1--36H-COG2/1-525  
Pe.car.1139-PC1\_3443-YP\_003018995.1--36H-COG2/1-511  
Pa.ana.1905-PAJ\_0915-YP\_005933791.1--36H-COG2/1-559  
Pectob.2320-W5S\_3736-YP\_006284671.1--36H-COG2/1-510  
Pe.atr.485-ECA0183-YP\_048310.1--36H-COG2/1-553  
Rahnel.1320-Rahaq\_3107-YP\_004213828.1--36H-COG2/1-503  
Pe.car.1139-PC1\_4071-YP\_003019622.1--36H-COG2/1-553  
Di.dad.235-Dda3937\_03462-YP\_003884507.1--36H-COG2/1-563  
Ra.aqu.1678-Q7S\_15665-YP\_005402913.1--36H-COG2/1-503  
Pectob.2320-W5S\_4505-YP\_006285423.1--36H-COG2/1-555  
Pe.atr.485-ECA3642-YP\_051730.1--36H-COG2/1-551  
Pe.car.1139-PC1\_1417-YP\_003019699.1--36H-COG2/1-554  
En.asb.1498-Entas\_4509-YP\_004821569.1--36H-COG2/1-559  
Pa.ana.1905-PAJ\_3064-YP\_005935940.1--36H-COG2/1-544  
Pectob.2320-W5S\_1733-YP\_006282696.1--36H-COG2/1-535  
Pe.atr.485-ECA4334-YP\_052421.1--36H-COG2/1-556  
Di.zea.1140-Dd1591\_1602-YP\_003003935.1--36H-COG2/1-554  
Pectob.2320-W5S\_4506-YP\_006285424.1--36H-COG2/1-540  
Di.zea.1140-Dd1591\_1453-YP\_003003794.1--36H-COG2/1-532  
Pectob.2320-W5S\_0106-YP\_006281117.1--36H-COG2/1-556  
Di.zea.1140-Dd1591\_0769-YP\_003003127.1--36H-COG2/1-505  
Ra.aqu.1678-Q7S\_18035-YP\_005403387.1--36H-COG2/1-535  
Rahnel.1320-Rahaq\_3579-YP\_004214298.1--36H-COG2/1-535  
Pe.car.1139-PC1\_4072-YP\_003019623.1--36H-COG2/1-540  
Pe.car.1139-PC1\_3464-YP\_003019016.1--36H-COG2/1-551  
Pe.car.1139-PC1\_0111-YP\_003015709.1--36H-COG2/1-556  
Pe.atr.485-ECA0182-YP\_048309.1--36H-COG2/1-542  
Pectob.2320-W5S\_3753-YP\_006284688.1--36H-COG2/1-551  
Pa.ana.1905-PAJ\_2666-YP\_005935542.1--36H-COG2/1-514  
Ci.rod.62-ROD\_16161-YP\_003365194.1--36H-COG6/1-557  
En.asb.1498-Entas\_2095-YP\_004828614.1--36H-COG6/1-563  
En.638.865-Ent638\_1961-YP\_001176688.1--36H-COG6/1-563  
Cr.sak.579-ESA\_01710-YP\_001437800.1--36H-COG6/1-565  
Cr.tur.6-CTU\_22440-YP\_003210607.1--36H-COG6/1-565  
Ci.kos.578-CRO\_01456-YP\_001453025.1--36H-COG6/1-562  
Rahnel.1320-Rahaq\_1930-YP\_004212674.1--36H-COG6/1-566  
Pantoe.297-Pat9b\_2403-YP\_004116261.1--36H-COG6/1-564  
Er.bill.197-Ebc\_26700-YP\_003742048.1--36H-COG6/1-567  
Pectob.2320-W5S\_1760-YP\_006282723.1--36H-COG6/1-570  
Pa.ana.1905-PAJ\_1621-YP\_005934497.1--36H-COG6/1-568  
En.clo.1544-EcWSU1\_02120-YP\_004951978.1--36H-COG6/1-576  
Ra.aqu.1678-Q7S\_09815-YP\_005401764.1--36H-COG6/1-566  
Ye.pse.585-YPTB2412-YP\_070925.1--36H-COG6/1-579  
Ye.ent.378-YE2588-YP\_001006789.1--36H-COG6/1-579  
Di.dad.235-Dda3937\_02787-YP\_003883649.1--36H-COG6/1-572  
Pa.vag.184-Pvag\_1800-YP\_003931435.1--36H-COG6/1-568  
En.bac.2261-D782\_2307-YP\_007340470.1--36H-COG6/1-558  
Pe.atr.485-ECA1683-YP\_049784.1--36H-COG6/1-573  
Pe.car.1139-PC1\_2617-YP\_003018183.1--36H-COG6/1-573  
Di.zea.1140-Dd1591\_1535-YP\_003003868.1--36H-COG6/1-574  
Di.zea.1140-Dd1591\_3580-YP\_003005868.1--36H-COG6/1-572  
Es.col.1836-Y75\_p1397-YP\_489687.1--36H-COG6/1-546  
Pe.atr.485-ECA3902-YP\_051990.1--36H-COG6/1-575  
Sa.bon.1474-SBG\_1454-YP\_004730321.1--36H-COG6/1-537  
Sa.ent.407-STM1626-NP\_460585.1--36H-COG6/1-541  
Pe.car.1139-PC1\_3679-YP\_003019230.1--36H-COG6/1-567  
Pectob.2320-W5S\_4020-YP\_006284955.1--36H-COG6/1-575  
Di.zea.1140-Dd1591\_0523-YP\_003002884.1--36H-COG6/1-568  
Di.dad.235-Dda3937\_02665-YP\_003881279.1--36H-COG6/1-572

GASATVKKSGAMMETVTQEMRGIRDSSQRM AEI IGV DGI AFQ T NI LALNA AVEAARAGE  
QASSAAHRSGEVMSL SVTSKMRGIRESSMRMAE I IGV DGI AFQ T NI LALNA AVEAARAGE  
NVREVARQNGEVNTADISGTMKSI GESSGRIADIT SVIDS IAFQ T NI LALNA AVEAARAGE  
LASKVASQSGDAVKQVVSTMEMINGSSRK IVDI I SVI DGI AFQ T NI LALNA AVEAARAGE  
QASRVAVQGGVVEVVTMEGINTSSRK IVDI IAV I DGI AFQ T NI LALNA AVEAARAGE  
EASQTATHGGRVMDVVNTMNDINTSSQKI ADITAVINS IAFQ T NI LALNA AVEAARAGE  
QASRVAVQGGVVEVVTMEGINTSSRK IVDI IAV I DGI AFQ T NI LALNA AVEAARAGE  
QASDITVRQSGEMMADVTREMR EIRASQRM AEI IGV DSI AFQ T NI LALNA AVEAARAGE  
DTAVVVANNGRMNEVTNKIRAIHSSSNQMT E I INL I DSI AFQ T NI LALNA AVEAARAGE  
EASQTATQGGRVMDVVSTMSDINTSSKKI ADITAVINS IAFQ T NI LALNA AVEAARAGE  
SASETVKKSGAMMETVTQEMRGIRDSSQRM AEI IGV DGI AFQ T NI LALNA AVEAARAGE  
EASETARHGGEKVDLVIHAMQDISNSRTITDI IGV DSI AFQ T NI LALNA AVEAARAGE  
DASDTANLGGQVSKAVNTMHGIAQSSHRI AEITSMINS IAFQ T NI LALNA AVEAARAGE  
SVRDVANQKNEATTAITGTMKSI SESSGRI AEITAV I DGI AFQ T NI LALNA AVEAARAGE  
SASETVKKSGAMMETVTQEMRGIRDSSQRM AEI IGV DGI AFQ T NI LALNA AVEAARAGE  
EASETARHGGEKVDLVIHAMQDISNSRTITDI IGV DSI AFQ T NI LALNA AVEAARAGE  
DASDTANLGGQVSKAVNTMHGIAQSSHRI AEITSMINS IAFQ T NI LALNA AVEAARAGE  
SVRDVANQKNEATTAITGTMKSI SESSGRI AEITAV I DGI AFQ T NI LALNA AVEAARAGE  
SASETVKKSGAMMETVTQEMRGIRDSSQRM AEI IGV DGI AFQ T NI LALNA AVEAARAGE  
DASATANQKQVSKAVNTMHGIAQSSHRI AEITSMINS IAFQ T NI LALNA AVEAARAGE  
KASSAAKQSGDVMVSVTQKMRGIRDSSQRM AEI IGV DGI AFQ T NI LALNA AVEAARAGE  
DAANTAARGGKLVADVGVVGMKEITVSSKQI SEITTVINS IAFQ T NI LALNA AVEAARAGE  
KASGAAKQSGDVMVSVTQKMRGIRDSSQRM AEI IGV DGI AFQ T NI LALNA AVEAARAGE  
QASSAAHRSGEVMSL SVTKMRGIREASMRMAE I IGV DGI AFQ T NI LALNA AVEAARAGE  
DAANTAARGGKLVADVGVVGMKEITVSSKQI SEITTVINS IAFQ T NI LALNA AVEAARAGE  
KASGAAKQSGDVMVSVTQKMRGIRDSSQRM AEI IGV DGI AFQ T NI LALNA AVEAARAGE  
STTQQAQSGGQLVTEVVTMGAIDSSSK IVDI IGV DSI AFQ T NI LALNA AVEAARAGE  
NASTVALQGGVNDVNDVVTMKAINDSSRS IVDI INVI DSI AFQ T NI LALNA AVEAARAGE  
EASDITVRQSGEMMADVTREMR EIRNASQRM AEI IGV DSI AFQ T NI LALNA AVEAARAGE  
KATGAAKQSGEVMSL SVTQKMRG IHDSSQRM AEI IGV DGI AFQ T NI LALNA AVEAARAGE  
TASQVAEQGGSVVTQVVDTRMDINDSAQR IADI IGV DGI AFQ T NI LALNA AVEAARAGE  
SASTTAQKGGDAVNNVVRTMEDITASSRK IVDI IGV DSI AFQ T NI LALNA AVEAARAGE  
NASTTAQKGGDAVNSVVRTMEDITASSRK IVDI IGV DSI AFQ T NI LALNA AVEAARAGE  
SASQVAQRGGNVVERVVTMHEIAESSGKVTQI ITVIEG IAFQ T NI LALNA AVEAARAGE  
SASQVAQRGGNVVERVVTMHEIAESSGKVTQI ITVIEG IAFQ T NI LALNA AVEAARAGE  
KATGAAKQSGDVMVSVTQKMRGIRDSSQRM AEI IGV DGI AFQ T NI LALNA AVEAARAGE  
STTQQAQSGGQLVTEVVTMGAIDSSSK IVDI IGV DSI AFQ T NI LALNA AVEAARAGE  
EASATLARTGGESEVQLMSHTMNEIASATKVRDI TGVIES IAFQ T NI LALNA AVEAARAGE  
DAAGKASRGGMVSGVVTMGNISASSK ISEITAVINS IAFQ T NI LALNA AVEAARAGE  
DASGKASRGGMVSGVVTMGNISSTSSK ISEITAVINS IAFQ T NI LALNA AVEAARAGE  
DASGKASRGGMVSGVVTMGNISSTSSK ISEITAVINS IAFQ T NI LALNA AVEAARAGE  
DASGKATTTGGQIVSGVVTMGNISSTSSK ISEITAVINS IAFQ T NI LALNA AVEAARAGE  
DASGKATTTGGQIVSGVVTMGNISSTSSK ISEITAVINS IAFQ T NI LALNA AVEAARAGE  
DASGKASRGGMVSGVVTMGNISSTSSK ISEITAVINS IAFQ T NI LALNA AVEAARAGE  
DASNKAQKGGNIVAEVVTMDKISRSTKIAEITNVINS IAFQ T NI LALNA AVEAARAGE  
DASGKARNGGEIVAGVVTMNNISGSSK IAEITNVINS IAFQ T NI LALNA AVEAARAGE  
DASGKASQGGEIVSGVITMNNISSTSSK IAEITNVINS IAFQ T NI LALNA AVEAARAGE  
NAGSKAKQGGEIVANVVNTMNNISGSSK ISEITVINS IAFQ T NI LALNA AVEAARAGE  
DASGKASRGGMVSGVVTMNDISGSSK IAEITNVINS IAFQ T NI LALNA AVEAARAGE  
DASGKASRGGMVSGVVTMNNISSTSSK ISEITAVINS IAFQ T NI LALNA AVEAARAGE  
DASNKAQKGGNIVAEVVTMDKISRSTKIAEITNVINS IAFQ T NI LALNA AVEAARAGE  
NAGSKAAQGGDIVSDVVTMDKISLSSMKIAEITNVINS IAFQ T NI LALNA AVEAARAGE  
NASEKAEKRGQIVQGVVDTMQDITSSKRI SEITVINS IAFQ T NI LALNA AVEAARAGE  
DASGKASRGGMVSGVVTMGNISSTSSK ISEITVINS IAFQ T NI LALNA AVEAARAGE  
DASGKASRGGMVSGVVTMGNISSTSSK ISEITVINS IAFQ T NI LALNA AVEAARAGE  
DASGKASRGGMVSGVVTMGNISSTSSK ISEITVINS IAFQ T NI LALNA AVEAARAGE  
NASEKAEKRGQIVQGVVDTMQDITSSKRI SEITVINS IAFQ T NI LALNA AVEAARAGE  
NASEKAGKGGQIVQGVVDTMHDISTSSKRI SEITVINS IAFQ T NI LALNA AVEAARAGE  
NASEKAEKGGQIVQGVVDTMHDISTSSKRI SEITVINS IAFQ T NI LALNA AVEAARAGE  
NAGSKARQGGELVDSVVTMGNIHQSSK ISEITNI INGI AFQ T NI LALNA AVEAARAGE

















En.clo.1544-ECWSU1\_01962-YP\_004951821.1--36H-COG1/1-553  
 En.asb.1498-Entas\_1879-YP\_004828403.1--36H-COG1/1-554  
 En.bac.2261-D782\_1748-YP\_007339929.1--36H-COG1/1-547  
 Es.col.1836-Y75\_p1862-YP\_490148.1--36H-COG1/1-553  
 Cr.tur.6-CTU\_33010-YP\_003211664.1--36H-COG1/1-555  
 Cr.tur.6-CTU\_25780-YP\_003210941.1--36H-COG1/1-536  
 En.clo.1544-ECWSU1\_00403-YP\_004950264.1--36H-COG1/1-549  
 En.638.865-Ent638\_2457-YP\_001177177.1--36H-COG1/1-555  
 Sa.bon.1474-SBG\_1755-YP\_004730609.1--36H-COG1/1-553  
 Pr.mir.1265-PMI1665-YP\_002151396.1--36H-COG1/1-548  
 Cr.sak.579-ESA\_01348-YP\_001437444.1--36H-COG1/1-556  
 Cr.sak.579-ESA\_00560-YP\_001436686.1--36H-COG1/1-555  
 Sa.ent.407-STM1919-NP\_460876.1--36H-COG1/1-553  
 Ci.kos.578-CKO\_01066-YP\_001452645.1--36H-COG1/1-552  
 En.asb.1498-Entas\_0424-YP\_004826963.1--36H-COG1/1-549  
 Pantoe.297-Pat9b\_1273-YP\_004115150.1--36H-COG1/1-553  
 Ed.tar.1771-ETAF\_2264-YP\_005699859.1--36H-COG1/1-555  
 Pa.ana.1905-PAJ\_3534-YP\_005936409.1--36H-COG1/1-553  
 Pa.vag.184-Pvag\_1203-YP\_003930842.1--36H-COG1/1-552  
 Pantoe.297-Pat9b\_1605-YP\_004115478.1--36H-COG1/1-556  
 Cr.sak.579-ESA\_00210-YP\_001436348.1--36H-COG1/1-557  
 Er.tas.1011-ETA\_pET460340-YP\_001905943.1--36H-COG1/1-543  
 Cr.tur.6-CTU\_36610-YP\_003212024.1--36H-COG1/1-557  
 Pe.car.1139-PC1\_1159-YP\_003016743.1--36H-COG1/1-556  
 Er.tas.1011-ETA\_14640-YP\_001907403.1--36H-COG1/1-554  
 Pa.vag.184-Pvag\_1725-YP\_003931362.1--36H-COG1/1-556  
 Ed.ict.1187-NT01EI\_3742-YP\_002935104.1--36H-COG1/1-525  
 En.638.865-Ent638\_0380-YP\_001175119.1--36H-COG1/1-549  
 Er.bil.197-Ebc\_25360-YP\_003741914.1--36H-COG1/1-556  
 Er.tas.1011-ETA\_16910-YP\_001907630.1--36H-COG1/1-543  
 Es.fer.1173-EFER\_3055-YP\_002384154.1--36H-COG1/1-603  
 Xe.nem.162-XNC1\_1619-YP\_003711880.1--36H-COG1/1-520  
 En.clo.1544-ECWSU1\_02811-YP\_004952664.1--36H-COG1/1-559  
 Di.dad.235-Dda3937\_03500-YP\_003882750.1--36H-COG1/1-553  
 Xe.bov.105-XBJ1\_1924-YP\_003467828.1--36H-COG1/1-523  
 Rahnel.1320-Rahaq\_1831-YP\_004212576.1--36H-COG1/1-556  
 Ra.aqu.1678-Q7S\_08965-YP\_005401598.1--36H-COG1/1-556  
 Cr.sak.579-ESA\_01126-YP\_001437230.1--36H-COG1/1-514  
 Pe.atr.485-ECA2712-YP\_050803.1--36H-COG1/1-560  
 En.clo.1544-ECWSU1\_00560-YP\_004950421.1--36H-COG1/1-597  
 Di.dad.235-Dda3937\_03498-YP\_003882752.1--36H-COG1/1-561  
 Cr.tur.6-CTU\_27880-YP\_003211151.1--36H-COG1/1-514  
 Pe.car.1139-PC1\_1669-YP\_003017246.1--36H-COG1/1-560  
 Ra.aqu.1678-Q7S\_14450-YP\_005402672.1--36H-COG1/1-551  
 Ci.kos.578-CKO\_03622-YP\_001455137.1--36H-COG1/1-517  
 Di.zea.1140-Dd1591\_2408-YP\_003004728.1--36H-COG1/1-557  
 Di.zea.1140-Dd1591\_2406-YP\_003004726.1--36H-COG1/1-559  
 Ed.ict.1187-NT01EI\_2801-YP\_002934203.1--36H-COG1/1-554  
 Pe.car.1139-PC1\_1384-YP\_003016966.1--36H-COG1/1-559  
 Rahnel.1320-Rahaq\_2866-YP\_004213595.1--36H-COG1/1-551  
 Pe.atr.485-ECA1281-YP\_049387.1--36H-COG1/1-556  
 Pectob.2320-W5S\_1886-YP\_006282848.1--36H-COG1/1-549  
 Pectob.2320-W5S\_1696-YP\_006282659.1--36H-COG1/1-559  
 Di.zea.1140-Dd1591\_2407-YP\_003004727.1--36H-COG1/1-555  
 Pe.atr.485-ECA1509-YP\_049611.1--36H-COG1/1-559  
 Pa.vag.184-Pvag\_1724-YP\_003931361.1--36H-COG1/1-520  
 Pa.ana.1905-PAJ\_1541-YP\_005934417.1--36H-COG1/1-520  
 Mo.mor.2189-MU9\_1596-YP\_007505015.1--36H-COG1/1-519  
 Pr.mir.1265-PMI2808-YP\_002152509.1--36H-COG1/1-563  
 Di.zea.1140-Dd1591\_0395-YP\_003002764.1--36H-COG1/1-556  
 En.clo.1544-ECWSU1\_03786-YP\_004953635.1--36H-COG1/1-515  
 Pectob.2320-W5S\_3170-YP\_006284116.1--36H-COG1/1-556  
 Di.dad.235-Dda3937\_02184-YP\_003884754.1--36H-COG1/1-556  
 Ci.rod.62-ROD\_32641-YP\_003366748.1--36H-COG1/1-517  
 Di.dad.235-Dda3937\_03499-YP\_003882751.1--36H-COG1/1-561  
 Di.dad.235-Dda3937\_00105-YP\_003883346.1--36H-COG1/1-561  
 Pantoe.297-Pat9b\_1604-YP\_004115477.1--36H-COG1/1-555  
 Er.tas.1011-ETA\_14660-YP\_001907405.1--36H-COG1/1-560  
 Pr.mir.1265-PMI2809-YP\_002152510.1--36H-COG1/1-575  
 Ed.tar.1771-ETAF\_3053-YP\_005700648.1--36H-COG1/1-516  
 Se.pro.864-Spro\_1415-YP\_001477647.1--36H-COG1/1-546  
 Di.zea.1140-Dd1591\_1804-YP\_003004134.1--36H-COG1/1-562  
 Di.dad.235-Dda3937\_03501-YP\_003882749.1--36H-COG1/1-575  
 Pantoe.297-Pat9b\_0851-YP\_004114731.1--36H-COG2/1-524  
 Pa.vag.184-Pvag\_0291-YP\_003929953.1--36H-COG2/1-525  
 En.clo.1544-ECWSU1\_03886-YP\_004953735.1--36H-COG2/1-519  
 Cr.tur.6-CTU\_04790-YP\_003208842.1--36H-COG2/1-515  
 Ci.kos.578-CKO\_04484-YP\_001455975.1--36H-COG2/1-521  
 Cr.sak.579-ESA\_03488-YP\_001439539.1--36H-COG2/1-515  
 Ci.rod.62-ROD\_48071-YP\_003368199.1--36H-COG2/1-521  
 Sa.bon.1474-SBG\_2851-YP\_004731664.1--36H-COG2/1-521  
 Sa.ent.407-STM3216-NP\_462130.1--36H-COG2/1-521  
 En.asb.1498-Entas\_3753-YP\_004830248.1--36H-COG2/1-519  
 Mo.mor.2189-MU9\_3389-YP\_007506806.1--36H-COG2/1-521  
 Sa.ent.404-STY3394-NP\_457606.1--36H-COG2/1-522  
 En.638.865-Ent638\_3526-YP\_001178235.1--36H-COG2/1-519  
 Pe.atr.485-ECA1774-YP\_049874.1--36H-COG2/1-554  
 En.638.865-Ent638\_2119-YP\_001176845.1--36H-COG2/1-549  
 VAAFRNLNGK-EKATAPRPA--TVKT--PQL-----L  
 VAAFRNLNAK-DQAAAPRPK--NVKT--PQL-----L  
 VSAFRLASS-ARAVASLKT--ASAP--VVK-----L  
 VSAFRLAAS-PLTNKQPTP----SR--PAS-----EQPP----AQ  
 VAAFKVSRG-VVSTSTRTG--VAPS--ARIE-----PV  
 VAAFRFLASA-RANAPRSEP--AAAP--VSA-----SPAL----YA  
 VAVFKITRN-PVVNAAPVK-----S-----YTP  
 VSAFRLTST-PVNTDTSRA--VFAG--TTS-----AAVV----KN  
 VSAFRLASR-PLATNKSEA----RL--SAD-----IQPG----NT  
 VSAFRLPDT-DEGSSHSL--EGNG--LKKA-----APRT----AQ  
 VAAFRLAAS-RASAPRSVQ--TAAP--VSA-----SLTP----VA  
 VAAFKVSRG-VVSAARTG--AAPL--VRVE-----PV  
 VSAFRLASR-PLAVNKPEM----RL--SVN-----AQSG----NT  
 VSAFRLASR-PLTVKTDL----NT--TAA-----APRT----AQ  
 VAVFKIARG-QAVKAAFPVK-----T-----YVP  
 VARFNTGAR-QATAVLRVP--SAPV-----VAPRA----KA  
 VSQFRINDQ-EERKAPVSAK--PVAA--PATP-----APSA----KA  
 VAVFNTGRT-PAAGQNVLR--KPSL--KKPL-----A-----A  
 VSVFKTGTL-HAFAFSAAPV--AKAI--AVPK-----A-----A  
 VSVFNIIPRV-QAADGVTRH--QPIA--PKV-----LD----TP  
 VAVFKLNRA-QARAASVAP--QASS--FS-----APAP----VA  
 VSRFRLPES-SESALRSTPAVVKPA--AA-----A-----A  
 VAVFNTGRT-PAAGQNVLR--KPSL--KKPL-----A-----A  
 VAVFKINGQ-VAQEHRAES--APSL--AA-----LPTS----LL  
 VAVFRITQQ-TVVAVRELK--RPVL-----KPAA----MP  
 VSVFKIKRE-ARPTLTKH---LPIA--STV-----TKAL----TP  
 VALFTLPES-QASRPA-----T-----FAA  
 VAVFKINGR-RAVKAAPVK-----T-----FAA  
 VAVFRVRKE-SGFTPAAKA--STVK--RAA-----SP----VA  
 VSRFRLPES-SESALRSTPAVAKPA--AA-----A-----A  
 VAVFRIHHE-QQRARESAV--VKTV-----TAP----AA  
 VAKFELPKG-ENSGYSHQK--PSAS--NMED-EYI-----TR  
 VSAFRLASL-AGNTVTPQA--TYLA--PAA-----AAAA----TR  
 VAAFDLGDPT-PTALRSRPA-----SA--PALK-----RPVL----KA  
 VALFELSES-LDNEYDHQT--SSAS--KMTD-EYI-----A-----A  
 VSVFRLATT-DGAGQRRSG--LAQG--LTSR-Q-V-----AQPAL----LP  
 VSVFRLATT-DGAGQRRSG--LAQG--LTSR-Q-V-----AQPAL----LP  
 VQKFRLSA-----T-----FAA  
 VSVFQLSAA-EAPRRPQQR--LAEK--APAA-Q-----KFML----LA  
 VAVFRIQQE-QMKAREQAS--AKTA-----AAP----MM  
 VEVFHLGSE-YQTAASRPR--PAGN--MALK-----RPAL----SG  
 VQKFRLSA-----T-----FAA  
 VSVFQLSAS-EAHRRPQQR--LAER--APAV-E-----KFML----LA  
 VSVFKIEGR-APLSSASLL--PKNK--TQKN-----EPEI----TK  
 VAVFKV-----T-----FAA  
 VAAFDLGDGR-HGLIAGSARR---VE--PALK-----RPAA----AS  
 VEVFHLGTE-HRSTAVNTG--RSGG--MALK-----RPAL----KG  
 VSQFRISQ-EADKASVSAK--PVAT--APA-----APSA----KA  
 VDVFDLSDS-CDPATSFSR--PAVA--APVH-----RAVG----RS  
 VSVFKIEGR-APLSSASLL--PKNK--TQKN-----EPEI----TK  
 VEVFKINQA-VAQEHRAES--ASSL--AA-----LPKS----LL  
 ISVFQLSGS-EAHRRPQQR--LAEK--TPTA-Q-----KFML----LA  
 VDVFDLSDS-SDLQPAFSR--SALS--SPAH-----RAIG----QS  
 VAAFDLGGG-SGALHSRPR--PTA--PALK-----RPSQ----KA  
 VDVFDLSDS-SDQQTAFSR--PAIA--APVH-----RAVA----QS  
 VSVFKISRA-----T-----FAA  
 VSVFKISRV-----T-----FAA  
 VQKFRLSA-----T-----FAA  
 VNTKFEVQV-AVTSRPSPT--FSAK--PA-----EPEI----TK  
 VAVFRLPGV-ADASATRRVHKPAGK--VAAL-----T  
 VQKFRLSA-----T-----FAA  
 VEVFKINGQ-AAQEPRVAS--APSP--AA-----LPKS----LL  
 VSVFKLPGV-ADATAARRELKPAK--VAAL-----A  
 VAIKFKV-----T-----FAA  
 VTAFDLGDGR-QSVLIAPRA---AV--PALK-----RPAL----KA  
 VSLFRLDTA-ASPSASRAT--PAAT--TPA-----APPL----LA  
 VSVFNIIPRT-QATGGVTRH--PQIA--PKV-----LA----SV  
 VAVFQMRKE-NRIAAVNNL--AAPK--TSS-----LSPA----TA  
 VEQFKTAES-LFSKKSTLT-KPVEK--SANI-G-LSPIKENQDQDSRIK-EPKN-----HN  
 VALFTLPDGD-STGSDARAT--TA-----A-----A  
 VSLFLKATH-ASAGVHVQP--QAI--APKV-----VA  
 VSLFRLHGA-ASLTKTKHR--PAVG--MTAE-----TPRL----SV  
 VAAFDLGDPT-PTALRSRPA-----SA--AALK-----RPVS----AS  
 MSVFKTGHG-MELSVV-----T-----FAA  
 MSVFNKGL-ALQPVLR-----T-----FAA  
 VRVFRVSDR-VLA-----T-----FAA  
 IKVFRLSA-----T-----FAA  
 KVFRIRTE-DVPPA-----T-----FAA  
 IKVFRLSA-----T-----FAA  
 VKMFRVSEK-DALAA-----T-----FAA  
 VNVFRVREE-DVQFA-----T-----FAA  
 VNVFRVREE-DTQFA-----T-----FAA  
 KVFRVNEY-APA-----T-----FAA  
 VGVFQLAGT-PSSVS-----T-----FAA  
 VNVFRVREE-DTQFA-----T-----FAA  
 KVFRVRED-ALV-----T-----FAA  
 ISVFNVLGAS-YKSAALNRK---TE--TPAL-A-----APKN----NR  
 VRVFRVLRDS-EVNSAPVRT-----HV-----SPAV----IP



Pectob.2320-W5S 2813-YP 0062883770.1--36H-COG2/1-554 VSVFNLGAS-YKSAALTRK---VE--TPAL-A-----APKN----NR  
 Di.zea.1140-Dd1591\_0695-YP 003003055.1--36H-COG2/1-561 VSAFRLTPQ-GNSSATSPARQSAVL--SPAL-P-V-----RPAV----TE  
 Pa.vag.184-Pvag\_pPag30079-YP 003729820.1--36H-COG2/1-546 VSVFTLAAV-SPPPVTRQA--IVSV-----PAT-----  
 Er.bil.197-Ebc 38940-YP 003743272.1--36H-COG2/1-526 ISVFKVNDV-HYHGQALA-----SPAL----LS  
 Ra.aqu.1678-Q7S 24891-YP 005419232.1--36H-COG2/1-554 ISIFKVSAG-SATAAVRKA--GQTK-----SPAL----LS  
 En.asb.1498-Entas 2287-YP 004828805.1--36H-COG2/1-513 VAAFLRLEQS-AQAA-----SPAL----LS  
 Rahnel.1320-Rahaq 4869-YP 004215574.1--36H-COG2/1-554 ISIFKVSAG-SATAAVRKA--GQTK-----SPAL----LS  
 Di.dad.235-Dda3937\_00027-YP 003883574.1--36H-COG2/1-554 VSVFRLNNN-WSDKGTTRR-QPGGK--ALAL-A-G-----LPGA-----  
 Pr.stu.1965-S70 05790-YP 006215722.1--36H-COG2/1-520 VNYFQVSAT-HENRSV-----KPGF----KTA  
 En.638.865-Ent638 2100-YP 001176826.1--36H-COG2/1-512 VAAFLRLEQN-ARAA-----SAA-----  
 Pe.car.1139-PC1 2526-YP 003018093.1--36H-COG2/1-554 VSVFNLGAS-YKSAALSRK---VE--TPAL-S-----APKN----NR  
 Mo.mor.2189-MU9 702-YP 007504121.1--36H-COG2/1-525 MTQFRLGSS-AA-----PAA-----  
 Pe.car.1139-PC1 3443-YP 003018995.1--36H-COG2/1-511 VSVFRLLPQ-SQSQSIHRLA-----SPAL----LS  
 Pa.ana.1905-PAJ 0915-YP 005933791.1--36H-COG2/1-559 VSVFSLSGP-SALSVAVHP--ATVV-----KPGF----KTA  
 Pectob.2320-W5S 3736-YP 006284671.1--36H-COG2/1-510 VSVFRLHP-SQQDLRRLT-----SAA-----  
 Pe.atr.485-ECA0183-YP 048310.1--36H-COG2/1-553 VSTFKLLSY-GNGKTASYASAP-TR--TPTL-S-L-----APAA-----  
 Rahnel.1320-Rahaq 3107-YP 004213828.1--36H-COG2/1-503 VSVFRLGNE-----PAA-----  
 Pe.car.1139-PC1 4071-YP 003019622.1--36H-COG2/1-553 VSVFKLLSY-GSKTASYASAP-VR--TPTL-S-L-----APAA-----  
 Di.dad.235-Dda3937\_03462-YP 003884507.1--36H-COG2/1-563 VSAFRLTPQ-GGNGAPSPVRQPTAL--SHAL-PSA-----RPNV----TE  
 Ra.aqu.1678-Q7S 15665-YP 005402913.1--36H-COG2/1-503 VSVFRLGNE-----PAA-----  
 Pectob.2320-W5S 4505-YP 006285423.1--36H-COG2/1-555 VSAFKLLSY-GNGKAASYASSP-TR--TPTL-S-L-----ASAT----TP  
 Pe.atr.485-ECA3642-YP 051730.1--36H-COG2/1-551 VQFRLNGG-HQIARTPAA--AASL--TL-----RPAL----AA  
 Pe.car.1139-PC1 1417-YP 003016999.1--36H-COG2/1-554 VSVFRIAGH-KPSMLQPAT--QALS--LVAM-----LPVS----T-  
 En.asb.1498-Entas 4509-YP 004821569.1--36H-COG2/1-559 VVNQFSLREE-IETDATSIM--RAEV--KQE-----LKNPSR-----  
 Pa.ana.1905-PAJ 3064-YP 005935940.1--36H-COG2/1-544 VSVFRFNNM-TQQVHVSPT-----LKNPSR-----  
 Pectob.2320-W5S 1733-YP 006282696.1--36H-COG2/1-535 VSVFKIANY-GLSTPKPAT--QTLN--L-AR-----LPAA----A-  
 Pe.atr.485-ECA4334-YP 052421.1--36H-COG2/1-556 MGVFKLNGI-QTKAPRLTS--QVKQ--PA-----APRL----AL  
 Di.zea.1140-Dd1591\_1602-YP 003003935.1--36H-COG2/1-554 VSVFRLNNN-WSDNSAARF-QPGEK--GLAL-T-G-----LPGA-----  
 Pectob.2320-W5S 4506-YP 006285424.1--36H-COG2/1-540 VSAFKIQSY-SRGNAASYASTP-VS--TPML-A-L-----ANKA-----  
 Di.zea.1140-Dd1591\_1453-YP 003003794.1--36H-COG2/1-532 VGVFRLSDR-ASGARPDTR--VAEQ--ELLL-----APRL----AL  
 Pectob.2320-W5S 0106-YP 006281117.1--36H-COG2/1-556 MGVFKIANG-QAPAPRLTS--PMKP--QT-----APRL----AL  
 Di.zea.1140-Dd1591\_0769-YP 003003127.1--36H-COG2/1-505 VSVFRLSNT-----LTPRL----SA  
 Ra.aqu.1678-Q7S 18035-YP 005403387.1--36H-COG2/1-535 ISAFDISRA-GNLNVTATA-----PAA-----  
 Rahnel.1320-Rahaq 3579-YP 004214298.1--36H-COG2/1-535 ISAFDISRA-GNLNVTATA-----PAA-----  
 Pe.car.1139-PC1 4072-YP 003019623.1--36H-COG2/1-540 VSAFKIQSY-SGNSNGGSYV--P-MR--TPTL-S-L-----ALAS----KE  
 Pe.car.1139-PC1 3464-YP 003019016.1--36H-COG2/1-551 VQFRLNGS-HQIARTPAA--APSL--AL-----QPAL----AA  
 Pe.car.1139-PC1 0111-YP 003015709.1--36H-COG2/1-556 MGVFKISGV-QAQAPRLSA--QVKQ--PT-----APRL----AL  
 Pe.atr.485-ECA0182-YP 048309.1--36H-COG2/1-542 VSAFKIPSY-SHGNAAGSYVSP-MS--TPTL-S-L-----ALAR----KE  
 Pectob.2320-W5S 3753-YP 006284688.1--36H-COG2/1-551 VQFRLDMS-HQIARTPVA--TPTL--AL-----QPAL----AA  
 Pa.ana.1905-PAJ 2666-YP 005935542.1--36H-COG2/1-514 VEAFFV-----PAA-----  
 Ci.rod.62-ROD 16161-YP 003365194.1--36H-COG6/1-557 VGAFRLQGG-SAAKRTARQ-----PEV-----  
 En.asb.1498-Entas 2095-YP 004828614.1--36H-COG6/1-563 VGAFRLNGA-TASRSVASS-----PAV----KS  
 En.638.865-Ent638 1961-YP 001176688.1--36H-COG6/1-563 VGAFRLNGV-APSRSAKPS-----ALA----QS  
 Cr.sak.579-EA 01710-YP 001437800.1--36H-COG6/1-565 VGAFRLGSA-SAAKNEPQ--PPA-----AQPL----AP  
 Cr.tur.6-CTU 22440-YP 003210607.1--36H-COG6/1-565 VGTFRLSAA-SAAKNEPQ--PPA-----AQPL----AP  
 Ci.kos.578-CRO 01456-YP 001453025.1--36H-COG6/1-562 VGAFRLQGG-SAIKRAPS-----DVV----AS  
 Rahnel.1320-Rahaq 1930-YP 004212674.1--36H-COG6/1-566 VAVFRLDGS-TRSAQPQSP--ASSR-----ALPG----PA  
 Pantoe.297-Pat9b 2403-YP 004116261.1--36H-COG6/1-564 VAAFLRLNDN-PGLR-----VTPP--AM-----QPAL----QT  
 Er.bil.197-Ebc 26700-YP 003742048.1--36H-COG6/1-567 VAVFQLAGH-SSIKFKSP--VSP-----TGQN----GS  
 Pectob.2320-W5S 1760-YP 006282723.1--36H-COG6/1-570 VATFKLSSH-LSSAPS--P--ARPN--ALAA-----KSRG----SL  
 Pa.ana.1905-PAJ 1621-YP 005934497.1--36H-COG6/1-568 VAAFLRLQDT-PAKPVHQS--DSAP-----KAPA----PV  
 En.clo.1544-EcWSU1\_02120-YP 004951978.1--36H-COG6/1-576 VGAFRLGSA-KPGRSVSSA-----SAV----KN  
 Ra.aqu.1678-Q7S 09815-YP 005401764.1--36H-COG6/1-566 VAVFRLDGS-TRSAQPQSP--ASSR-----ALPG----PA  
 Ye.pse.585-YPTB2412-YP 070925.1--36H-COG6/1-579 VAVFQLAGH-SSIKFKSP--VSP-----TGQN----GS  
 Ye.ent.378-YE2588-YP 001006789.1--36H-COG6/1-579 VAVFHLNGR-NPAPALKTP--APTS-----IQQN----KT  
 Di.dad.235-Dda3937\_02787-YP 003883649.1--36H-COG6/1-572 VSAFKLTHG-QDKAYAQAP--LAQK--PLLA-----TSTA----GL  
 Pa.vag.184-Pvag 1800-YP 003931435.1--36H-COG6/1-568 VAAFLRLQDS-PATKVAAR--VTSP--AR-----TPAL-----  
 En.bac.2261-D782 2307-YP 007340470.1--36H-COG6/1-558 VGTFRIPSH-SGVKKENVP-----PAA-----A  
 Pe.atr.485-ECA1683-YP 049784.1--36H-COG6/1-573 VATFKLSSH-LSSGHS-AP--ARPN--ALAA-----KGRS----SL  
 Pe.car.1139-PC1 2617-YP 003018183.1--36H-COG6/1-573 VATFKLSSH-LSSGHS-AP--ARPN--ALAA-----KDRS----SL  
 Di.zea.1140-Dd1591\_1535-YP 003003868.1--36H-COG6/1-574 VSAFKLANHLQDTAPTAS--TMSK--PLLA-T-----SSTA----RL  
 Di.zea.1140-Dd1591\_3580-YP 003005868.1--36H-COG6/1-572 VSAFRIDGM-ERQPAMSPA--SRSA--AAHT-----ALPK----TL  
 Es.col.1836-Y75 p1397-YP 489687.1--36H-COG6/1-546 VDVFRLHKK-SVSAEPRGA-----GEPV-----  
 Pe.atr.485-ECA3902-YP 051990.1--36H-COG6/1-575 VAVFKLSGI-VQQVRSLLP--KSAP--QPRL-----APAM----AI  
 Sa.bon.1474-SBG 1454-YP 004730321.1--36H-COG6/1-537 VGAFRLQGT-DPSFL-----PAA-----  
 Sa.ent.407-STM1626-NP 460585.1--36H-COG6/1-541 VDAFRLHDT-GATMRSSFL-----PAA-----  
 Pe.car.1139-PC1 3679-YP 003019230.1--36H-COG6/1-567 VAVFKLAGV-AQKLLKASLP--KAAP--QPRL-----APAM----AI  
 Pectob.2320-W5S 4020-YP 006284955.1--36H-COG6/1-575 VAVFKLAGV-AQQRRTSLP--KAAP--QPRL-----APAM----AL  
 Di.zea.1140-Dd1591\_0523-YP 003002884.1--36H-COG6/1-568 VAVFKLRHR-RENESVRAS--LPSR--PVVQ-A-----IPAV----AA  
 Di.dad.235-Dda3937\_02665-YP 003881279.1--36H-COG6/1-572 VSAFRIDGA-ERRPAINIA--ARPA--SAQA-----ALPK----AL



En.clo.1544-EcWSU1\_01962-YP\_004951821.1--36H-COG1/1-553 RPA-----TAN-TATDS--NWETF-----  
 En.asb.1498-Entas\_1879-YP\_004828403.1--36H-COG1/1-554 RPA-----TATASVADG--NWETF-----  
 En.bac.2261-D782\_1748-YP\_007339929.1--36H-COG1/1-547 -----PAV-ARSEE--NWETF-----  
 Es.col.1836-Y75\_p1862-YP\_490148.1--36H-COG1/1-553 -PR-----LRI-AEQDP--NWETF-----  
 Cr.tur.6-CTU\_33010-YP\_003211664.1--36H-COG1/1-555 KPA-----LAA-PAGGD--NWETF-----  
 Cr.tur.6-CTU\_25780-YP\_003210941.1--36H-COG1/1-536 -AS-----KPA-VAGQD--NWETF-----  
 En.clo.1544-EcWSU1\_00403-YP\_004950264.1--36H-COG1/1-549 AAK-----PVA-ATSEA--NWETF-----  
 En.638.865-Ent638\_2457-YP\_001177177.1--36H-COG1/1-555 -TR-----ATA-HGKEE--NWETF-----  
 Sa.bon.1474-SBG\_1755-YP\_004730609.1--36H-COG1/1-553 -PR-----SPA-TVDDA--NWETF-----  
 Pr.mir.1265-PMI1665-YP\_002151396.1--36H-COG1/1-548 -----DKKSFFKKTH  
 Cr.sak.579-ESA\_01348-YP\_001437444.1--36H-COG1/1-556 -AS-----QPA-VASQD--NWETF-----  
 Cr.sak.579-ESA\_00560-YP\_001436686.1--36H-COG1/1-555 KPA-----LAA-PAGGD--NWETF-----  
 Sa.ent.407-STM1919-NP\_460876.1--36H-COG1/1-553 -PQ-----SLA-ARDDA--NWETF-----  
 Ci.kos.578-CKO\_01066-YP\_001452645.1--36H-COG1/1-552 -PR-----QLA-TEQDT--HWETF-----  
 En.asb.1498-Entas\_0424-YP\_004826963.1--36H-COG1/1-549 KTQ-----PVA-TATEA--NWETF-----  
 Pantoe.297-Pat9b\_1273-YP\_004115150.1--36H-COG1/1-553 -LK-----APA-AAGND--NWETF-----  
 Ed.tar.1771-ETAF\_2264-YP\_005699859.1--36H-COG1/1-555 -----A-AASR-SDDDA--NWDQF-----  
 Pa.ana.1905-PAJ\_3534-YP\_005936409.1--36H-COG1/1-553 -ES-----TSA-GLSAE--NWQSF-----  
 Pa.vag.184-Pvag\_1203-YP\_003930842.1--36H-COG1/1-552 -RQ-----PVA-VTDNE--NWQTF-----  
 Pantoe.297-Pat9b\_1605-YP\_004115478.1--36H-COG1/1-556 RKA-----LTA-FVSDS--NWETF-----  
 Cr.sak.579-ESA\_00210-YP\_001436348.1--36H-COG1/1-557 SLK-----AAP-AGGSD--NWETF-----  
 Er.tas.1011-ETA\_pET460340-YP\_001905943.1--36H-COG1/1-543 -----KGA-AGSGD--DWLAF-----  
 Cr.tur.6-CTU\_36610-YP\_003212024.1--36H-COG1/1-557 SLK-----AAP-AGGSE--NWETF-----  
 Pe.car.1139-PC1\_1159-YP\_003016743.1--36H-COG1/1-556 PKP-----ASA-GSANA--NWETF-----  
 Er.tas.1011-ETA\_14640-YP\_001907403.1--36H-COG1/1-554 -ER-----ASS-SVSDS--NWETF-----  
 Pa.vag.184-Pvag\_1725-YP\_003931362.1--36H-COG1/1-556 RKA-----LTA-PVNDT--NWETF-----  
 Ed.ict.1187-NT01EI\_3742-YP\_002935104.1--36H-COG1/1-525 -----  
 En.638.865-Ent638\_0380-YP\_001175119.1--36H-COG1/1-549 KVK-----PTA-TVSDG--NWETF-----  
 Er.bil.197-Ebc\_25360-YP\_003741914.1--36H-COG1/1-556 RKA-----SAP-VASDS--NWETF-----  
 Er.tas.1011-ETA\_16910-YP\_001907630.1--36H-COG1/1-543 -----KGA-AGSGD--DWVAF-----  
 Es.fer.1173-EFER\_3055-YP\_002384154.1--36H-COG1/1-603 PRK-----AAV-ADNSD--NWETF-----  
 Xe.nem.162-XNC1\_1619-YP\_003711880.1--36H-COG1/1-520 -----VS-----  
 En.clo.1544-EcWSU1\_02811-YP\_004952664.1--36H-COG1/1-559 -KP-----AAT-TG-HE--NWETF-----  
 Di.dad.235-Dda3937\_03500-YP\_003882750.1--36H-COG1/1-553 SLP-----A-SSSHS--DWETF-----  
 Xe.bov.105-XBJ1\_1924-YP\_003467828.1--36H-COG1/1-523 -----ASQ-VR-----  
 Rahnel.1320-Rahaq\_1831-YP\_004212576.1--36H-COG1/1-556 -----ATAG-AVSAD--NWETF-----  
 Ra.aqu.1678-Q7S\_08965-YP\_005401598.1--36H-COG1/1-556 -----ATAG-AVSAD--NWETF-----  
 Cr.sak.579-ESA\_01126-YP\_001437230.1--36H-COG1/1-514 -----  
 Pe.atr.485-ECA2712-YP\_050803.1--36H-COG1/1-560 AAG-----GKK-GNAND--NWETF-----  
 En.clo.1544-EcWSU1\_00560-YP\_004950421.1--36H-COG1/1-597 ARK-----AAT-TDAGE--NWETF-----  
 Di.dad.235-Dda3937\_03498-YP\_003882752.1--36H-COG1/1-561 MAR-----A-LPPA-RTASDEGSWEKF-----  
 Cr.tur.6-CTU\_27880-YP\_003211151.1--36H-COG1/1-514 -----  
 Pe.car.1139-PC1\_1669-YP\_003017246.1--36H-COG1/1-560 AAG-----GKK-GNAND--NWETF-----  
 Ra.aqu.1678-Q7S\_14450-YP\_005402672.1--36H-COG1/1-551 -----SRVL-TTEDG--GWTKF-----  
 Ci.kos.578-CKO\_03622-YP\_001455137.1--36H-COG1/1-517 -----  
 Di.zea.1140-Dd1591\_2408-YP\_003004728.1--36H-COG1/1-557 SPG-----V-RSVS-AATQA--DWETF-----  
 Di.zea.1140-Dd1591\_2406-YP\_003004726.1--36H-COG1/1-559 AAP-----A-LPGK-VSTQD--NWEKF-----  
 Ed.ict.1187-NT01EI\_2801-YP\_002934203.1--36H-COG1/1-554 -----A-AASR-NDDDD--NWDQF-----  
 Pe.car.1139-PC1\_1384-YP\_003016966.1--36H-COG1/1-559 STP-----L-LSAH-GRNGE--GWEKF-----  
 Rahnel.1320-Rahaq\_2866-YP\_004213595.1--36H-COG1/1-551 -----SRVL-TTEDG--GWTKF-----  
 Pe.atr.485-ECA1281-YP\_049387.1--36H-COG1/1-556 PKP-----TSA-GSSNA--NWETF-----  
 Pectob.2320-W5S\_1886-YP\_006282848.1--36H-COG1/1-549 AAS-----GKK-GNAND--NWETF-----  
 Pectob.2320-W5S\_1696-YP\_006282659.1--36H-COG1/1-559 TLP-----L-LSVH-GRHGE--GWEKF-----  
 Di.zea.1140-Dd1591\_2407-YP\_003004727.1--36H-COG1/1-555 ALP-----N-RSSHG--GWEETF-----  
 Pe.atr.485-ECA1509-YP\_049611.1--36H-COG1/1-559 TTP-----L-LSVH-GRHGE--GWEKF-----  
 Pa.vag.184-Pvag\_1724-YP\_003931361.1--36H-COG1/1-520 -----  
 Pa.ana.1905-PAJ\_1541-YP\_005934417.1--36H-COG1/1-520 -----  
 Mo.mor.2189-MU9\_1596-YP\_007505015.1--36H-COG1/1-519 -----  
 Pr.mir.1265-PMI2808-YP\_002152509.1--36H-COG1/1-563 TATSTI--KSHH-HEADD--NWESF-----  
 Di.zea.1140-Dd1591\_0395-YP\_003002764.1--36H-COG1/1-556 NLS---T-ASAP-QKSGD--DWTSF-----  
 En.clo.1544-EcWSU1\_03786-YP\_004953635.1--36H-COG1/1-515 -----  
 Pectob.2320-W5S\_3170-YP\_006284116.1--36H-COG1/1-556 PKP-----TSA-GSSNA--NWETF-----  
 Di.dad.235-Dda3937\_02184-YP\_003884754.1--36H-COG1/1-556 NLS---Q-TSRQ-EKAGD--DWTSF-----  
 Ci.rod.62-ROD\_32641-YP\_003366748.1--36H-COG1/1-517 -----  
 Di.dad.235-Dda3937\_03499-YP\_003882751.1--36H-COG1/1-561 SLP-----A-SSSHG--DWETF-----  
 Di.dad.235-Dda3937\_00105-YP\_003883346.1--36H-COG1/1-561 SRS---VA-TASA-YNTAS--HWETF-----  
 Pantoe.297-Pat9b\_1604-YP\_004115477.1--36H-COG1/1-555 RKA-----VTA-PVGDS--NWETF-----  
 Er.tas.1011-ETA\_14660-YP\_001907405.1--36H-COG1/1-560 HKA-----LPKA-TGSDE--NWETF-----  
 Pr.mir.1265-PMI2809-YP\_002152510.1--36H-COG1/1-575 -QS-----TFK-EDEDD--DWTSF-----  
 Ed.tar.1771-ETAF\_3053-YP\_005700648.1--36H-COG1/1-516 -----  
 Se.pro.864-Spro\_1415-YP\_001477647.1--36H-COG1/1-546 -----DDNGE--NWSRF-----  
 Di.zea.1140-Dd1591\_1804-YP\_003004134.1--36H-COG1/1-562 GHK---VA-TAGA-YQETG--NWETF-----  
 Di.dad.235-Dda3937\_03501-YP\_003882749.1--36H-COG1/1-575 SLG---A-RPVT-ASSQG--DWETF-----  
 Pantoe.297-Pat9b\_0851-YP\_004114731.1--36H-COG2/1-524 -----  
 Pa.vag.184-Pvag\_0291-YP\_003929953.1--36H-COG2/1-525 -----  
 En.clo.1544-EcWSU1\_03886-YP\_004953735.1--36H-COG2/1-519 -----  
 Cr.tur.6-CTU\_04790-YP\_003208842.1--36H-COG2/1-515 -----  
 Ci.kos.578-CKO\_04484-YP\_001455975.1--36H-COG2/1-521 -----  
 Cr.sak.579-ESA\_03488-YP\_001439539.1--36H-COG2/1-515 -----  
 Ci.rod.62-ROD\_48071-YP\_003368199.1--36H-COG2/1-521 -----  
 Sa.bon.1474-SBG\_2851-YP\_004731664.1--36H-COG2/1-521 -----  
 Sa.ent.407-STM3216-NP\_462130.1--36H-COG2/1-521 -----  
 En.asb.1498-Entas\_3753-YP\_004830248.1--36H-COG2/1-519 -----  
 Mo.mor.2189-MU9\_3389-YP\_007506806.1--36H-COG2/1-521 -----  
 Sa.ent.404-STY3394-NP\_457606.1--36H-COG2/1-522 -----  
 En.638.865-Ent638\_3526-YP\_001178235.1--36H-COG2/1-519 -----  
 Pe.atr.485-ECA1774-YP\_049874.1--36H-COG2/1-554 -----  
 En.638.865-Ent638\_2119-YP\_001176845.1--36H-COG2/1-549 AEK-----TSA-KGELA--DWTTF-----  
 GKPF-----AAP-RGSEK--DWQAF-----

Pectob.2320-W5S\_2813-YP\_006283770.1--36H-COG2/1-554  
 Di.zea.1140-Dd1591\_0695-YP\_003003055.1--36H-COG2/1-561  
 Pa.vag.184-Pvag\_pPag30079-YP\_003729820.1--36H-COG2/1-546  
 Er.bil.197-Ebc\_38940-YP\_003743272.1--36H-COG2/1-526  
 Ra.aqu.1678-Q7S\_24891-YP\_005419232.1--36H-COG2/1-554  
 En.asb.1498-Entas\_2287-YP\_004828805.1--36H-COG2/1-513  
 Rahnel.1320-Rahaq\_4869-YP\_004215574.1--36H-COG2/1-554  
 Di.dad.235-Dda3937\_00027-YP\_003883574.1--36H-COG2/1-554  
 Pr.stu.1965-S70\_05790-YP\_006215722.1--36H-COG2/1-520  
 En.638.865-Ent638\_2100-YP\_001176826.1--36H-COG2/1-512  
 Pe.car.1139-PC1\_2526-YP\_003018093.1--36H-COG2/1-554  
 Mo.mor.2189-MU9\_702-YP\_007504121.1--36H-COG2/1-525  
 Pe.car.1139-PC1\_3443-YP\_003018995.1--36H-COG2/1-511  
 Pa.ana.1905-PAJ\_0915-YP\_005933791.1--36H-COG2/1-559  
 Pectob.2320-W5S\_3736-YP\_006284671.1--36H-COG2/1-510  
 Pe.atr.485-ECA0183-YP\_048310.1--36H-COG2/1-553  
 Rahnel.1320-Rahaq\_3107-YP\_004213828.1--36H-COG2/1-503  
 Pe.car.1139-PC1\_4071-YP\_003019622.1--36H-COG2/1-553  
 Di.dad.235-Dda3937\_03462-YP\_003884507.1--36H-COG2/1-563  
 Ra.aqu.1678-Q7S\_15665-YP\_005402913.1--36H-COG2/1-503  
 Pectob.2320-W5S\_4505-YP\_006285423.1--36H-COG2/1-555  
 Pe.atr.485-ECA3642-YP\_051730.1--36H-COG2/1-551  
 Pe.car.1139-PC1\_1417-YP\_003016999.1--36H-COG2/1-554  
 En.asb.1498-Entas\_4509-YP\_004821569.1--36H-COG2/1-559  
 Pa.ana.1905-PAJ\_3064-YP\_005935940.1--36H-COG2/1-544  
 Pectob.2320-W5S\_1733-YP\_006282696.1--36H-COG2/1-535  
 Pe.atr.485-ECA4334-YP\_052421.1--36H-COG2/1-556  
 Di.zea.1140-Dd1591\_1602-YP\_003003935.1--36H-COG2/1-554  
 Pectob.2320-W5S\_4506-YP\_006285424.1--36H-COG2/1-540  
 Di.zea.1140-Dd1591\_1453-YP\_003003794.1--36H-COG2/1-532  
 Pectob.2320-W5S\_0106-YP\_006281117.1--36H-COG2/1-556  
 Di.zea.1140-Dd1591\_0769-YP\_003003127.1--36H-COG2/1-505  
 Ra.aqu.1678-Q7S\_18035-YP\_005403387.1--36H-COG2/1-535  
 Rahnel.1320-Rahaq\_3579-YP\_004214298.1--36H-COG2/1-535  
 Pe.car.1139-PC1\_4072-YP\_003019623.1--36H-COG2/1-540  
 Pe.car.1139-PC1\_3464-YP\_003019016.1--36H-COG2/1-551  
 Pe.car.1139-PC1\_0111-YP\_003015709.1--36H-COG2/1-556  
 Pe.atr.485-ECA0182-YP\_048309.1--36H-COG2/1-542  
 Pectob.2320-W5S\_3753-YP\_006284688.1--36H-COG2/1-551  
 Pa.ana.1905-PAJ\_2666-YP\_005935542.1--36H-COG2/1-514  
 Ci.rod.62-ROD\_16161-YP\_003365194.1--36H-COG6/1-557  
 En.asb.1498-Entas\_2095-YP\_004828614.1--36H-COG6/1-563  
 En.638.865-Ent638\_1961-YP\_001176688.1--36H-COG6/1-563  
 Cr.sak.579-ESA\_01710-YP\_001437800.1--36H-COG6/1-565  
 Cr.tur.6-CTU\_22440-YP\_003210607.1--36H-COG6/1-565  
 Ci.kos.578-CRO\_01456-YP\_001453025.1--36H-COG6/1-562  
 Rahnel.1320-Rahaq\_1930-YP\_004212674.1--36H-COG6/1-566  
 Pantoe.297-Pat9b\_2403-YP\_004116261.1--36H-COG6/1-564  
 Er.bil.197-Ebc\_26700-YP\_003742048.1--36H-COG6/1-567  
 Pectob.2320-W5S\_1760-YP\_006282723.1--36H-COG6/1-570  
 Pa.ana.1905-PAJ\_1621-YP\_005934497.1--36H-COG6/1-568  
 En.clo.1544-EcWSU1\_02120-YP\_004951978.1--36H-COG6/1-576  
 Ra.aqu.1678-Q7S\_09815-YP\_005401764.1--36H-COG6/1-566  
 Ye.pse.585-YPTB2412-YP\_070925.1--36H-COG6/1-579  
 Ye.ent.378-YE2588-YP\_001006789.1--36H-COG6/1-579  
 Di.dad.235-Dda3937\_02787-YP\_003883649.1--36H-COG6/1-572  
 Pa.vag.184-Pvag\_1800-YP\_003931435.1--36H-COG6/1-568  
 En.bac.2261-D782\_2307-YP\_007340470.1--36H-COG6/1-558  
 Pe.atr.485-ECA1683-YP\_049784.1--36H-COG6/1-573  
 Pe.car.1139-PC1\_2617-YP\_003018183.1--36H-COG6/1-573  
 Di.zea.1140-Dd1591\_1535-YP\_003003868.1--36H-COG6/1-574  
 Di.zea.1140-Dd1591\_3580-YP\_003005868.1--36H-COG6/1-572  
 Es.col.1836-Y75\_p1397-YP\_489687.1--36H-COG6/1-546  
 Pe.atr.485-ECA3902-YP\_051990.1--36H-COG6/1-575  
 Sa.bon.1474-SBG\_1454-YP\_004730321.1--36H-COG6/1-537  
 Sa.ent.407-STM1626-NP\_460585.1--36H-COG6/1-541  
 Pe.car.1139-PC1\_3679-YP\_003019230.1--36H-COG6/1-567  
 Pectob.2320-W5S\_4020-YP\_006284955.1--36H-COG6/1-575  
 Di.zea.1140-Dd1591\_0523-YP\_003002884.1--36H-COG6/1-568  
 Di.dad.235-Dda3937\_02665-YP\_003881279.1--36H-COG6/1-572  
 AEK-----TPA-KGDLA--DWTTF-----  
 RR-----AAA-IGSNS--DWTSE-----  
 -VK-----KETP-ADADG--NWTTF-----  
 -----  
 NRQ-----PVP-AADQG--NWETF-----  
 -----  
 NRQ-----PVP-AADQG--NWETF-----  
 -----K DAN--ASDTP--EWA AF-----  
 -----  
 -----  
 AEK-----TAA-KGELA--DWTTF-----  
 -----  
 -----  
 AVK-----TRA-EDEDG--SWTHF-----  
 -----  
 -----  
 -----AKN-QSNND--NWTTF-----  
 -----A-----L-----  
 -----AKD-QGNNS--DWTSE-----  
 KRA-----ATT-AGTND--DWTSE-----  
 -----A-----L-----  
 -----AKD-QGNNG--DWTTF-----  
 PGK-----SGI-SAGEG--DWTSE-----  
 -----RAA-AQRFS--DWTNF-----  
 -----KKV-IGQDT--NWEKF-----  
 -VK-----PAQ-PLTHE--GWTHF-----  
 -----SAS-ASGAS--DWTSE-----  
 -----A-SKSG-HTSSD--NWETF-----  
 -----K DAR-VTDTF--EWA AF-----  
 -----  
 -----GYQ-----  
 -----A-SQSG-NASSN--NWETF-----  
 -----  
 -----TR-----  
 -----TR-----  
 PGK-----NVA-TAGEG--DWTSE-----  
 -----A-SQSG-STSSD--NWETF-----  
 -----  
 PSK-----GNA-ATGEG--DWTSE-----  
 -----  
 -----KPV-AVSGD--SWETF-----  
 APL-----RPAAVSGD--NWETF-----  
 TPL-----RPAVADGGD--NWETF-----  
 VVP-----RAA-LAQSE--HWETF-----  
 IVP-----RAA-LAQSD--HWETF-----  
 SSP-----QPV-TTSGD--NWETF-----  
 SRS-----SKG-VNDEP--NWETF-----  
 LTP-----RVA-TVSND--NWETF-----  
 ATG-----RPA-LANSD--NWETF-----  
 ALP-----RQT-NTENG--NWETF-----  
 LRP-----AAA-TSGNE--NWETF-----  
 APL-----RPAPAVSGD--NWETF-----  
 SRS-----SKG-VNDEP--NWETF-----  
 GIN-----KKP-TDGLS--NWETF-----  
 GGN-----KRP-TDDSL--NWETF-----  
 GSS-----SSA-KPGSD--NWETF-----  
 -TP-----RPALATGSD--NWETF-----  
 TAP-----TLA-VAGGD--SWESF-----  
 ALP-----RQA-NTENG--NWETF-----  
 ALP-----RKT-NTENG--NWETF-----  
 KAP-----SGA-KPGSD--NWETF-----  
 SGA-----KKA-KTSNE--DWTSE-----  
 -----S FATV-----  
 AG-----SSK-GNSNQ--NWETF-----  
 -----  
 -----  
 AGS-----SSK-GSDNQ--NWETF-----  
 ASS-----SGK-GSDNQ--NWETF-----  
 IGV-----GKG-GRSDQ--NWETF-----  
 PGA-----KKA-KSSND--GWETF-----
