# Supplementary material for: Evolutionary Genomics Suggests That CheV Is an Additional Adaptor for Accommodating Specific Chemoreceptors within the Chemotaxis Signaling Complex
Source: PubMed Central journal article supplement (PMC4742279; doi:10.1371/journal.pcbi.1004723), 2016-02-04

**S10 Fig. Information content in the putative adaptor binding region of chemoreceptor sequences from COG1 (blue) and COG2 (red).** Positions are numbered as in *E. coli* Tar protein. Ser406 (marked with the star) is the only position in this region, which is more conserved in COG2 than in COG1.

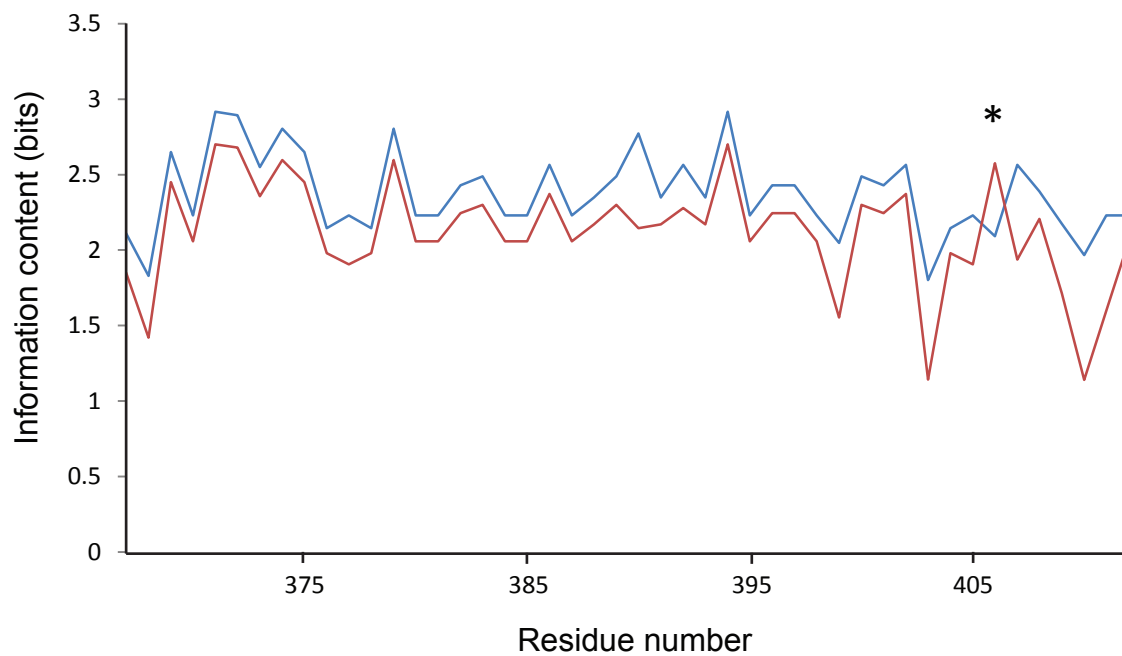

Supplement: pcbi.1004723.s012.pdf [file pcbi.1004723.s012.pdf]
