# Supplementary material for: Evolutionary Genomics Suggests That CheV Is an Additional Adaptor for Accommodating Specific Chemoreceptors within the Chemotaxis Signaling Complex
Source: PLoS Comput Biol. 2016 Feb 4;12(2):e1004723. doi: 10.1371/journal.pcbi.1004723 (PMC4742279; doi:10.1371/journal.pcbi.1004723)
Supplement: S11 Fig — Each sequence tag contains the first two letters of the genus, the first three letters of the species and the organism id in the MiST database, followed by the locus and accession number. The tag also includes the chemotaxis class for CheV (e.g. F7) (PDF) [file pcbi.1004723.s013.pdf]

**S11 Fig. Multiple sequence alignment of CheW proteins and CheV-W domains from the non-redundant *Enterobacteriales* genome set.** Each sequence tag contains the first two letters of the genus, the first three letters of the species and the organism id in the MIST database, followed by the locus and accession number. The tag also includes the chemotaxis class for CheV (e.g. F7).

Er.tas.1011-ETA 14630-YP 001907402.1  
Ed.tat.1771-ETAF 1248-YP 005698854.1  
Ed.ict.1187-NT01EI 1459-YP 002932880.1  
Di.zea.1140-Dd1591 1541-YP 003003874.1  
Pe.car.1139-PC1 2610-YP 003081876.1  
Pectob.2320-W5S 1767-YP 006282730.1  
Pa.vag.184-Pvag 1726-YP 003931363.1  
Di.dad.235-Dda3937 02780-YP 003883641.1  
Pantoe.297-Pat9b 1603-YP 004115476.1  
Se.pro.864-Spro 2984-YP 001479213.1  
Ye.pse.585-YPBT2404-YP 070918.1  
Ye.pes.1333-YPZ3 2032-YP 003568204.1  
En.aer.1436-EAE 15530-YP 004593296.1  
Pa.ana.1905-PAJ 1542-YP 005934418.1  
Er.bil.197-EbC 25370-YP 003741915.1  
Ra.aqu.1678-Q7S 08675-YP 005401542.1  
Rahnel.1320-Rahaq 1775-YP 004212520.1  
Sa.bon.1474-SBG 1756-YP 004730610.1  
Ye.ent.378-YE2576-YP 001006779.1  
Sa.ent.407-STM1920-NP 460877.1  
Ci.rod.62-ROD 19401-YP 003365497.1  
Se.mar.2260-D781 2760-YP 007345196.1  
En.bac.2261-D782 1746-YP 007339927.1  
En.638.865-Ent638 2465-YP 001177185.1  
Pr.mir.1265-PM1667-YP 002151398.1  
Ci.kos.578-CKO 01062-YP 001452641.1  
Se.ply.1407-SerAS9 3074-YP 004056454.1  
Serrat.1408-SerAS12 3075-YP 004501501.1  
Serrat.1901-SerAS13 3077-YP 006025916.1  
Pe.atr.485-ECA1690-YP 049791.1  
Es.fer.1173-EFER 1134-YP 002382296.1  
En.asb.1498-Entas 2598-YP 004829112.1  
Cr.sak.579-ESA 01342-YP 001437438.1  
En.clo.1544-EcWSU1 02819-YP 004952672.1  
Cr.tur.6-CTU 25840-YP 003210947.1  
Xu.nem.162-XNC1 1622-YP 003711883.1  
Xe.bov.105-XBJ1 1922-YP 003467826.1  
Es.col.1836-Y7S pl8663-YP 490149.1  
Ph.lum.1262-plu1852-NP 929125.1  
Ph.asy.1114-PAU 02686-YP 003041520.1  
Mo.mor.1298-MU9 1761-YP 00705180.1  
Sa.ent.404-STY2129-NP 456486.1  
Pr.stu.1965-S70 18130-YP 006218123.1  
Di.zea.1140-Dd1591 2613-YP 003004925.1-F7  
Di.dad.235-Dda3937 02985-YP 003882467.1-F7  
Ye.ent.378-YE2673-YP 001006864.1-F7  
Pe.car.1139-PC1 1449-YP 003017031.1-F7  
En.clo.1544-EcWSU1 03147-YP 004952996.1-F7  
Pectob.2320-W5S 1751-YP 006282714.1-F7  
Er.tas.1011-ETA 19840-YP 001907913.1-F7  
En.asb.1498-Entas 2991-YP 004829501.1-F7  
Cr.sak.579-ESA 02190-YP 001438275.1-F7  
Cr.tur.6-CTU 17860-YP 003210149.1-F7  
En.638.865-Ent638 2819-YP 001177535.1-F7  
Er.bil.197-EbC 11920-YP 003740575.1-F7  
Sa.bon.1474-SBG 2102-YP 004730935.1-F7  
Es.fer.1173-EFER 0899-YP 002382071.1-F7  
Sa.ent.407-STM2314-NP 461256.1-F7  
Pe.atr.485-ECA1568-YP 049670.1-F7  
Ci.kos.578-CKO 00521-YP 001452113.1-F7  
Sa.ent.404-STY2545-NP 456857.1-F7  
Ci.rod.62-ROD 26761-YP 003366207.1-F7  
Ra.aqu.1678-Q7S 09145-YP 005401634.1-F7  
Rahnel.1320-Rahaq 1865-YP 004212610.1-F7  
Pantoe.297-Pat9b 0852-YP 004114732.1-F7  
Pa.ana.1905-PAJ 0248-YP 005933214.1-F7  
Pa.vag.184-Pvag 0292-YP 003929954.1-F7

[illegible]

[illegible]
